# Supplementary material for: Mechanistic insights into dehydrocoupling of amine boranes using dinuclear zirconocene complexes
Source: Royal Society of Chemistry journal article supplement (doi:10.1039/d1cy00531f), 2021-01-01
Supplement: d1cy00531f2.pdf [file d1cy00531f2.pdf]

Supporting Information

## Mechanistic insights into amine borane dehydrocoupling using dinuclear zirconocene complexes

Kevin Lindenau<sup>a</sup>, Nora Janssen<sup>a</sup>, Mirko Rippke<sup>a</sup>, Hanan Al Hamwi<sup>a</sup>, Carmen Selle<sup>a</sup>, Hans-Joachim Drexler<sup>a</sup>, Anke Spannenberg<sup>a</sup>, Matthias Sawall<sup>b</sup>, Klaus Neymeyr<sup>a,b</sup>, Detlef Heller<sup>a</sup>, Fabian Reiß<sup>a\*</sup>, and Torsten Beweries<sup>a\*</sup>

<sup>a</sup> Leibniz-Institut für Katalyse e.V., Albert-Einstein-Str. 29a, 18059 Rostock, Germany,  
[fabian.reiss@catalysis.de](mailto:fabian.reiss@catalysis.de), [torsten.beweries@catalysis.de](mailto:torsten.beweries@catalysis.de)

<sup>b</sup> Universität Rostock, Institut für Mathematik, Universitätsplatz 1, 18055 Rostock, Germany

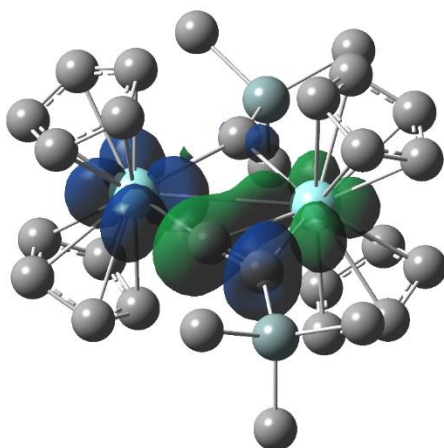

### Content

|                                              |    |
|----------------------------------------------|----|
| 1. Catalytic tests.....                      | 2  |
| 2. Crystallographic details.....             | 5  |
| 3. Details of NMR spectroscopy .....         | 7  |
| 4. Details of UV/Vis spectroscopy.....       | 41 |
| 5. Details of vibrational spectroscopy ..... | 46 |
| 6. Computational details.....                | 52 |
| 7. References.....                           | 69 |

## 1. Catalytic tests

### 1.1. Dehydrocoupling of $\text{H}_3\text{B}\cdot\text{NMe}_2\text{H}$ with **1**/MeLi, variation of catalyst concentration

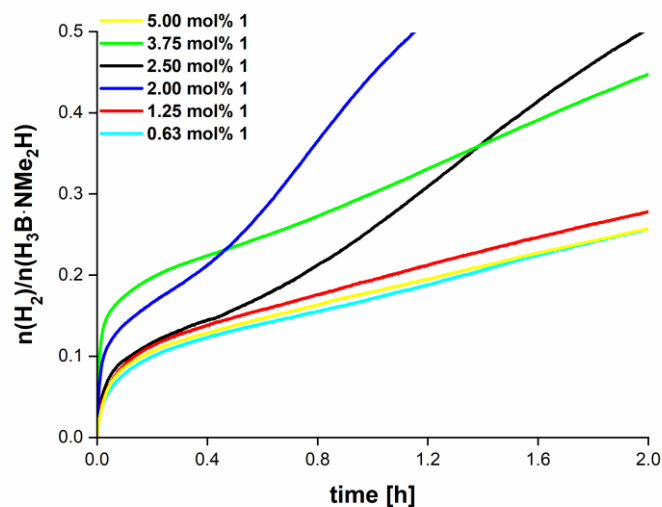

**Figure S1.** Enlargement of the volumetric curves (Figure 1) of dehydrocoupling of  $\text{H}_3\text{B}\cdot\text{NMe}_2\text{H}$  with complex **1**/MeLi. Conditions: room temperature, toluene,  $[\text{H}_3\text{B}\cdot\text{NMe}_2\text{H}] = 0.33 \text{ M}$ , 2.5 mol% **1**, 5.2 mol% MeLi.

### 1.2. Dehydrocoupling of $\text{H}_3\text{B}\cdot\text{NMe}_2\text{H}$ with **1**/MeLi, colour changes

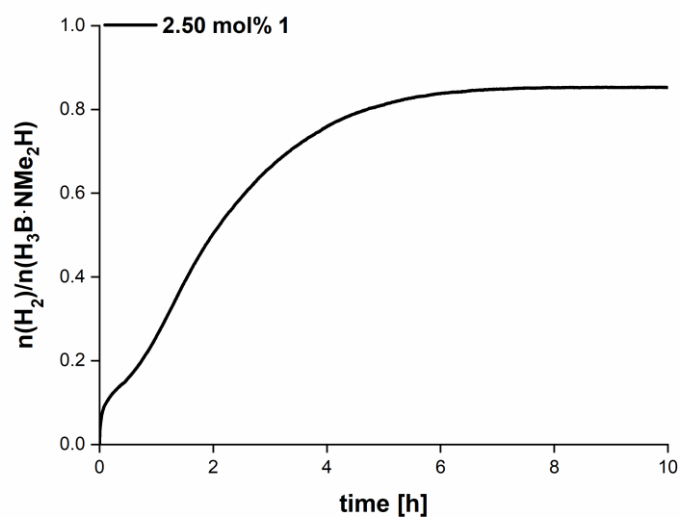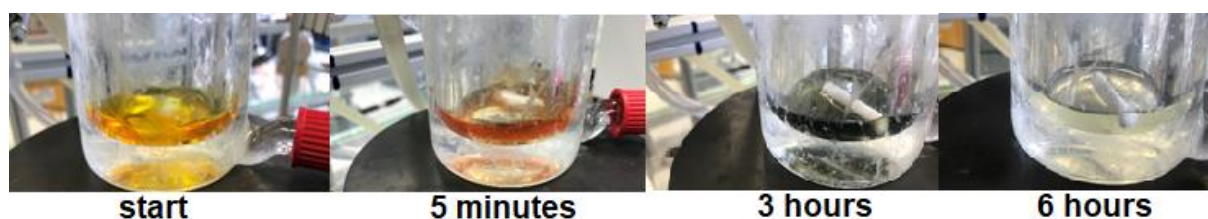

**Figure S2.** Observed colour changes in the dehydrocoupling of  $\text{H}_3\text{B}\cdot\text{NMe}_2\text{H}$  with complex **1**/MeLi. Conditions: room temperature, toluene,  $[\text{H}_3\text{B}\cdot\text{NMe}_2\text{H}] = 0.33 \text{ M}$ , 2.5 mol% **1**, 5.2 mol% MeLi.

### 1.3. Dehydrocoupling of $\text{H}_3\text{B}\cdot\text{NMe}_2\text{H}$ with $1/\text{MeLi}$ , variation of substrate concentration

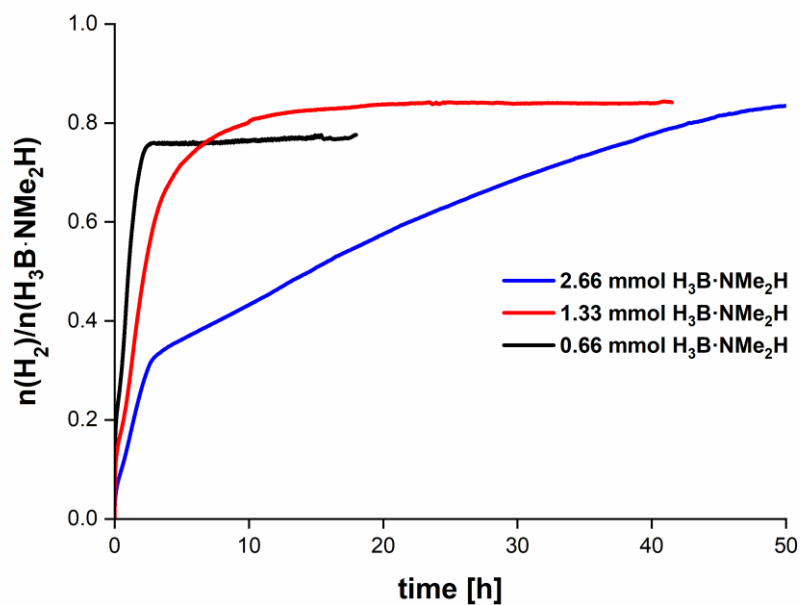

Figure S3. Volumetric curves of dehydrocoupling of  $\text{H}_3\text{B}\cdot\text{NMe}_2\text{H}$  with complex  $1/\text{MeLi}$  using different substrate concentrations. Conditions: room temperature, toluene, 2.5 mol%  $1$ , 5.2 mol%  $\text{MeLi}$ .

### 1.4. Dehydrocoupling of $\text{H}_3\text{B}\cdot\text{NMe}_2\text{H}$ with $1/\text{MeLi}$ ; THF inhibition experiments

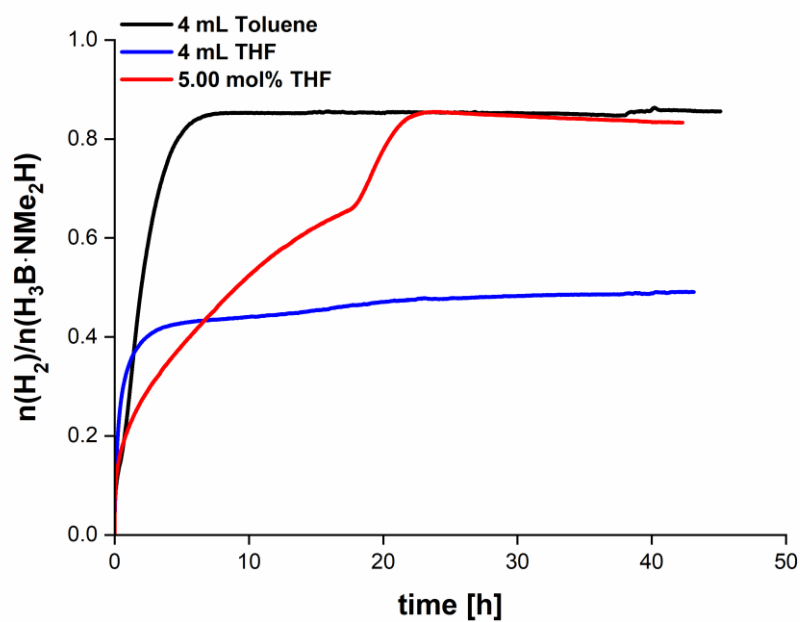

Figure S4. Volumetric curves of dehydrocoupling of  $\text{H}_3\text{B}\cdot\text{NMe}_2\text{H}$  with complex  $1/\text{MeLi}$ . Conditions: room temperature, toluene, 2.5 mol%  $1$ , 5.2 mol%  $\text{MeLi}$ .

## 1.5. Comparison of dehydrocoupling of deuterated amine boranes with complex 1/MeLi

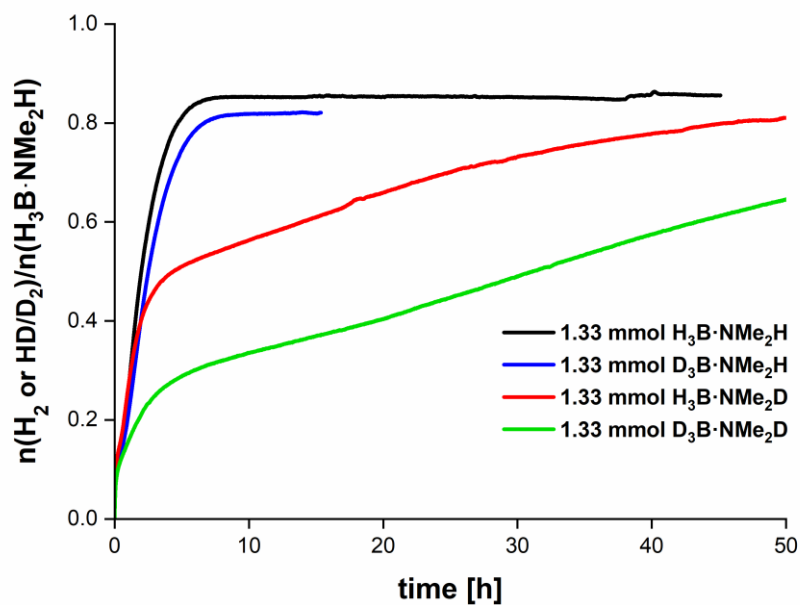

Figure S5. Volumetric curves of dehydrocoupling of deuterated amine boranes with complex 1/MeLi. Conditions: room temperature, toluene, 2.5 mol% 1, 5.2 mol% MeLi, [substrate] = 0.33 M.

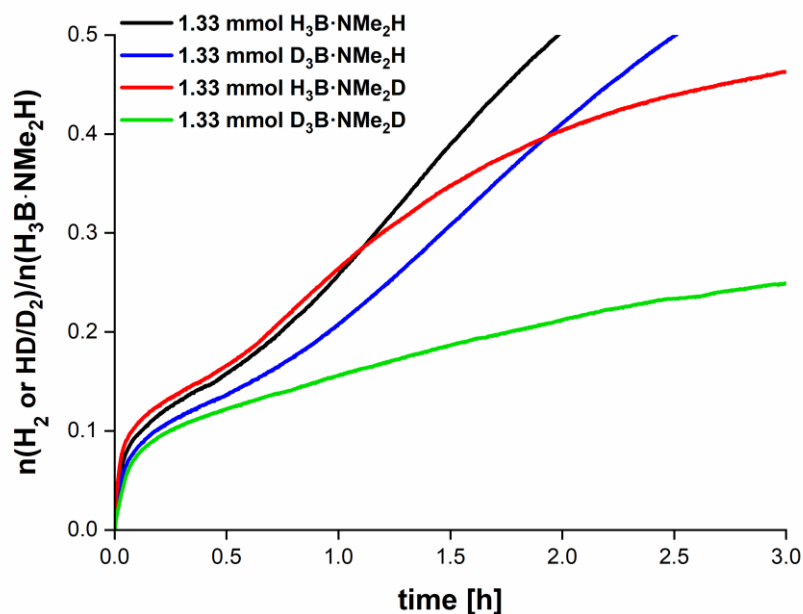

Figure S6. Enlargement of the volumetric curves (Figure S5) of dehydrocoupling of deuterated amine boranes with complex 1/MeLi. Conditions: room temperature, toluene, 2.5 mol% 1, 5.2 mol% MeLi, [substrate] = 0.33 M.

## 2. Crystallographic details

Table S1. Crystallographic details of **4**, **5**, **7** and **10**.

|                                             | <b>4</b>                  | <b>5</b>                              | <b>7</b>               | <b>10</b>            |
|---------------------------------------------|---------------------------|---------------------------------------|------------------------|----------------------|
| Chem. Formula                               | $C_{33}H_{50}N_2Si_2Zr_2$ | $C_{30.11}H_{41.33}C_{10.89}Si_2Zr_2$ | $C_{29}H_{40}Si_2Zr_2$ | $C_{33}H_{40}SiZr_2$ |
| Form. Wght [g mol <sup>-1</sup> ]           | 713.37                    | 673.45                                | 627.23                 | 647.18               |
| Colour                                      | yellow-orange             | orange                                | red                    | red                  |
| Cryst. system                               | monoclinic                | triclinic                             | triclinic              | monoclinic           |
| Space group                                 | $P2_1/c$                  | $P\bar{1}$                            | $P\bar{1}$             | $P2_1/n$             |
| a [Å]                                       | 16.1662(15)               | 12.9147(8)                            | 8.4309(6)              | 8.3405(2)            |
| b [Å]                                       | 12.7556(12)               | 16.0454(11)                           | 8.6096(6)              | 25.5764(6)           |
| c [Å]                                       | 16.3557(15)               | 16.0971(10)                           | 10.3197(8)             | 14.2103(4)           |
| $\alpha$ [°]                                | 90                        | 73.455(3)                             | 89.1575(17)            | 90                   |
| $\beta$ [°]                                 | 96.7815(18)               | 74.142(3)                             | 78.2307(18)            | 100.188(2)           |
| $\gamma$ [°]                                | 90                        | 82.668(3)                             | 74.7766(17)            | 90                   |
| V [Å <sup>3</sup> ]                         | 3349.1(5)                 | 3071.4(3)                             | 706.99(9)              | 2983.54(13)          |
| Z                                           | 4                         | 4                                     | 1                      | 4                    |
| $\rho_{\text{calc.}}$ [g cm <sup>-3</sup> ] | 1.415                     | 1.456                                 | 1.473                  | 1.441                |
| $\mu$ [mm <sup>-1</sup> ]                   | 0.718                     | 0.851                                 | 6.955                  | 0.758                |
| T [K]                                       | 150(2)                    | 150(2)                                | 150(2)                 | 150(2)               |
| radiation type                              | Mo K $\alpha$             | Mo K $\alpha$                         | Cu K $\alpha$          | Mo K $\alpha$        |
| reflections measured                        | 55376                     | 159799                                | 15302                  | 54638                |
| independent reflections                     | 8075                      | 14071                                 | 2475                   | 7938                 |
| observed reflections with $I > 2\sigma(I)$  | 7008                      | 12879                                 | 2467                   | 6546                 |
| $R_{\text{int.}}$                           | 0.0295                    | 0.0284                                | 0.0401                 | 0.0255               |
| F(000)                                      | 1480                      | 1380                                  | 322                    | 1328                 |
| $R_1 (I > 2\sigma(I))$                      | 0.0449                    | 0.0274                                | 0.0327                 | 0.0265               |
| wR <sub>2</sub> (all data)                  | 0.1216                    | 0.0706                                | 0.0890                 | 0.0712               |
| GOF on $F^2$                                | 1.040                     | 1.174                                 | 1.096                  | 1.028                |
| Parameters                                  | 549                       | 682                                   | 163                    | 365                  |
| CCDC number                                 | 2046121                   | 2046122                               | 2069777                | 2069778              |

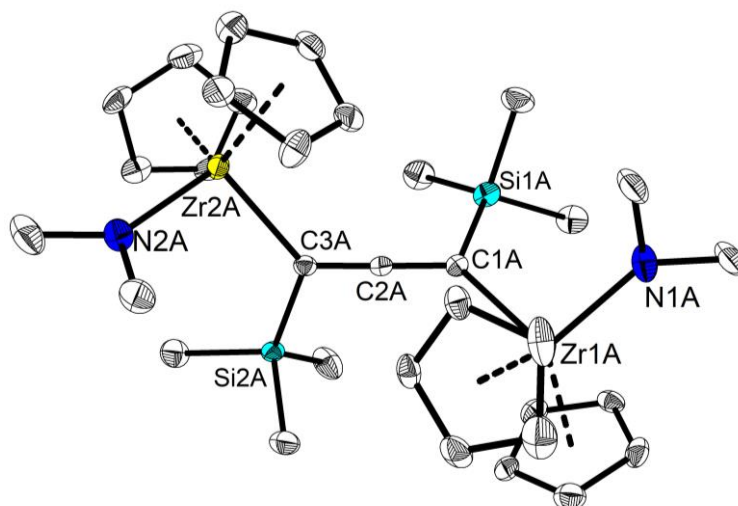

**Figure S7.** Molecular structure of complex **4**. Thermal ellipsoids correspond to 30% probability. Hydrogen atoms and the second position of the disordered part are omitted for clarity.

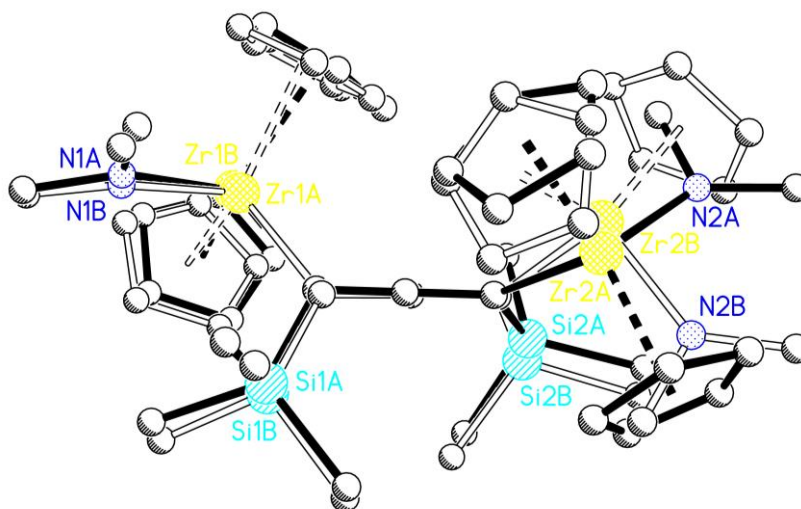

**Figure S8.** Ball and stick model of the molecular structure of complex **4**.

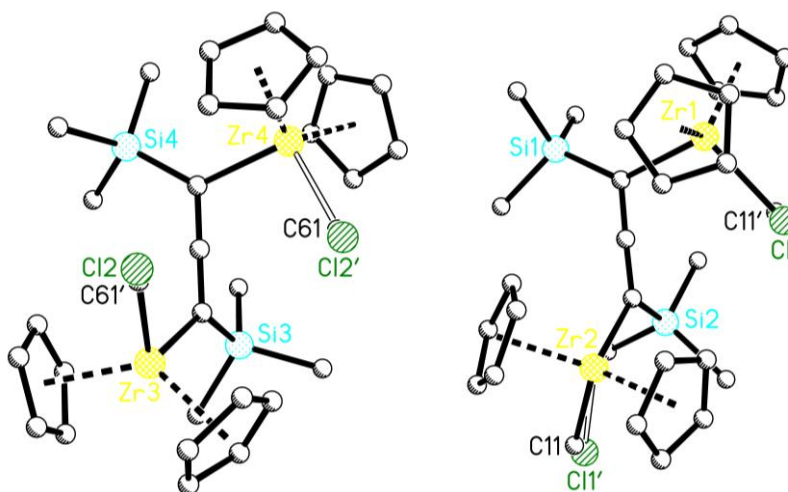

**Figure S9.** Ball and stick model of the molecular structure of complex **6**.

### 3. Details of NMR spectroscopy

#### 3.1. NMR spectra of complex 2

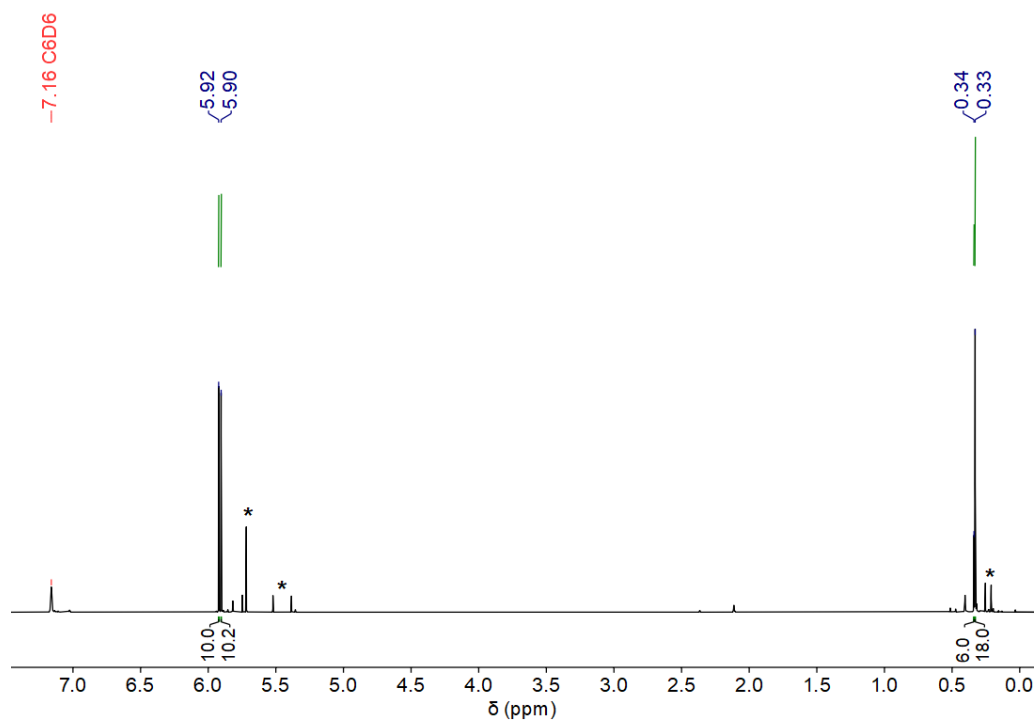

Figure S10. <sup>1</sup>H NMR spectrum of **2**, asterisk marks decomposition products (25 °C, benzene-*d*<sub>6</sub>, 300.20 MHz).

#### 3.2. NMR spectra of complex 4

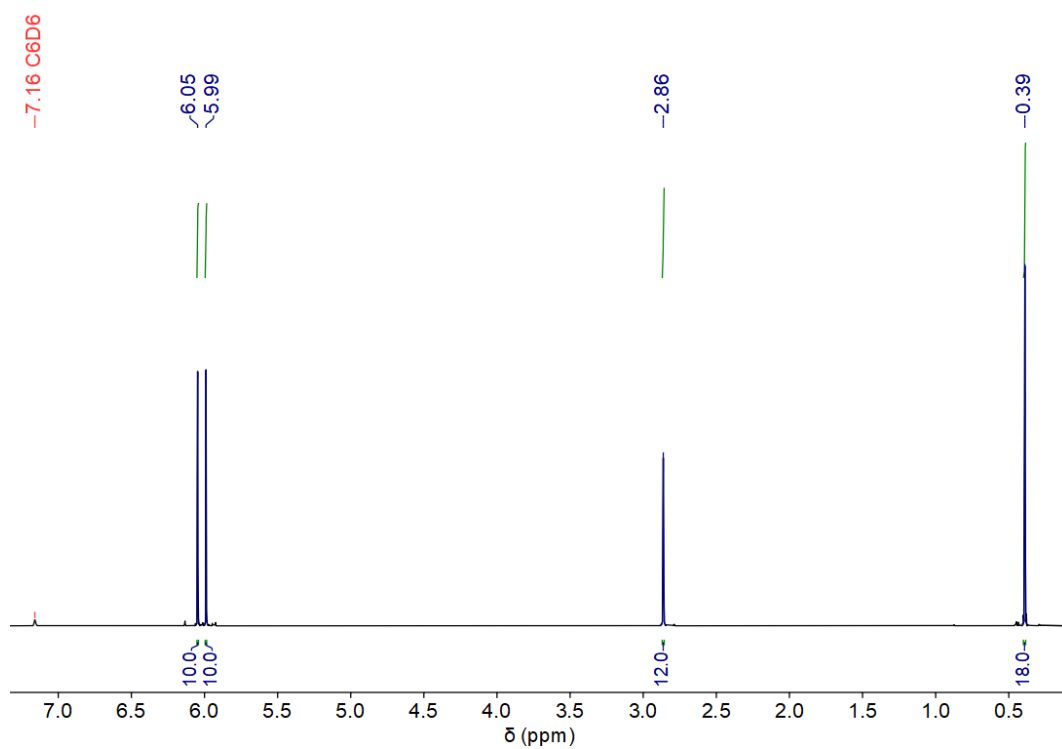

Figure S11. <sup>1</sup>H NMR spectrum of **4** (25 °C, benzene-*d*<sub>6</sub>, 300.13 MHz).

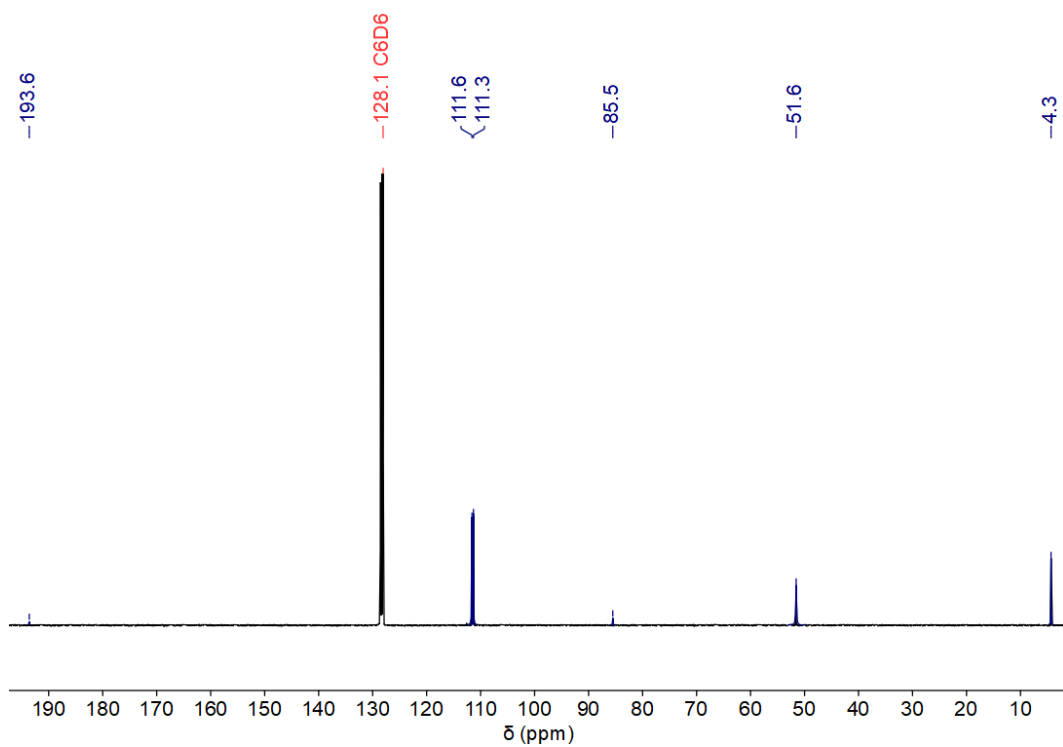

Figure S12.  $^{13}\text{C}$  NMR spectrum of **4** (25 °C, benzene- $d_6$ , 100.03 MHz).

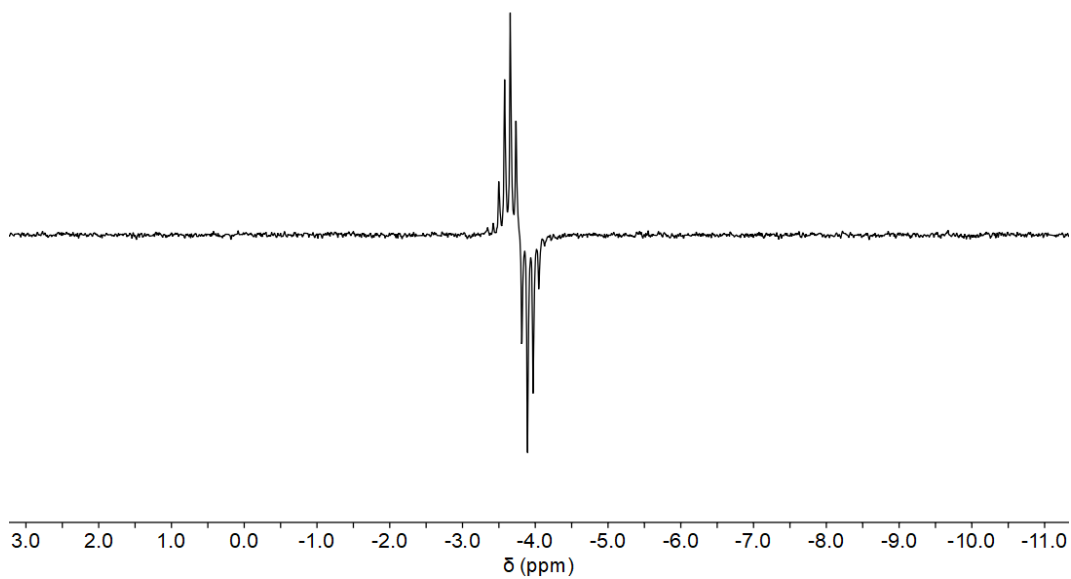

Figure S13.  $^{29}\text{Si}$  INEPT NMR spectrum of **4** (25 °C, benzene- $d_6$ , 79.5 MHz).



### 3.3. NMR spectra of complex 5

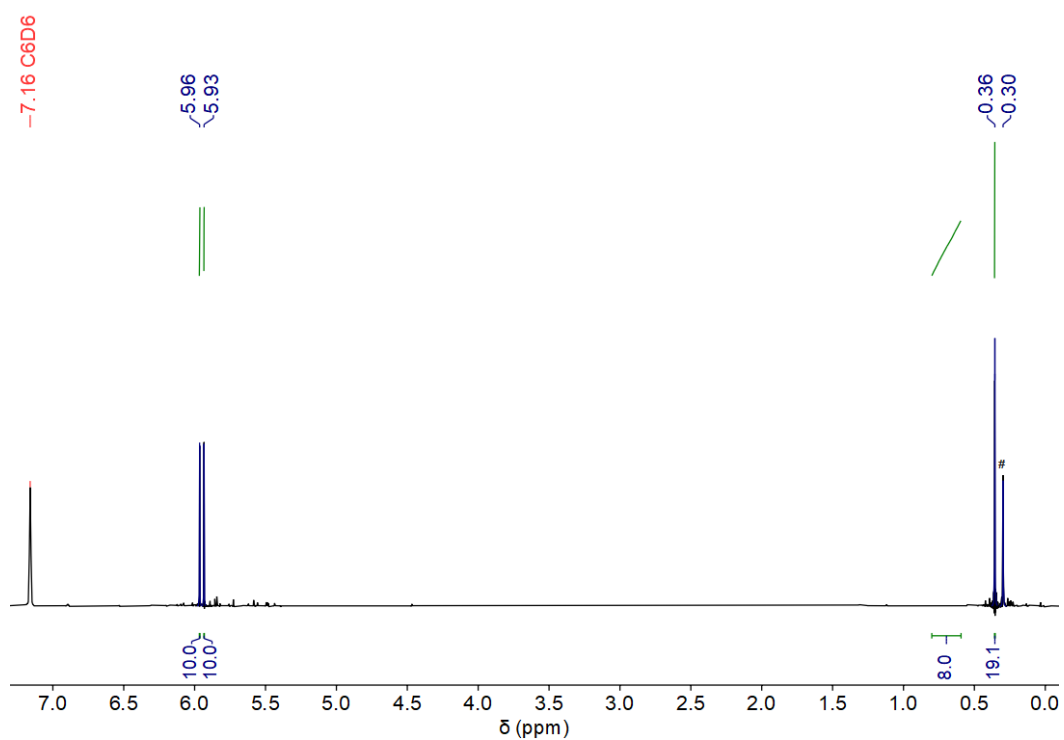

Figure S14.  $^1\text{H}$  NMR spectrum of **5** (25 °C, benzene- $d_6$ , 300.19 MHz). # indicates silicon grease.

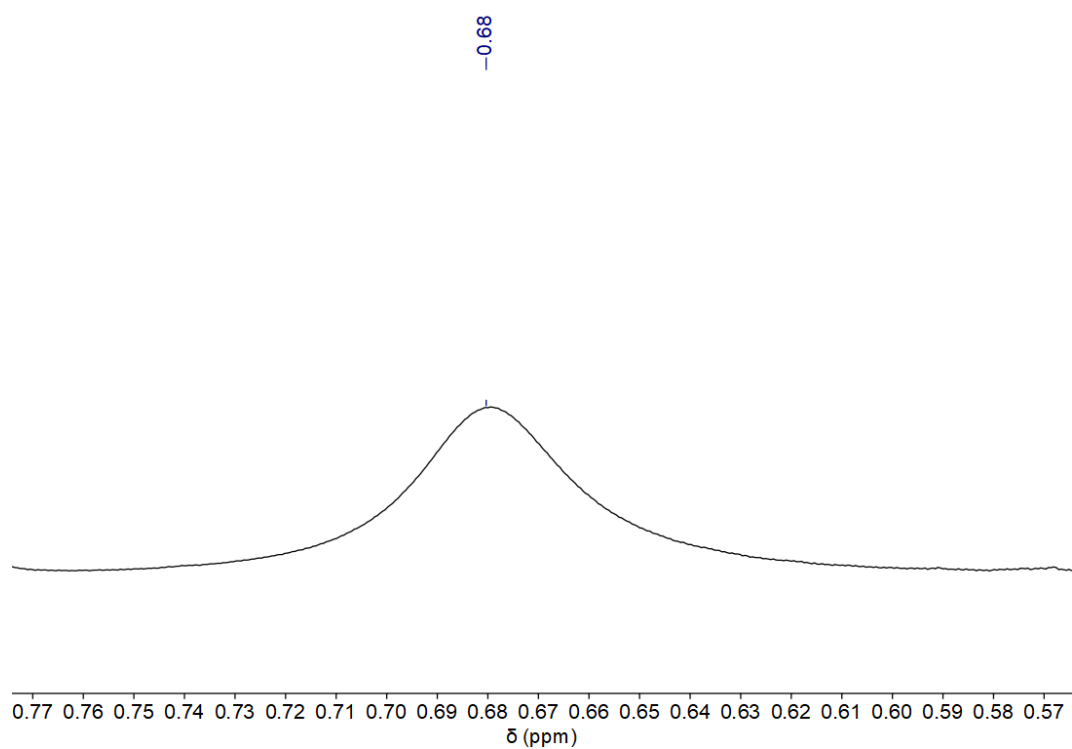

Figure S15.  $^1\text{H}\{^{11}\text{B}\}$  NMR spectrum of **5**, with greatly enlarged boron range (25 °C, benzene- $d_6$ , 300.19 MHz).

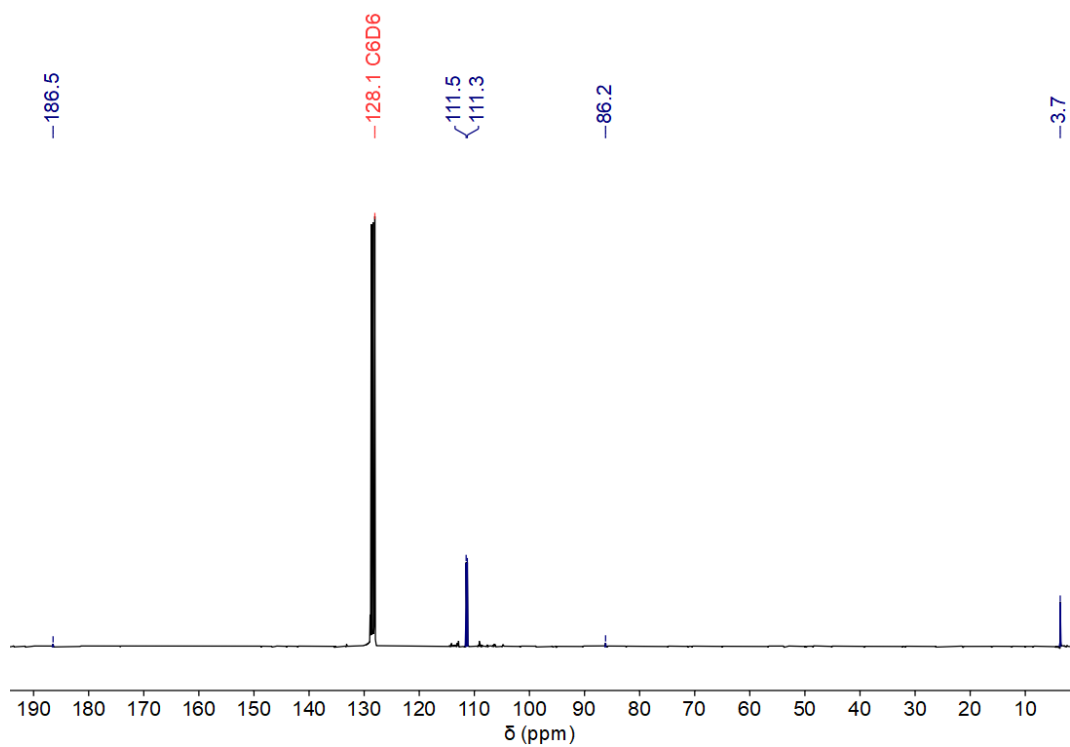

**Figure S16.**  $^{13}\text{C}$  NMR spectrum of **5** (25 °C, benzene- $d_6$ , 75.5 MHz).

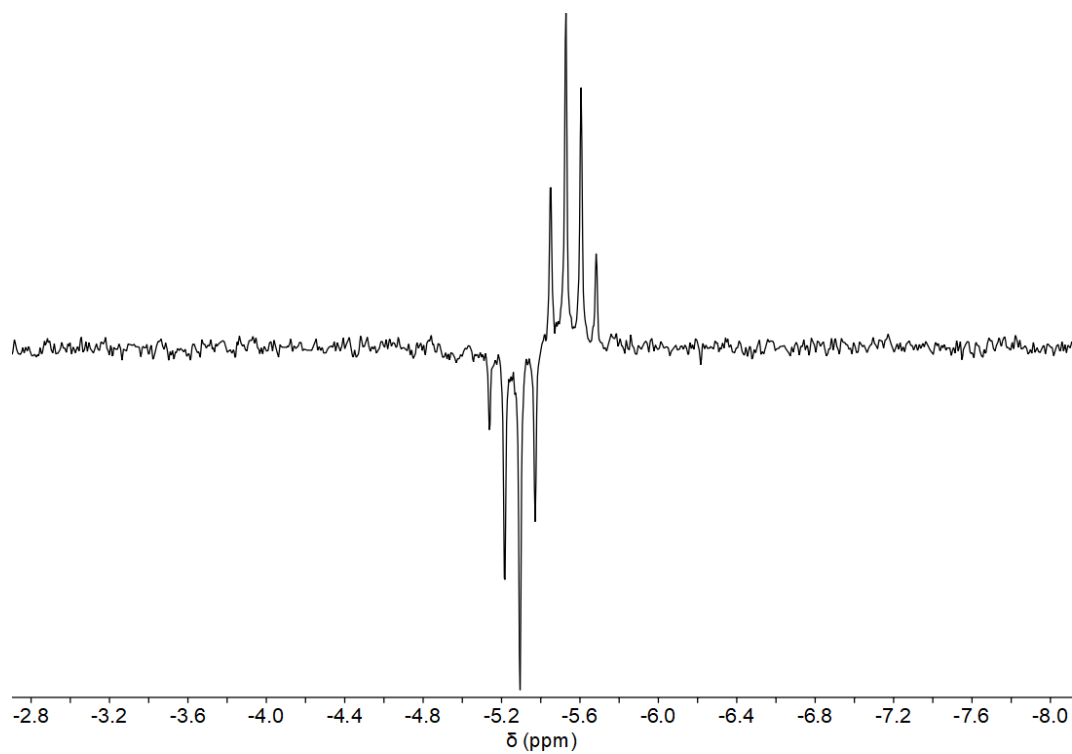

**Figure S17.**  $^{29}\text{Si}$  INEPT NMR spectrum of **5** (25 °C, benzene- $d_6$ , 59.6 MHz).

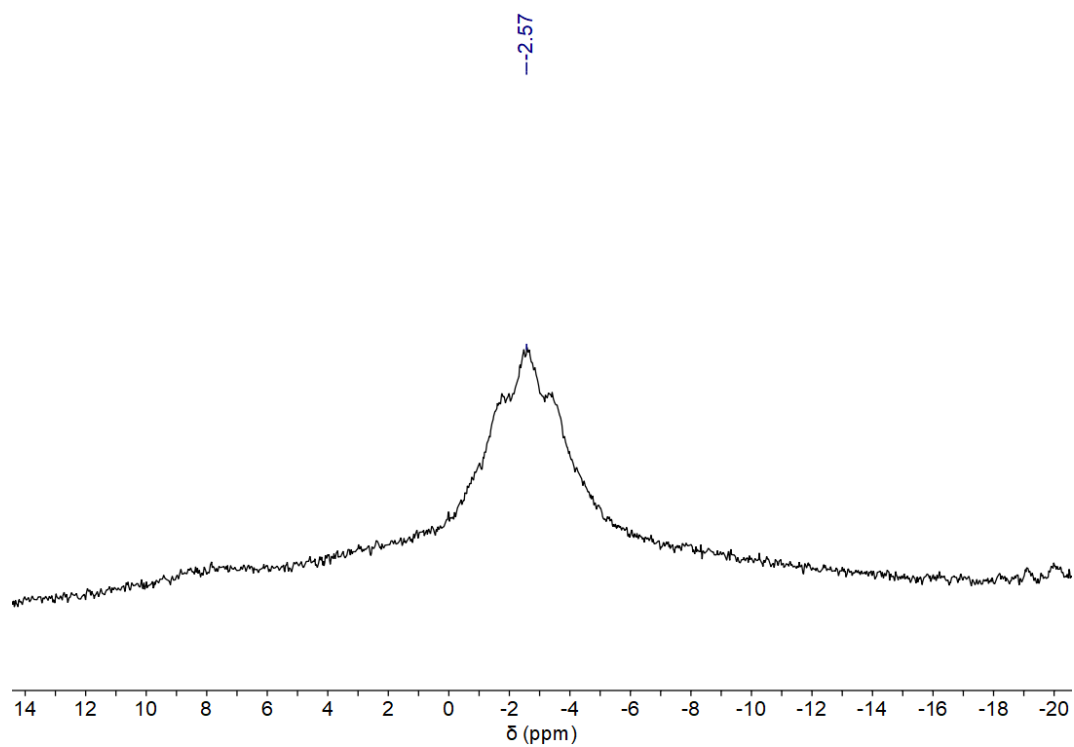

Figure S18.  $^{11}\text{B}$  NMR spectrum of **5** (25 °C, benzene- $d_6$ , 96.32 MHz).

### 3.4. NMR spectra of complex **6**

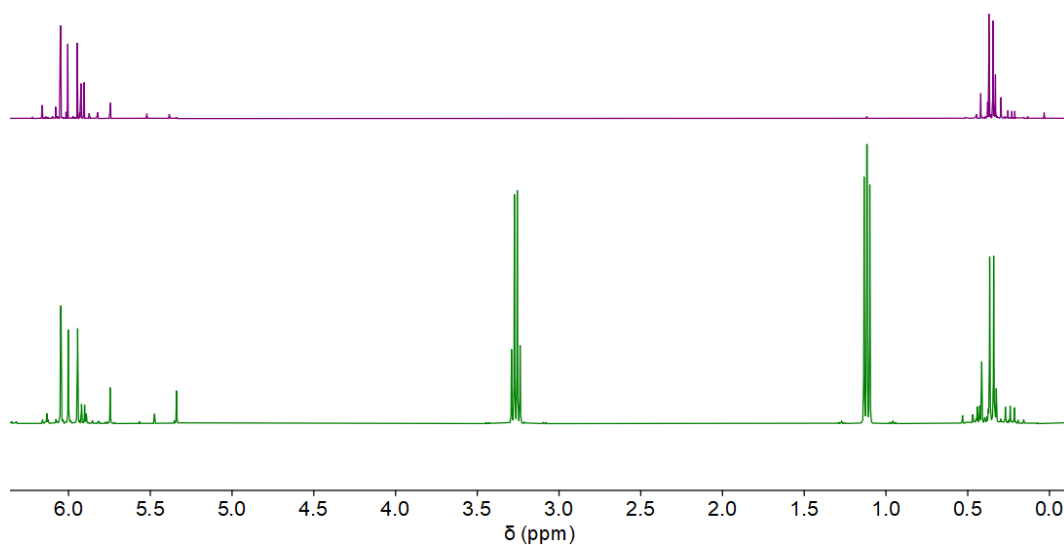

Figure S19.  $^1\text{H}$  NMR spectra of **6**. Top: room temperature, benzene, 0.43 mmol **1**, 0.43 mmol MeLi (25 °C, benzene- $d_6$ , 300.20 MHz). Bottom: room temperature, diethyl ether, 0.02 mmol **1**, 0.02 mmol MeLi as single crystals (25 °C, benzene- $d_6$ , 400.13 MHz).

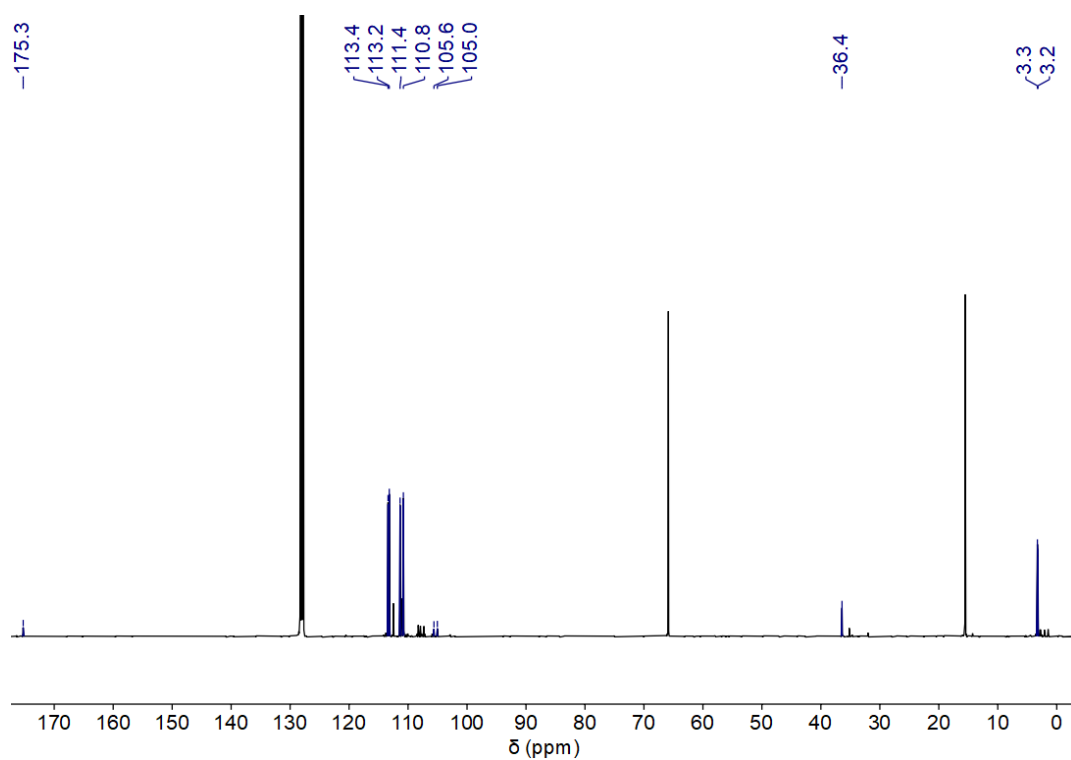

**Figure S20.** <sup>13</sup>C NMR spectrum of **6** (25 °C, benzene-*d*<sub>6</sub>, 100.03 MHz).

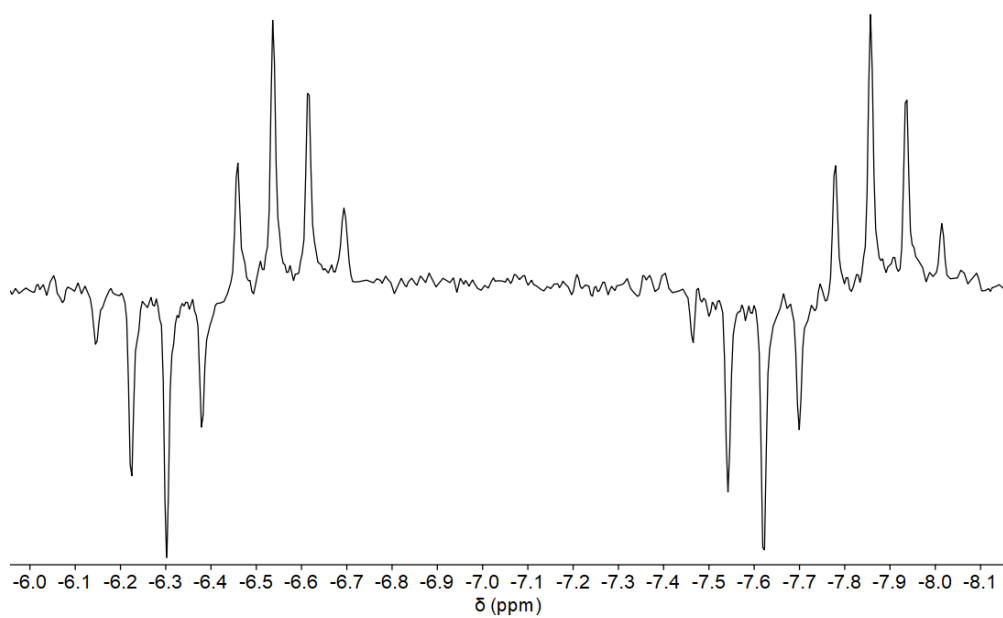

**Figure S21.** <sup>29</sup>Si INEPT NMR spectrum of **6** (25 °C, benzene-*d*<sub>6</sub>, 79.5 MHz).

### 3.5. NMR spectra of complex 7

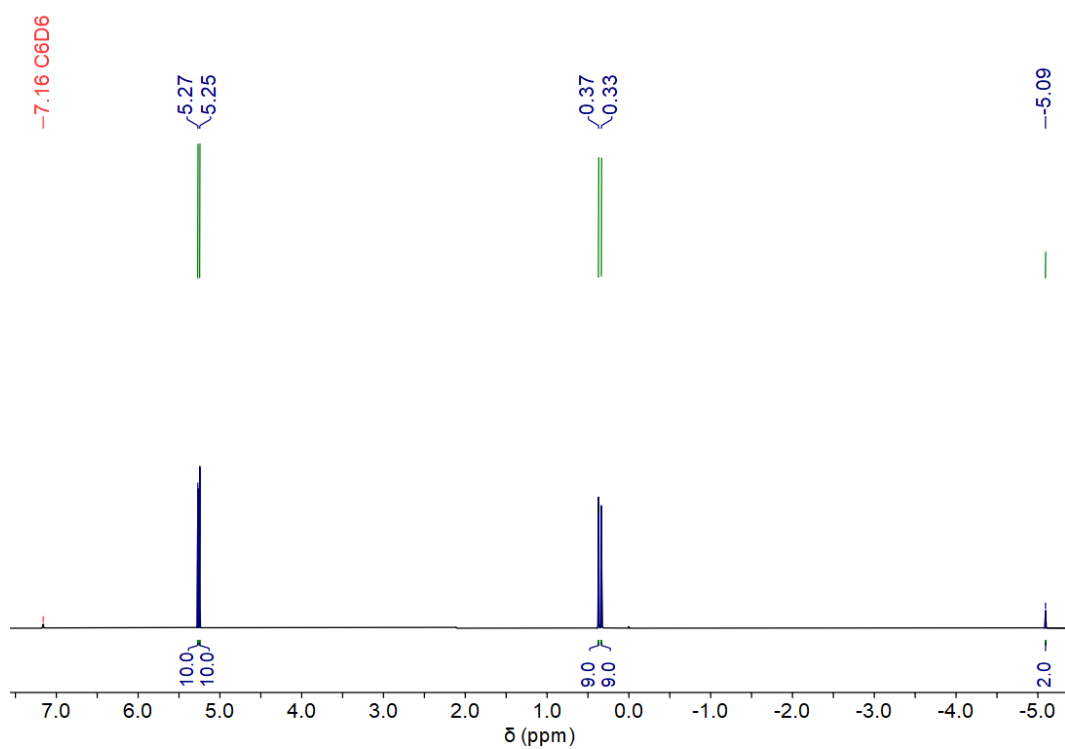

Figure S22.  $^1\text{H}$  NMR spectrum of 7 (25 °C, benzene- $d_6$ , 400.13 MHz).

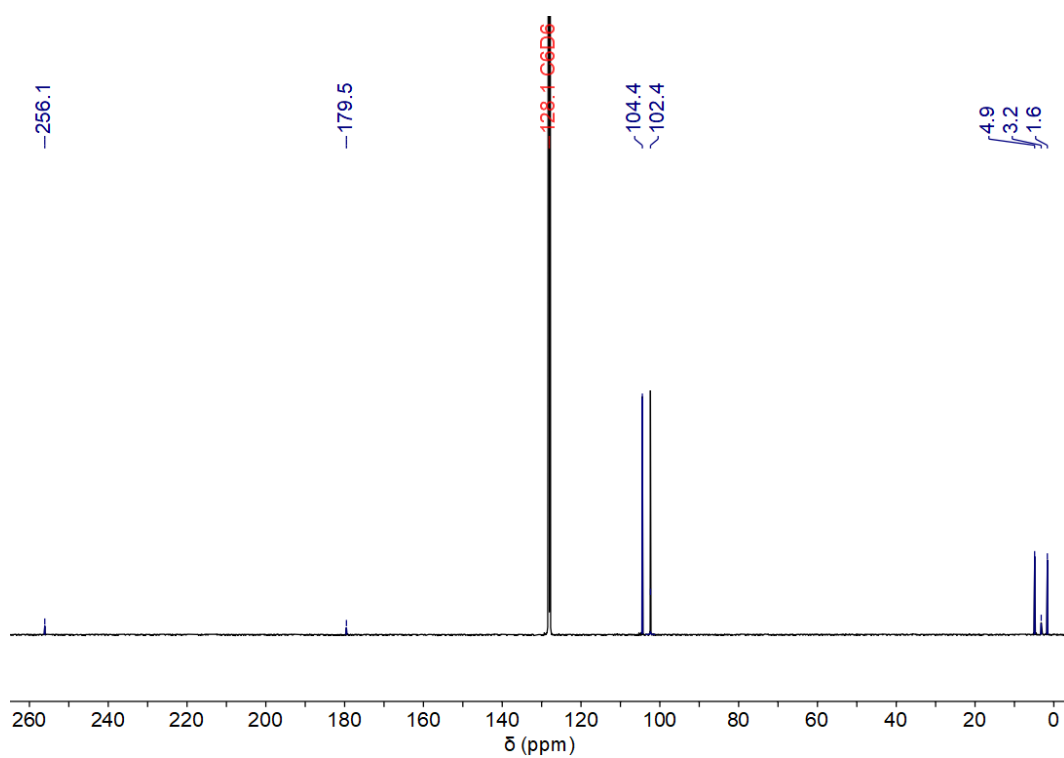

Figure S23.  $^{13}\text{C}$  NMR spectrum of 7 (25 °C, benzene- $d_6$ , 100.6 MHz).

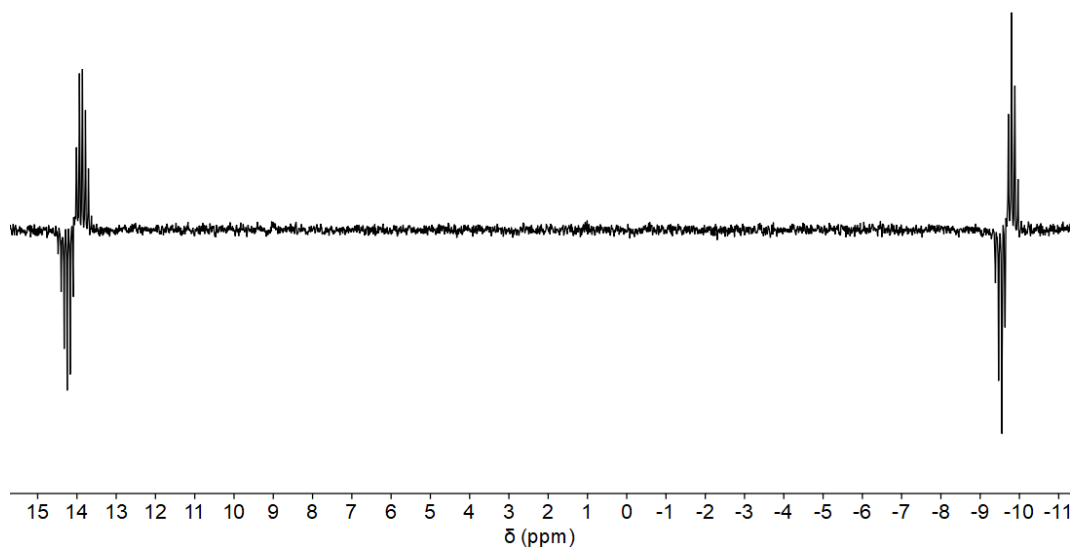

Figure S24.  $^{29}\text{Si}$  INEPT NMR spectrum of **7** (25 °C, benzene- $d_6$ , 79.5 MHz).

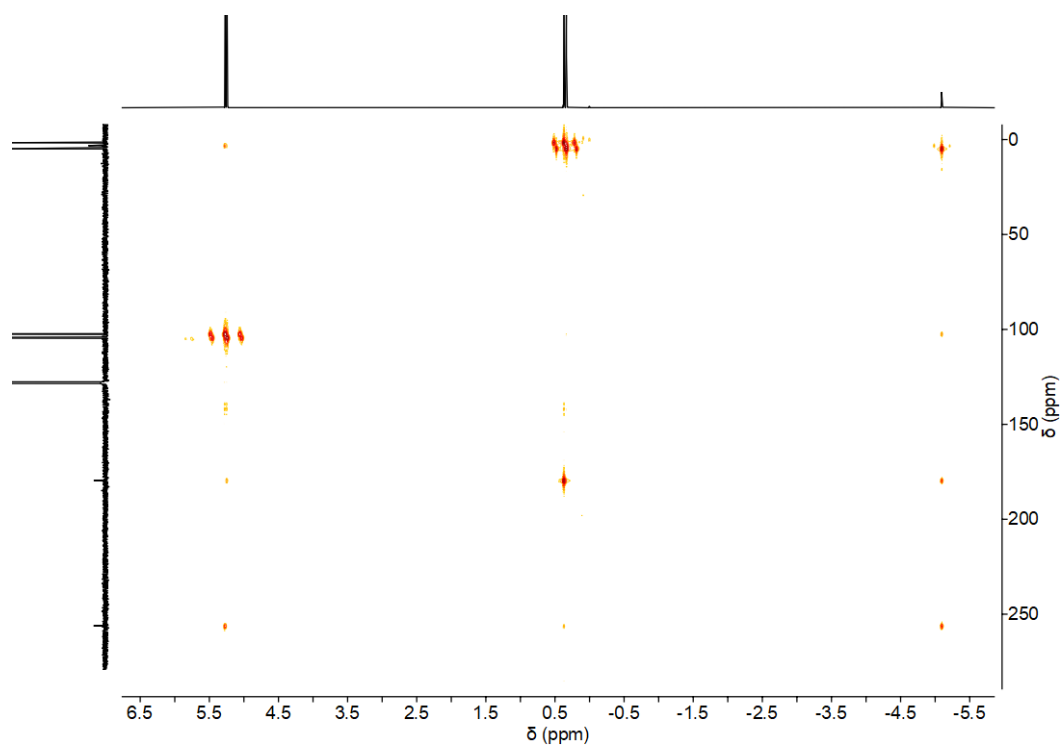

Figure S25.  $^1\text{H}$   $^{13}\text{C}$  HMBC NMR spectrum of **7** (25 °C, benzene- $d_6$ , 400.13 MHz).

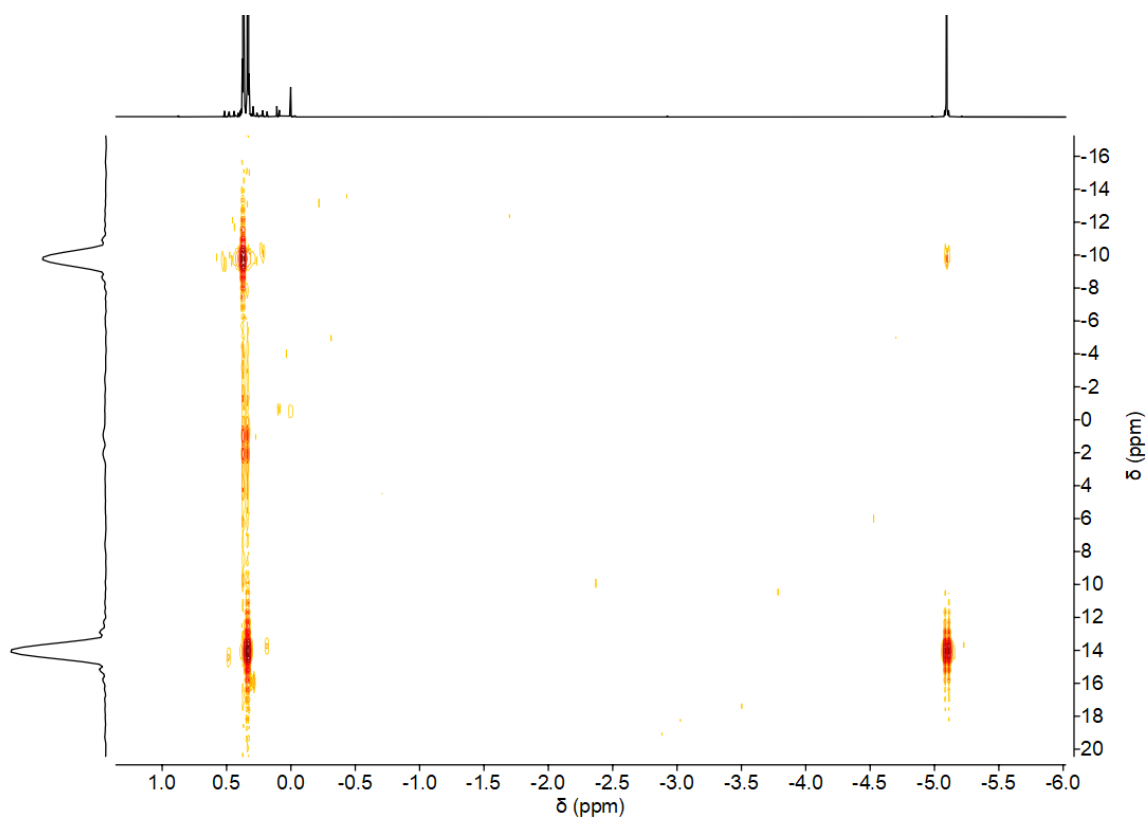

Figure S26.  $^1\text{H}$   $^{29}\text{Si}$  HMBC NMR spectrum of **7** (25 °C, benzene- $d_6$ , 400.13 MHz).

### 3.6. NMR spectra of complex **8**

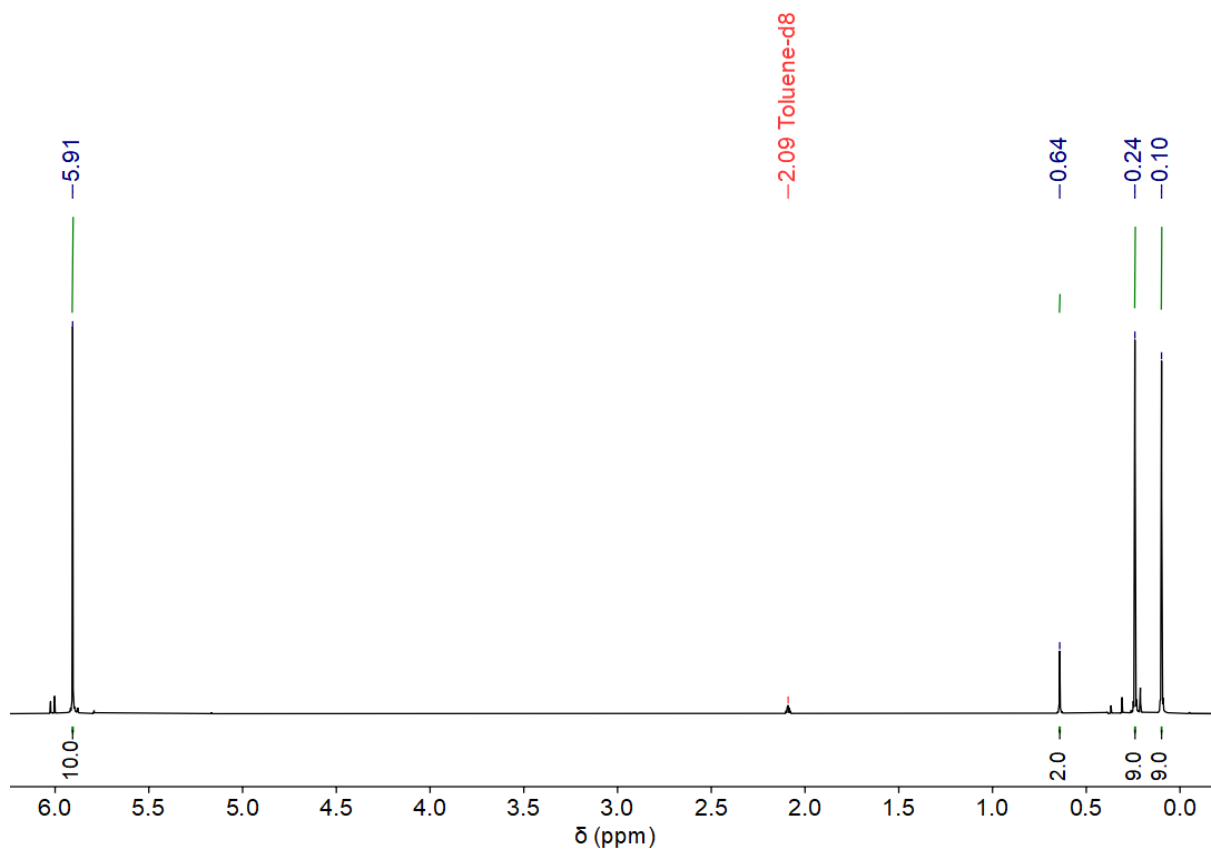

Figure S27.  $^1\text{H}$  NMR spectrum of **8** (25 °C, toluene- $d_8$ , 400.13 MHz).

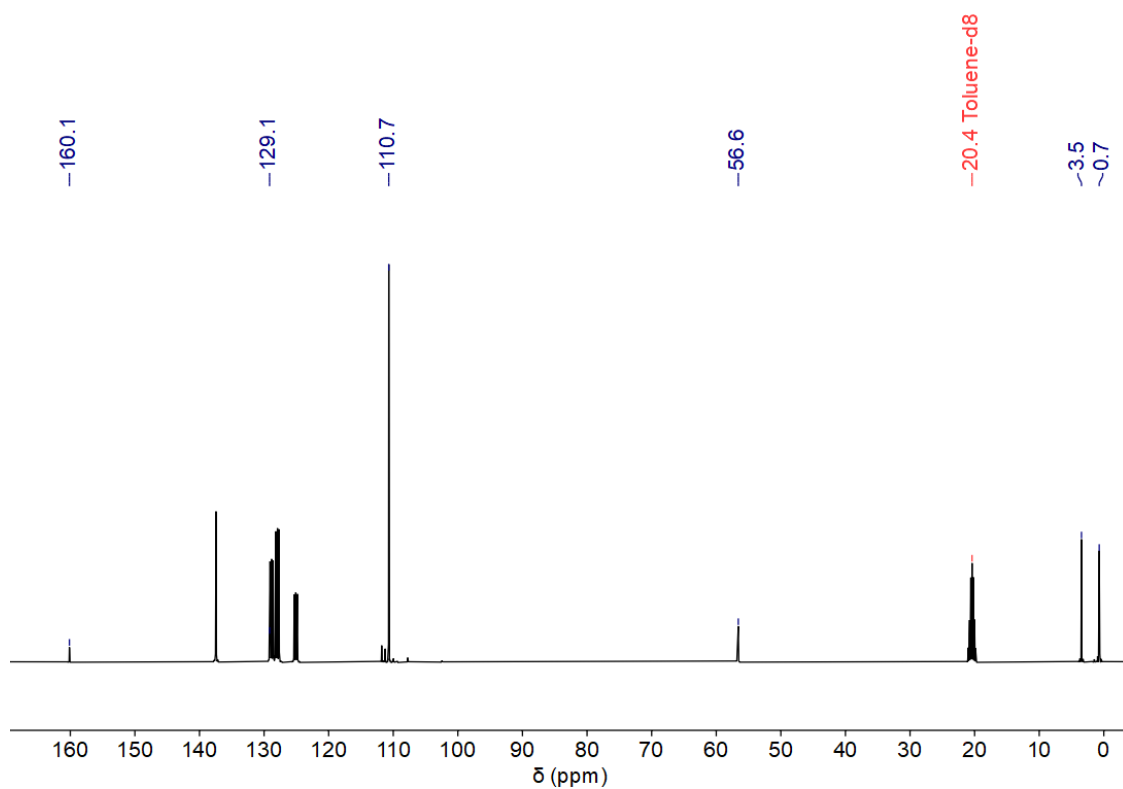

Figure S28.  $^{13}\text{C}$  NMR spectrum of **8** (25 °C, toluene- $d_8$ , 100.63 MHz).

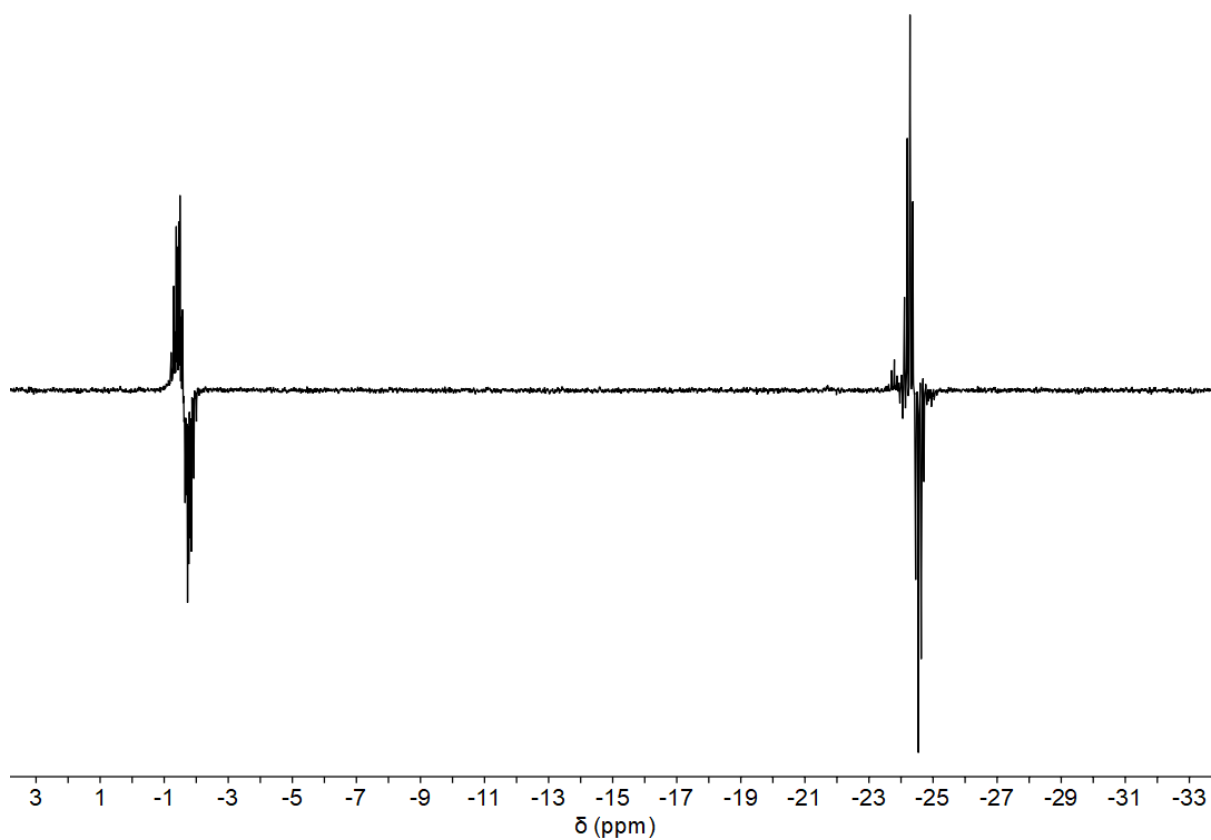

Figure S29.  $^{29}\text{Si}$  INEPT NMR spectrum of **8** (25 °C, toluene- $d_8$ , 59.63 MHz).



### 3.7. NMR spectra of complex 9 via route 1

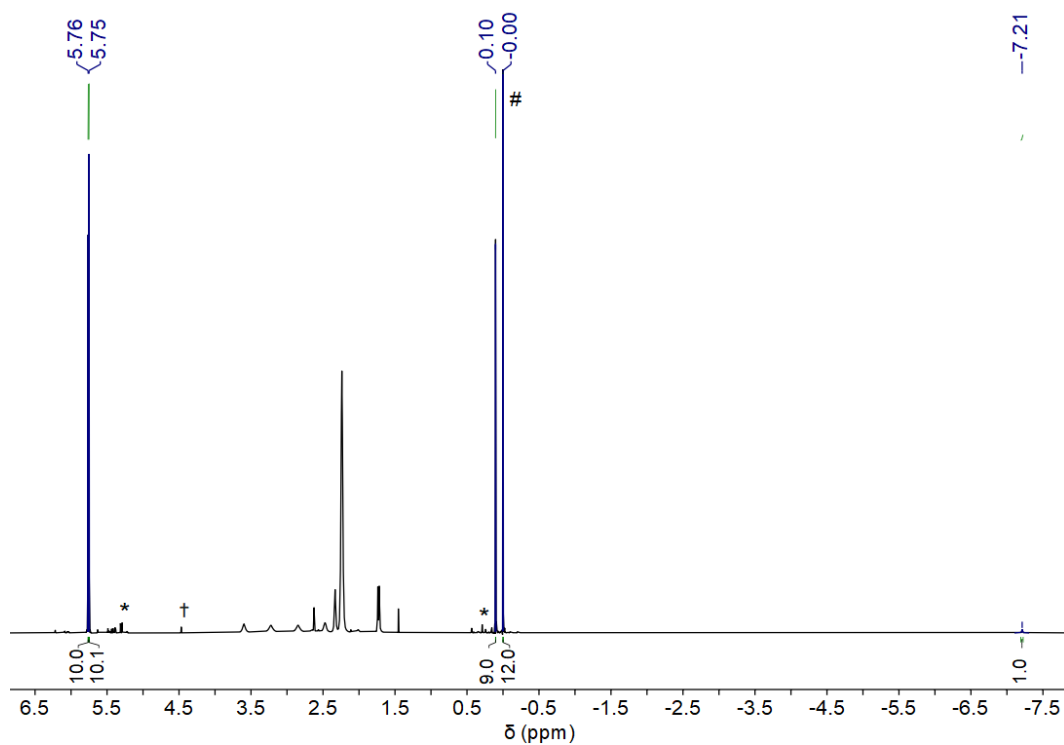

**Figure S30.**  $^1\text{H}$  NMR spectrum of the reaction mixture obtained from route 1 (25 °C, benzene- $d_6$ , 300.20 MHz). The region 1.40 – 3.50 ppm shows the products of dehydrocoupling of  $\text{H}_3\text{B}\cdot\text{NMe}_2\text{H}$ . #  $\text{SiMe}_4$ , \* decomposition products, †  $\text{H}_2$ .

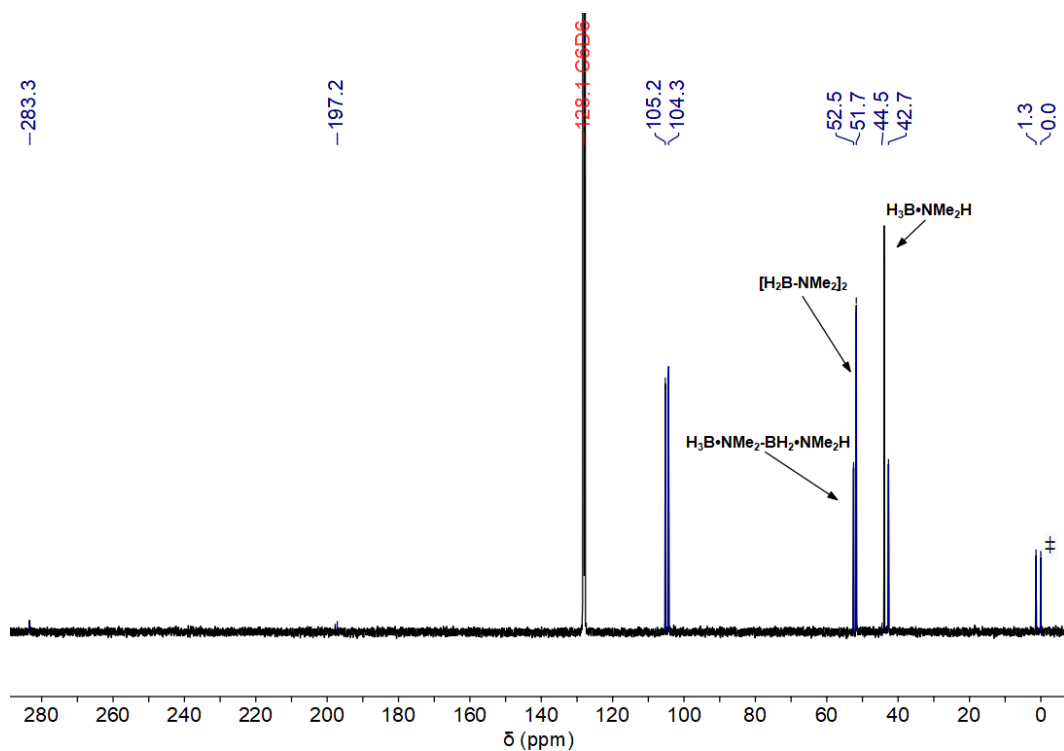

**Figure S31.**  $^{13}\text{C}$  NMR spectrum of the reaction mixture obtained from route 1 (25 °C, benzene- $d_6$ , 100.63 MHz). †  $\text{SiMe}_4$ .

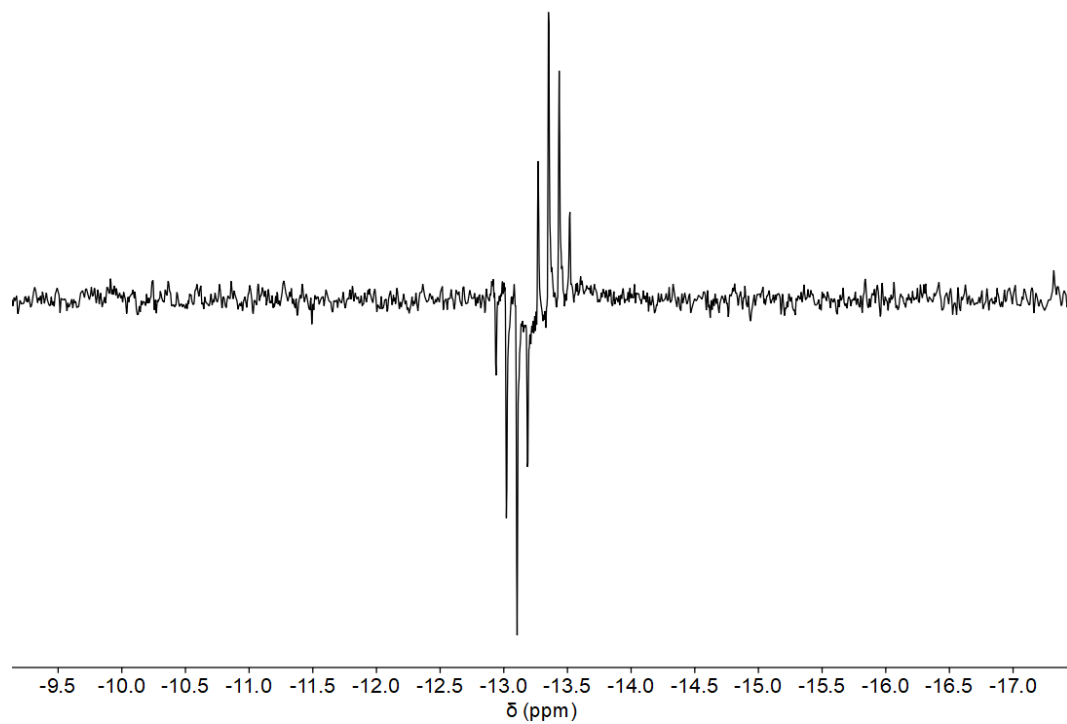

Figure S32.  $^{29}\text{Si}$  INEPT NMR spectrum of **9** (25 °C, benzene- $d_6$ , 79.49 MHz).

### 3.8. NMR spectra of complex **9** via route 2

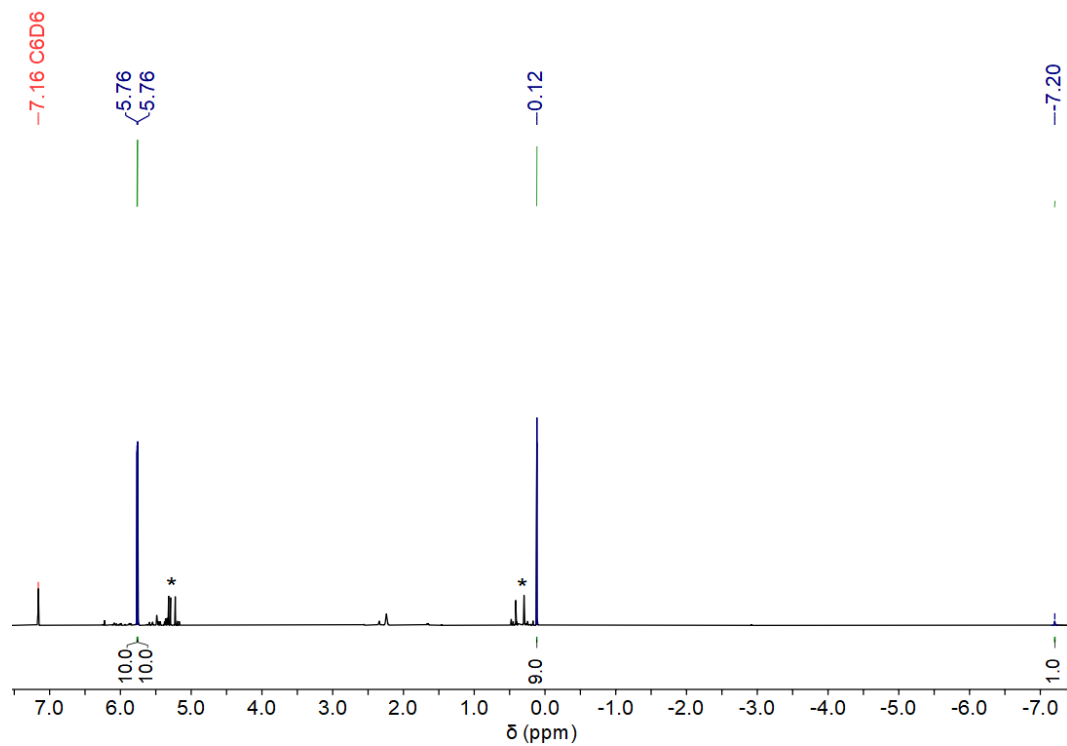

Figure S33.  $^1\text{H}$  NMR spectrum of **9** (25 °C, benzene- $d_6$ , 400.13 MHz). \* decomposition products.

### 3.9. NMR spectra of complex 10

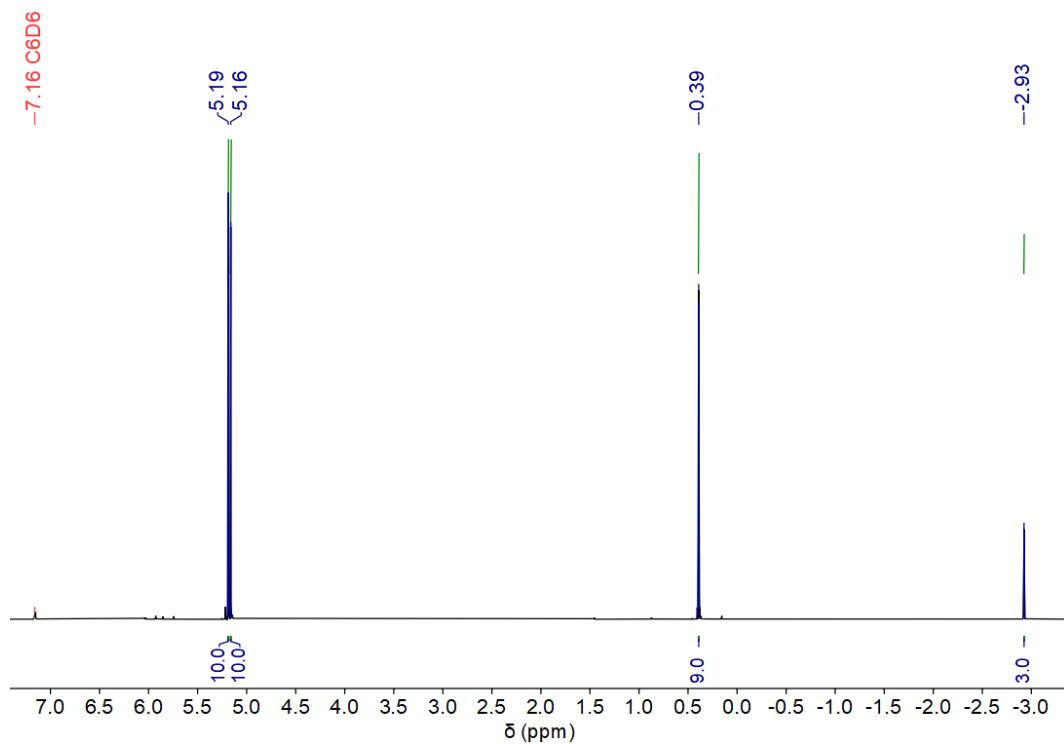

Figure S34. <sup>1</sup>H NMR spectrum of **10** (25 °C, benzene-*d*<sub>6</sub>, 400.13 MHz).

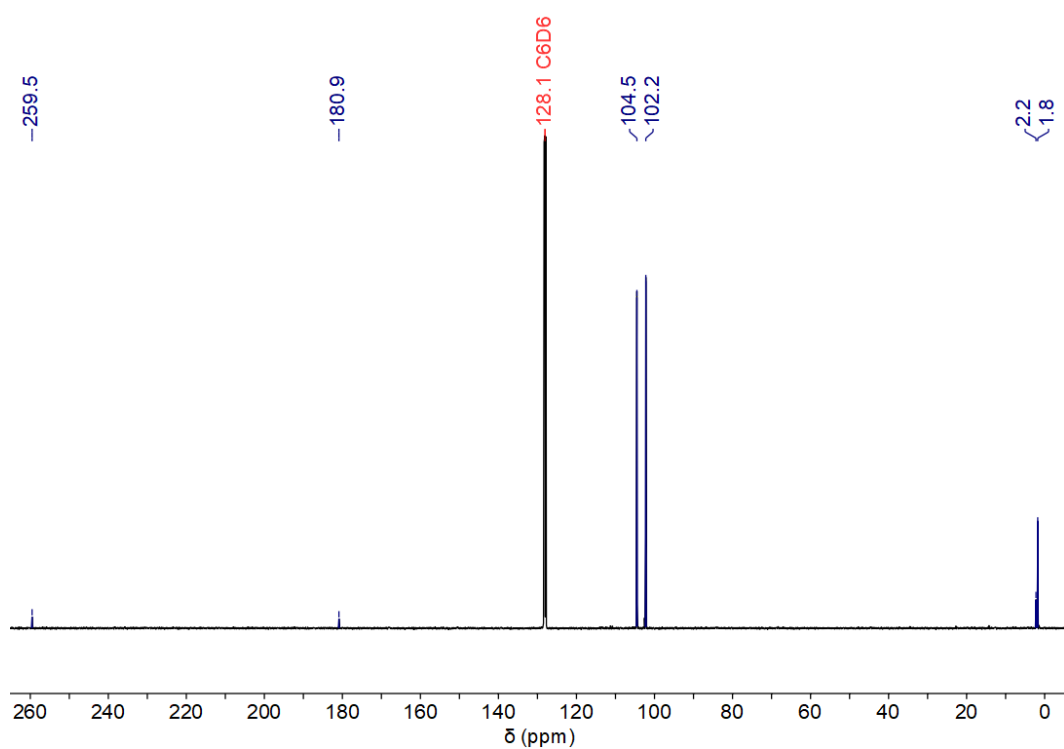

Figure S35. <sup>13</sup>C NMR spectrum of **10** (25 °C, benzene-*d*<sub>6</sub>, 75.47 MHz).

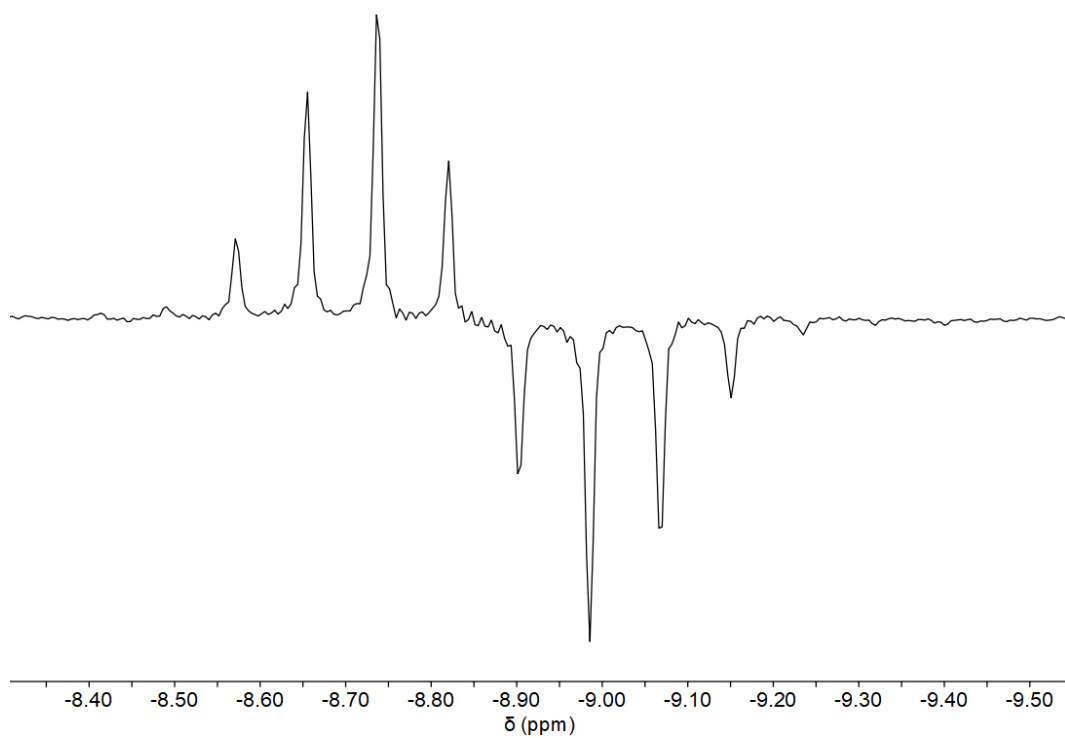

Figure S36.  $^{29}\text{Si}$  INEPT NMR spectrum of **10** (25 °C, benzene- $d_6$ , 59.63 MHz).

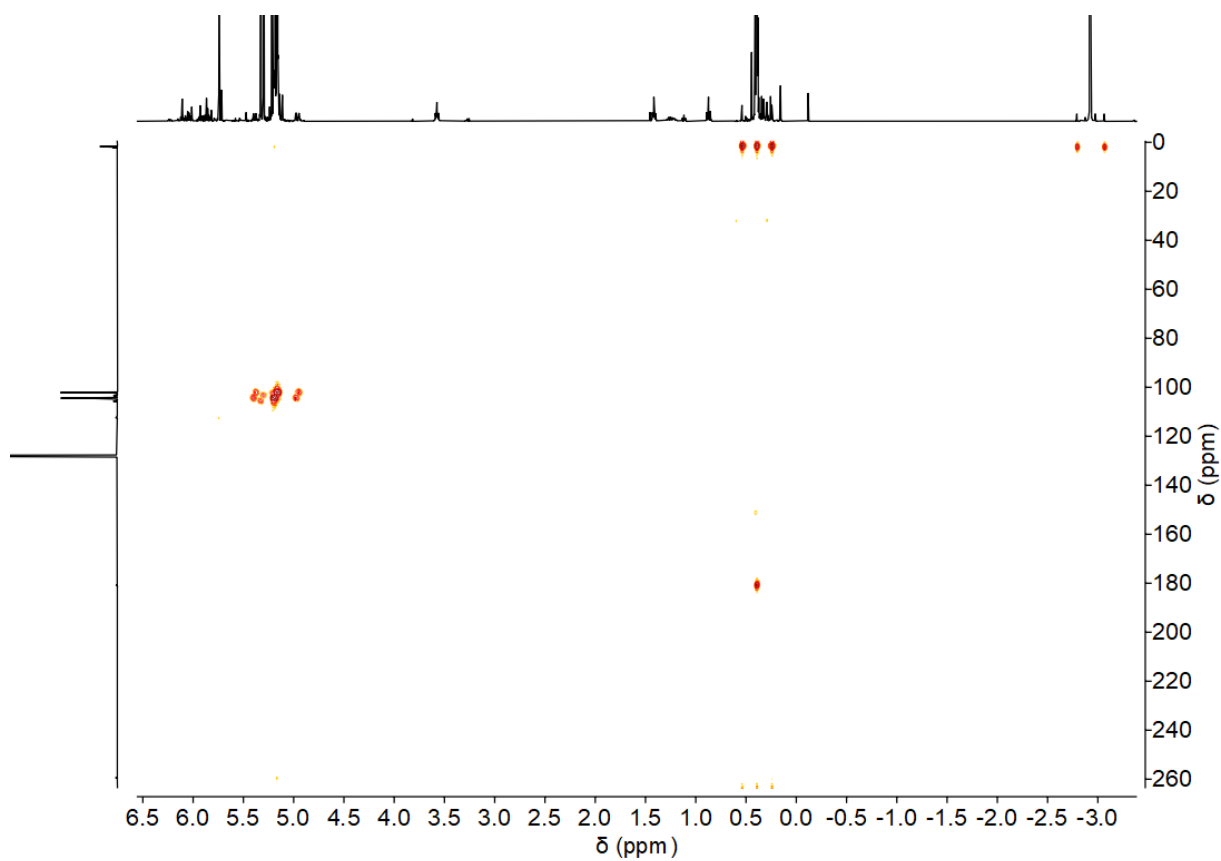

Figure S37.  $^1\text{H}$   $^{13}\text{C}$  HMBC NMR spectrum of **10** (25 °C, benzene- $d_6$ , 400.13 MHz).

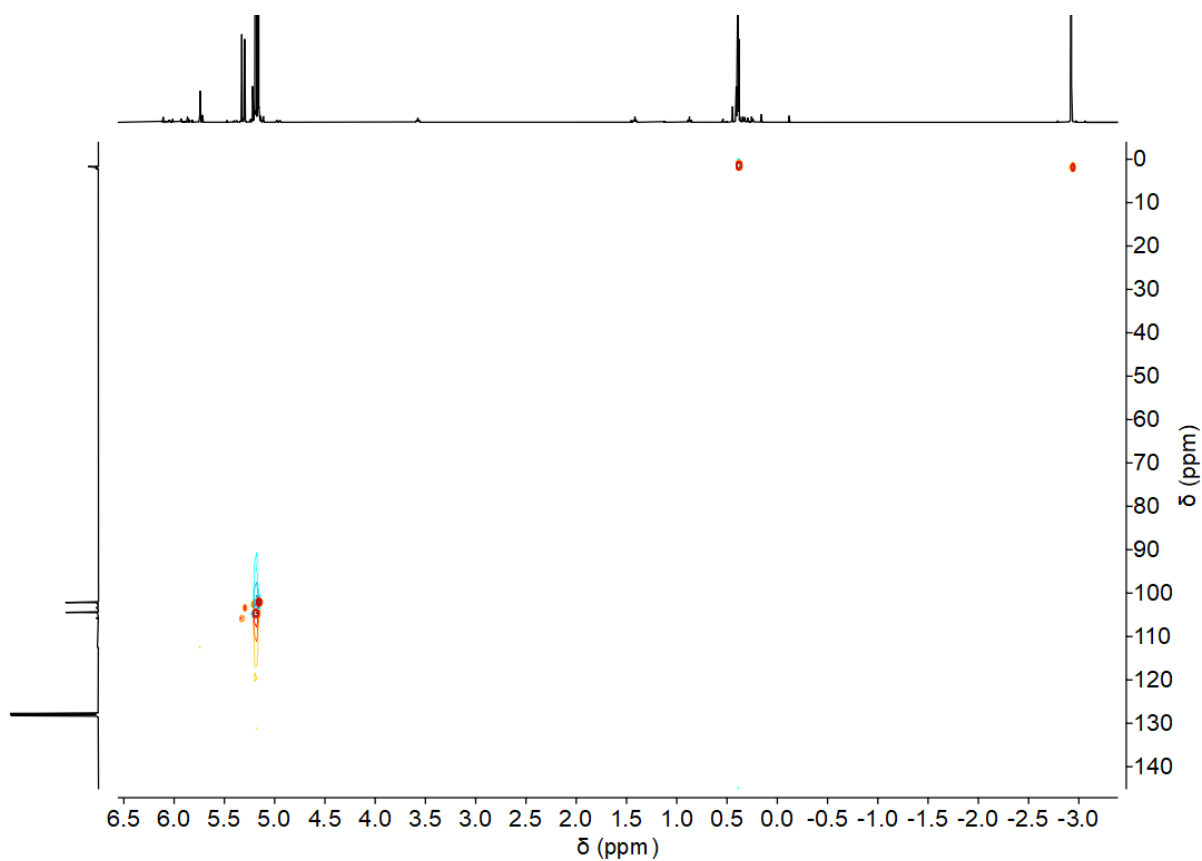

Figure S38.  $^1\text{H}$   $^{13}\text{C}$  HSQC NMR spectrum of **10** (25 °C, benzene- $d_6$ , 400.13 MHz).

### 3.10. NMR spectra of complex 11

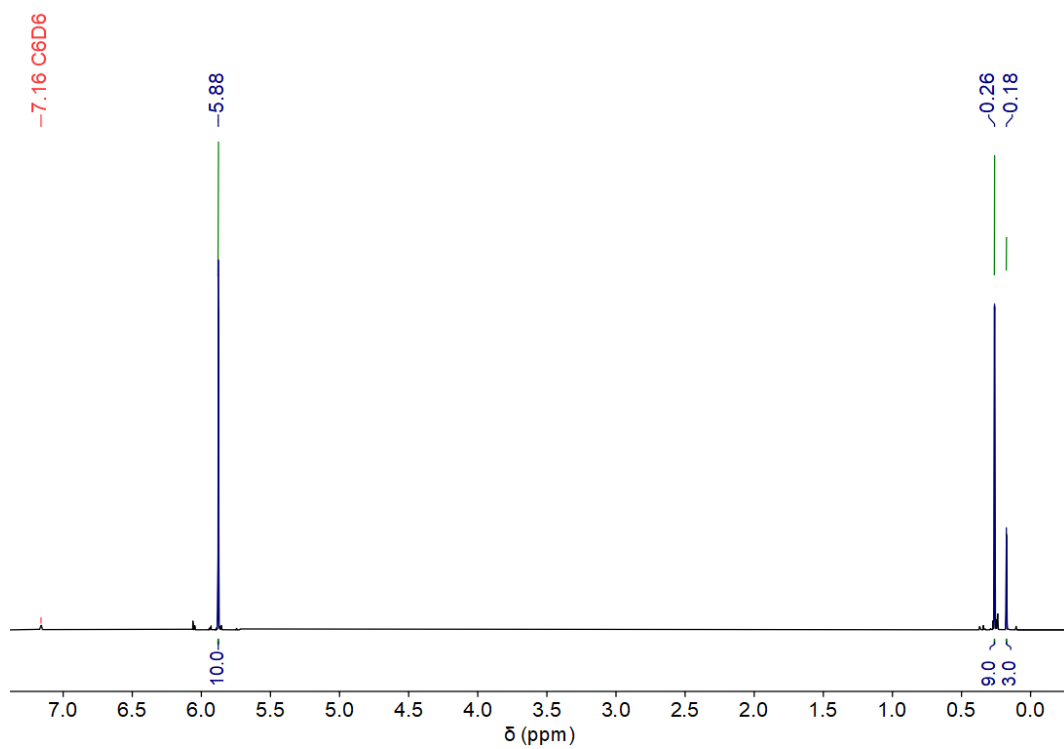

Figure S39.  $^1\text{H}$  NMR spectrum of **11** (25 °C, benzene- $d_6$ , 400.13 MHz).

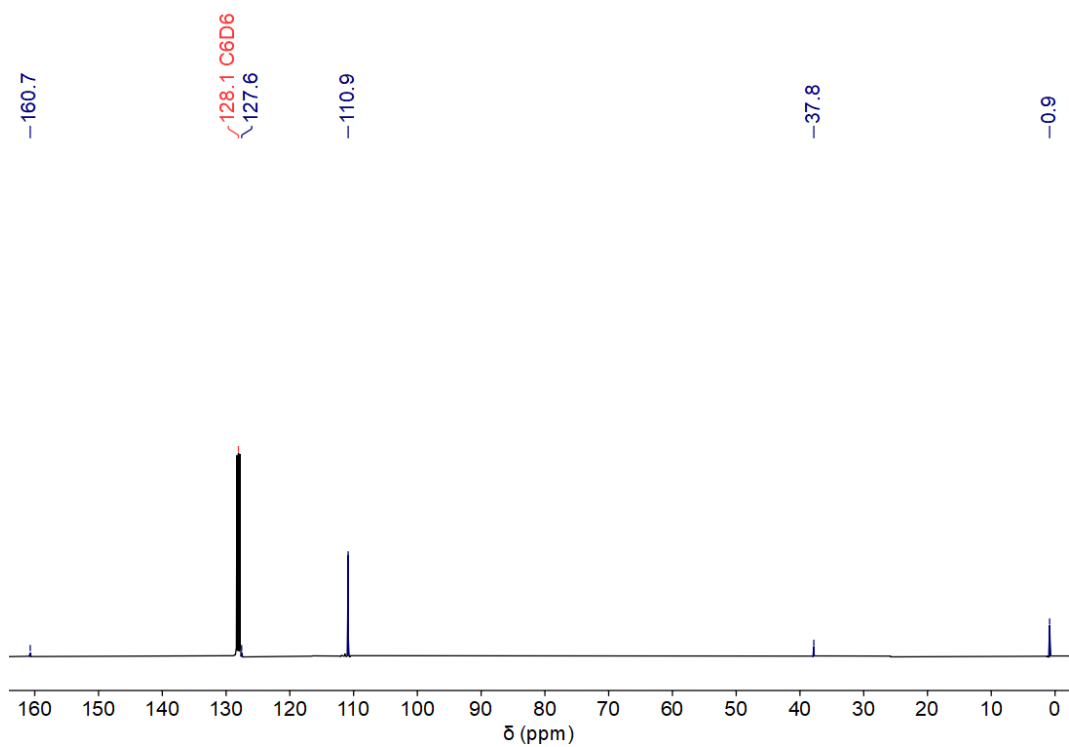

**Figure S40.**  $^{13}\text{C}$  NMR spectrum of **11** (25 °C, benzene- $d_6$ , 75.47 MHz).

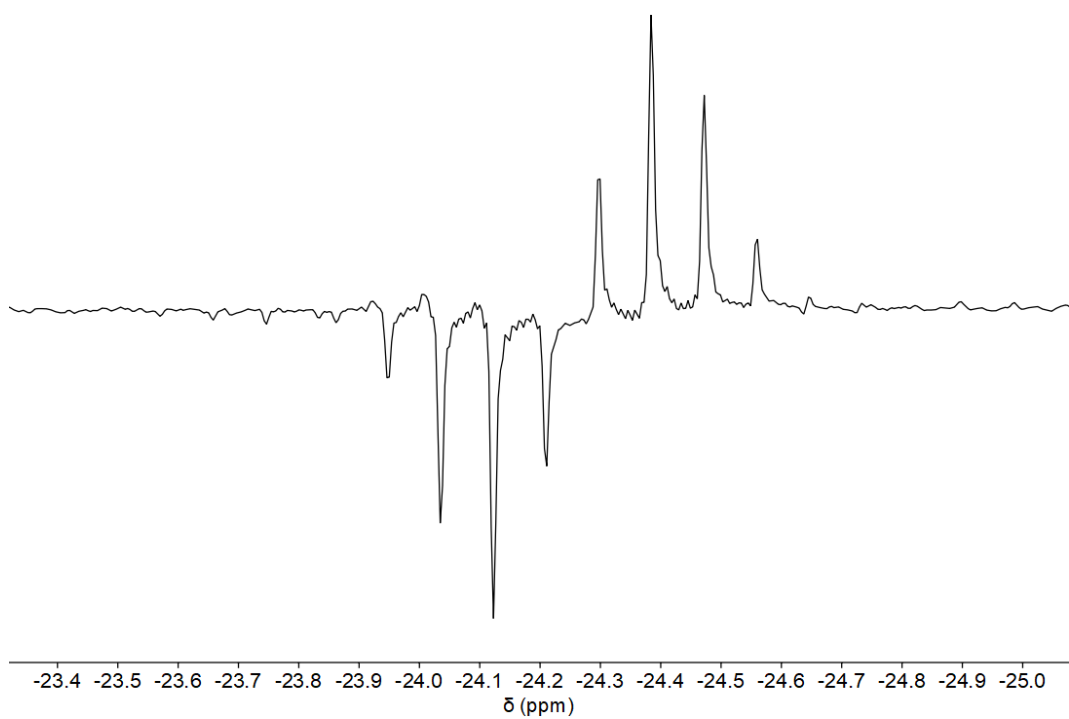

**Figure S41.**  $^{29}\text{Si}$  INEPT NMR spectrum of **11** (25 °C, benzene- $d_6$ , 59.63 MHz).

### 3.11. NMR spectra of complex $\text{BH}_2(\mu\text{-Me}_2\text{N})(\mu\text{-H})\text{BH}_2$

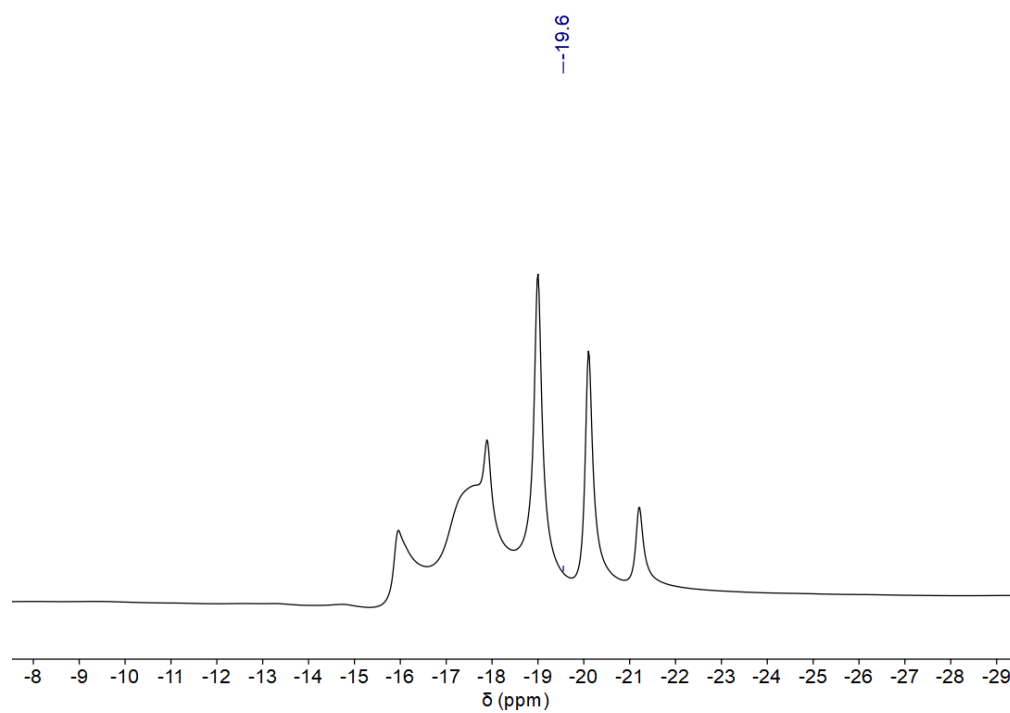

Figure S42.  $^{11}\text{B}$  NMR spectrum of  $\text{BH}_2(\mu\text{-Me}_2\text{N})(\mu\text{-H})\text{BH}_2$  (25 °C, toluene- $d_8$ , 96.32 MHz).

### 3.12. NMR spectra of the reaction mixture from dehydrocoupling of $\text{H}_3\text{B}\cdot\text{NMe}_2\text{H}$ with complex 1/MeLi

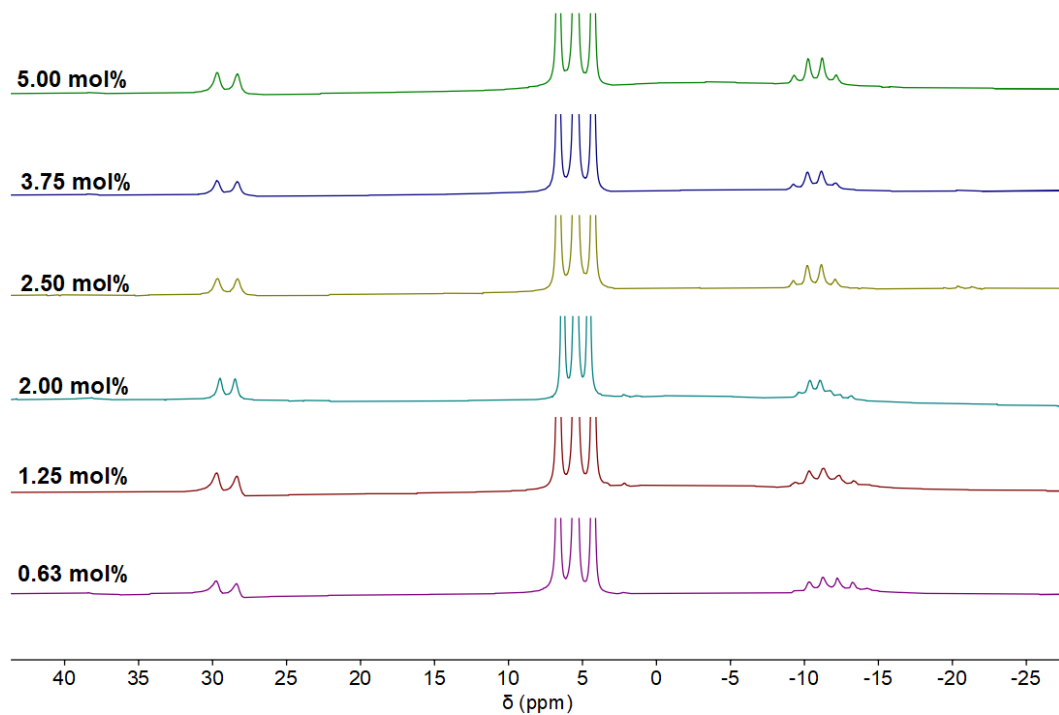

Figure S43.  $^{11}\text{B}$  NMR spectra of dehydrocoupling of  $\text{H}_3\text{B}\cdot\text{NMe}_2\text{H}$ . Conditions: room temperature, toluene, (25 °C, toluene- $d_8$ , 300.20 MHz).

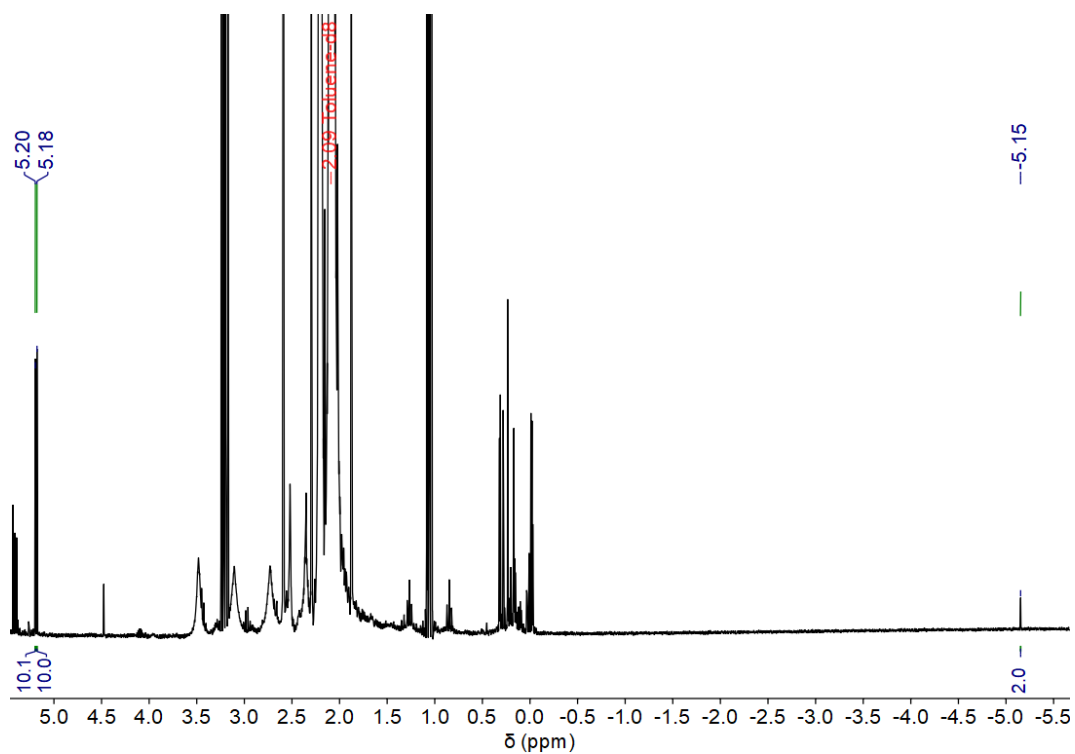

Figure S44.  $^1\text{H}$  NMR spectrum of dehydrocoupling of  $\text{H}_3\text{B}\cdot\text{NMe}_2\text{H}$ . Conditions: room temperature, toluene, 2.5 mol% 1, 5.2 mol% MeLi (25 °C, toluene- $d_8$ , 300.20 MHz).



### 3.13. NMR spectra of time-resolved dehydrocoupling experiments

All experiments were performed in an open system connected to an oil bubbler. NMR samples were taken at given times directly from Schlenk flasks containing  $V_0 = 4$  mL of the reaction solutions in toluene- $d_8$ .

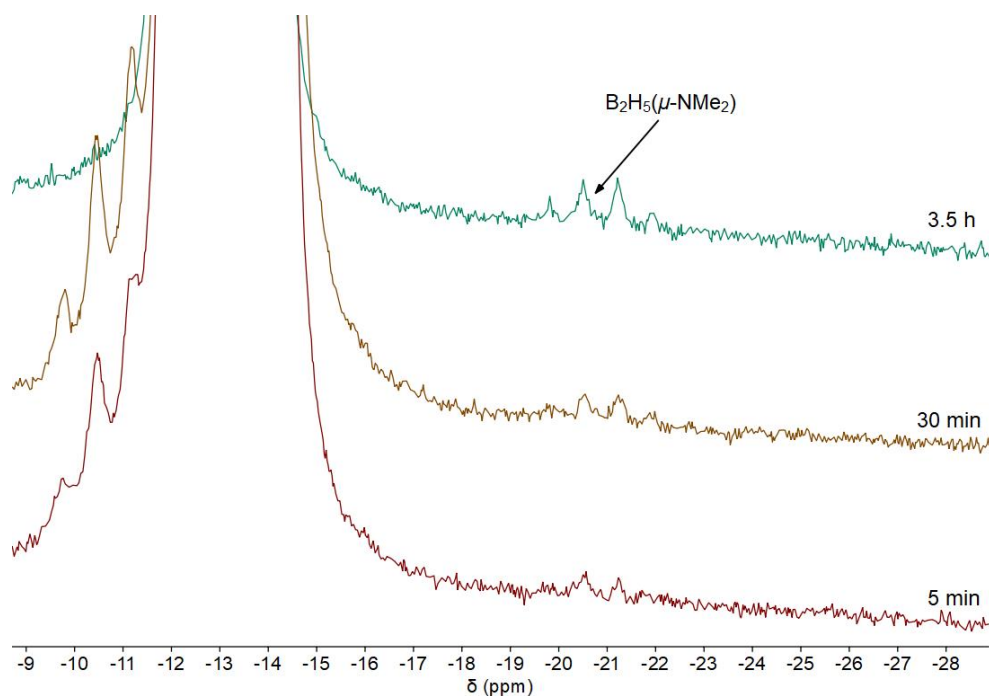

**Figure S45.** Time resolved  $^{11}\text{B}$  NMR spectra of a dehydrocoupling experiment. Conditions: room temperature, toluene, 2.5 mol% **1**, 5.2 mol% MeLi (25 °C, toluene- $d_8$ , 96.32 MHz).

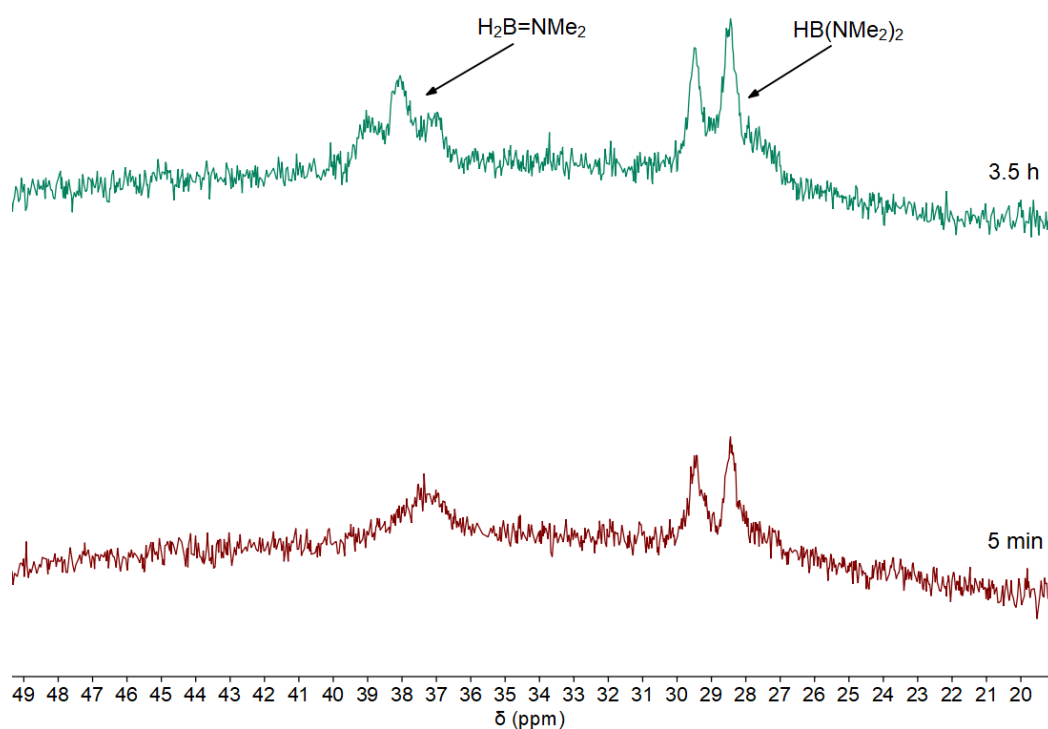

**Figure S46.** Time resolved  $^{11}\text{B}$  NMR spectra of a dehydrocoupling experiment. Conditions: room temperature, toluene, 2.5 mol% **1**, 5.2 mol% MeLi (25 °C, toluene- $d_8$ , 96.32 MHz).

### 3.14. NMR spectra of MeLi activation of complex 1

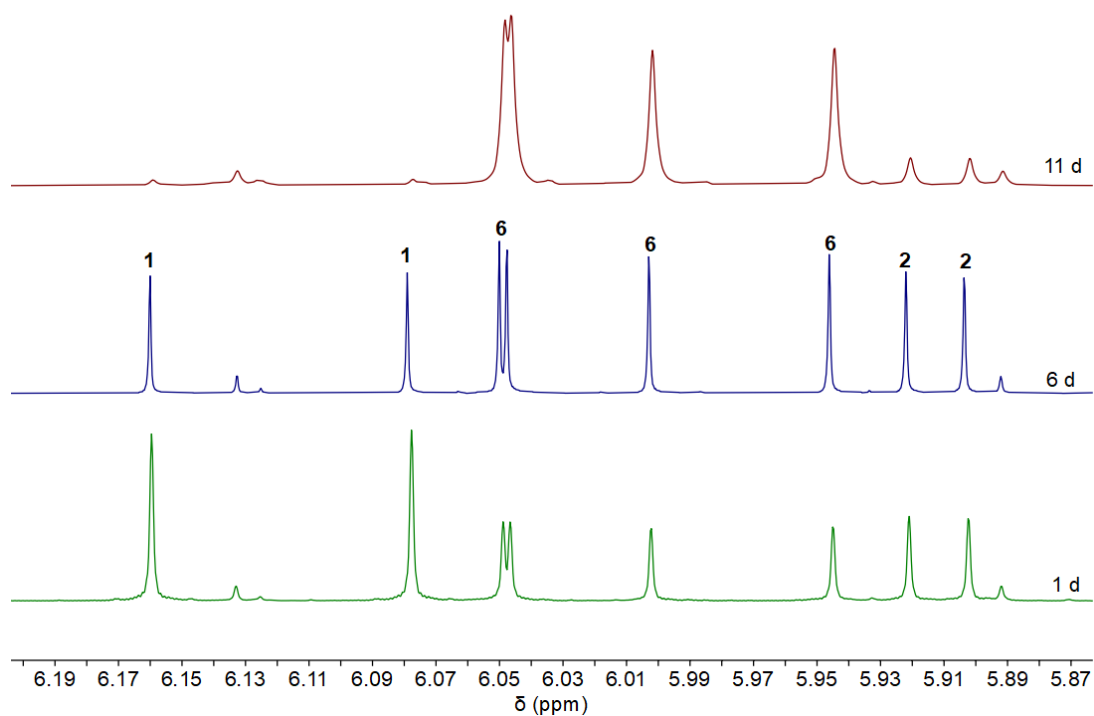

**Figure S47.** Time resolved  $^1\text{H}$  NMR spectra of the reaction of **1** with MeLi. Conditions: room temperature, benzene, 0.02 mmol **1**, 0.02 mmol MeLi (25 °C, benzene- $d_6$ , 300.20 MHz).

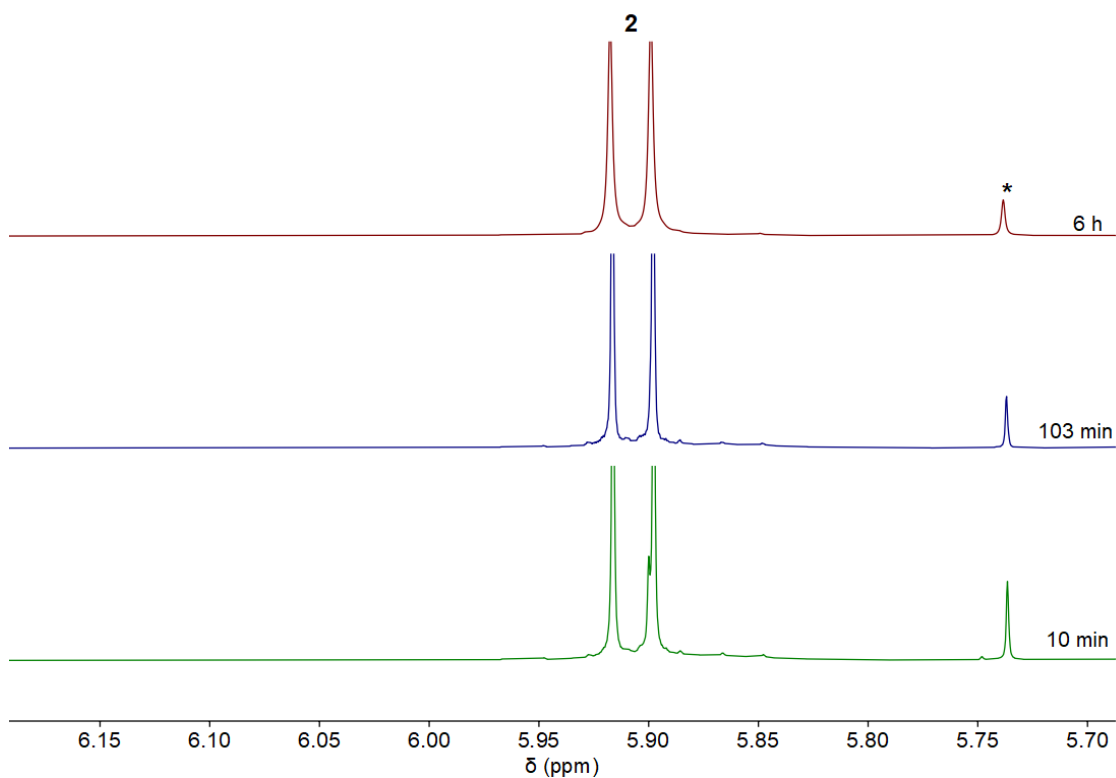

**Figure S48.** Time resolved  $^1\text{H}$  NMR spectra of the reaction of **1** with MeLi. Conditions: room temperature, benzene, 0.04 mmol **1**, 0.09 mmol MeLi (25 °C, benzene- $d_6$ , 400.13 MHz). \* corresponds to unknown species.

### 3.15. NMR spectra of catalytic dehydrocoupling of $\text{H}_3\text{B}\cdot\text{NMe}_2\text{H}$ with complex 1/MeLi and $\text{NMe}_2\text{H}$ doping

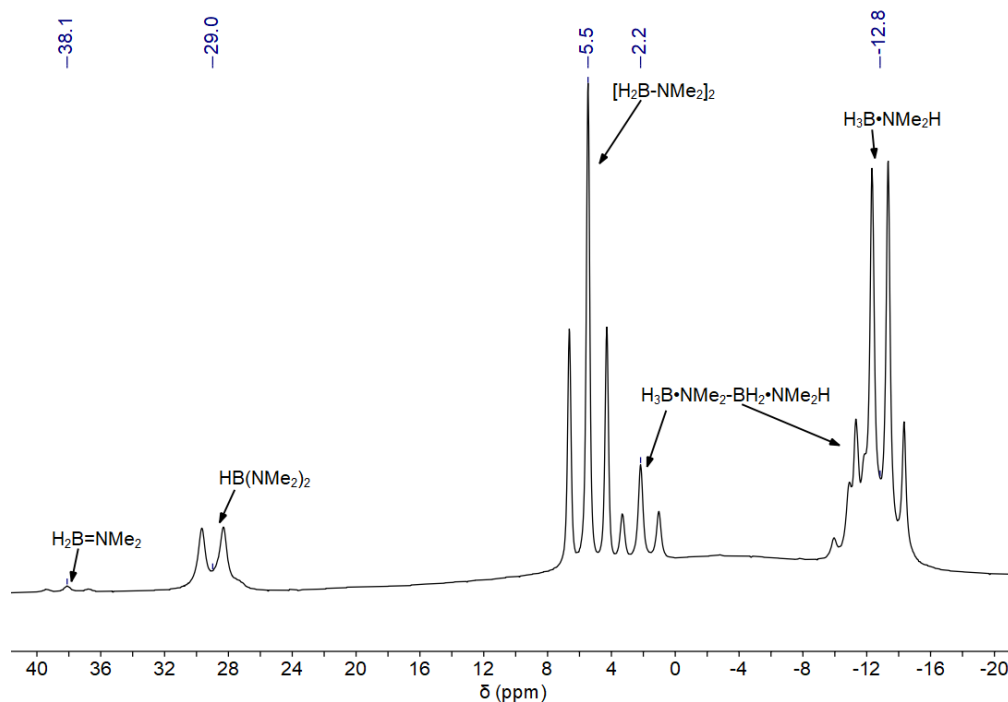

Figure S49.  $^{11}\text{B}$  NMR spectrum of dehydrocoupling of  $\text{H}_3\text{B}\cdot\text{NMe}_2\text{H}$ . Conditions: room temperature, toluene, 2.5 mol% **2**, 5.2 mol% MeLi, 5.00 mol %  $\text{NMe}_2\text{H}$  (25 °C, toluene- $d_8$ , 96.32 MHz).

### 3.16. NMR spectra of catalytic dehydrocoupling of $\text{H}_3\text{B}\cdot\text{NMe}_2\text{H}$ with complex 1/MeLi and $\text{BH}_3\cdot\text{THF}$ doping

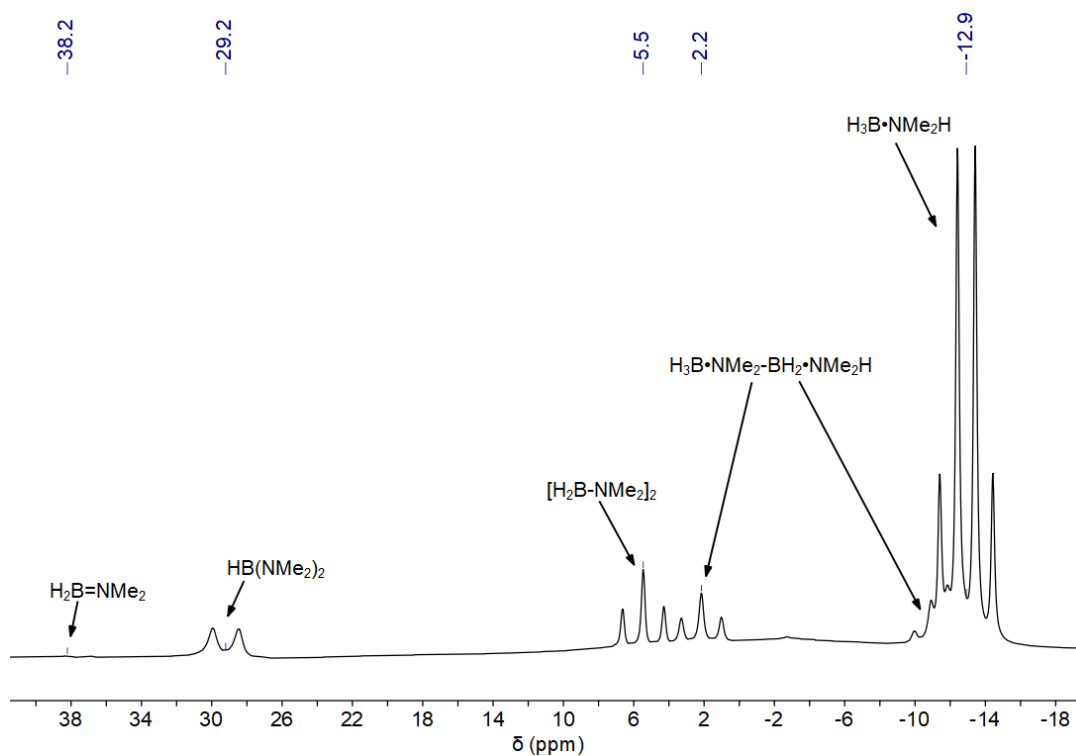

Figure S50.  $^{11}\text{B}$  NMR spectrum of dehydrocoupling of  $\text{H}_3\text{B}\cdot\text{NMe}_2\text{H}$ . Conditions: room temperature, toluene, 2.5 mol% **2**, 5.2 mol% MeLi, 5.00 mol %  $\text{BH}_3\cdot\text{THF}$  (25 °C, toluene- $d_8$ , 96.32 MHz).

### 3.17. NMR spectra of catalytic dehydrocoupling of $\text{H}_3\text{B}\cdot\text{NMe}_2\text{H}$ with complex 2

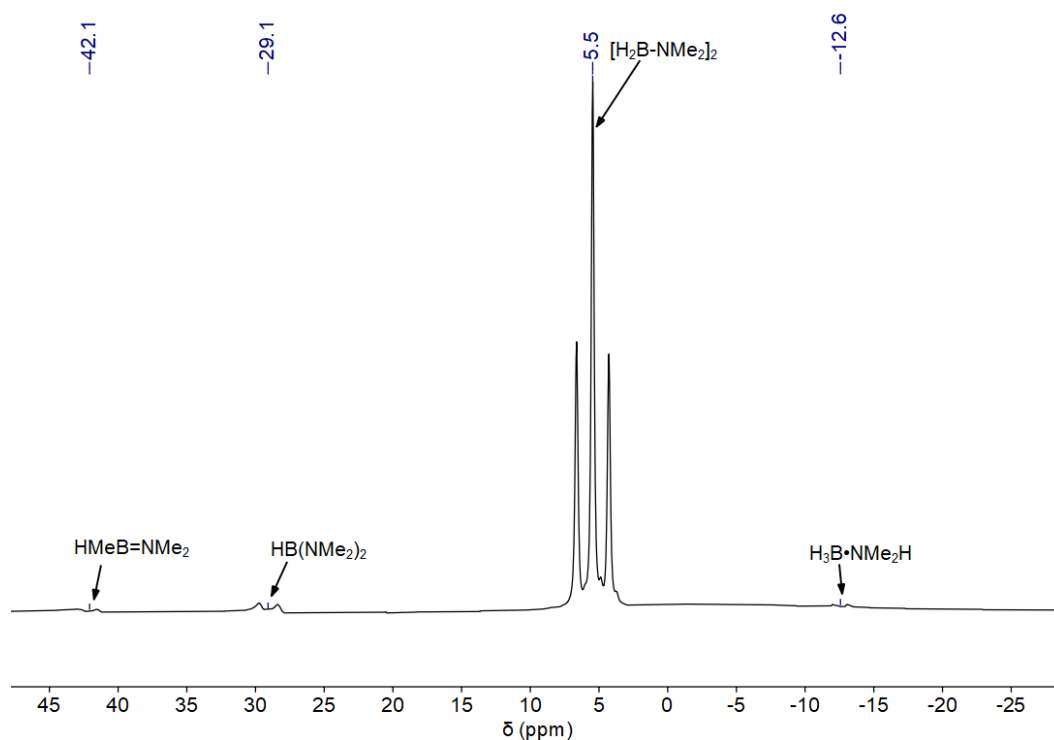

Figure S51.  $^{11}\text{B}$  NMR spectrum of dehydrocoupling of  $\text{H}_3\text{B}\cdot\text{NMe}_2\text{H}$ . Conditions: room temperature, toluene, 2.5 mol% **2**, 5.2 mol% MeLi (25 °C, toluene- $d_8$ , 96.32 MHz).

### 3.18. NMR spectra of catalytic dehydrocoupling of $\text{H}_3\text{B}\cdot\text{NMe}_2\text{H}$ with complex 4

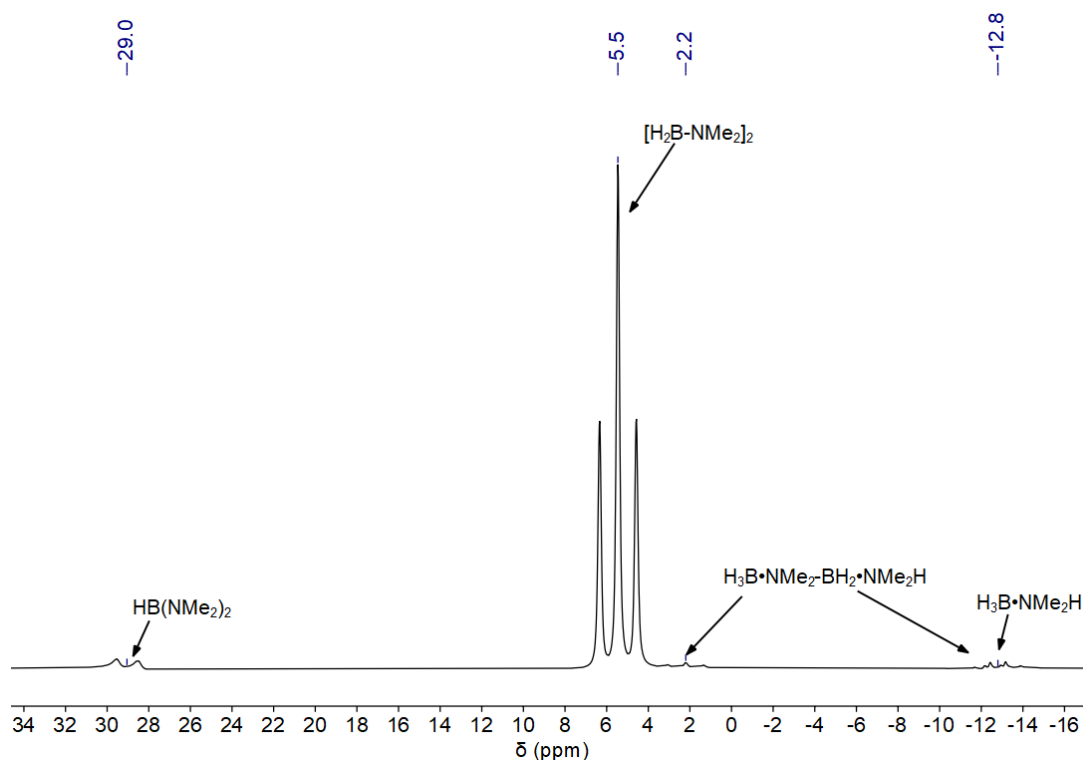

Figure S52.  $^{11}\text{B}$  NMR spectrum of dehydrocoupling of  $\text{H}_3\text{B}\cdot\text{NMe}_2\text{H}$ . Conditions: room temperature, toluene, 2.5 mol% **4** (25 °C, toluene- $d_8$ , 96.32 MHz).

### 3.19. NMR spectra of catalytic dehydrocoupling of $\text{H}_3\text{B}\cdot\text{NMe}_2\text{H}$ with complex 5

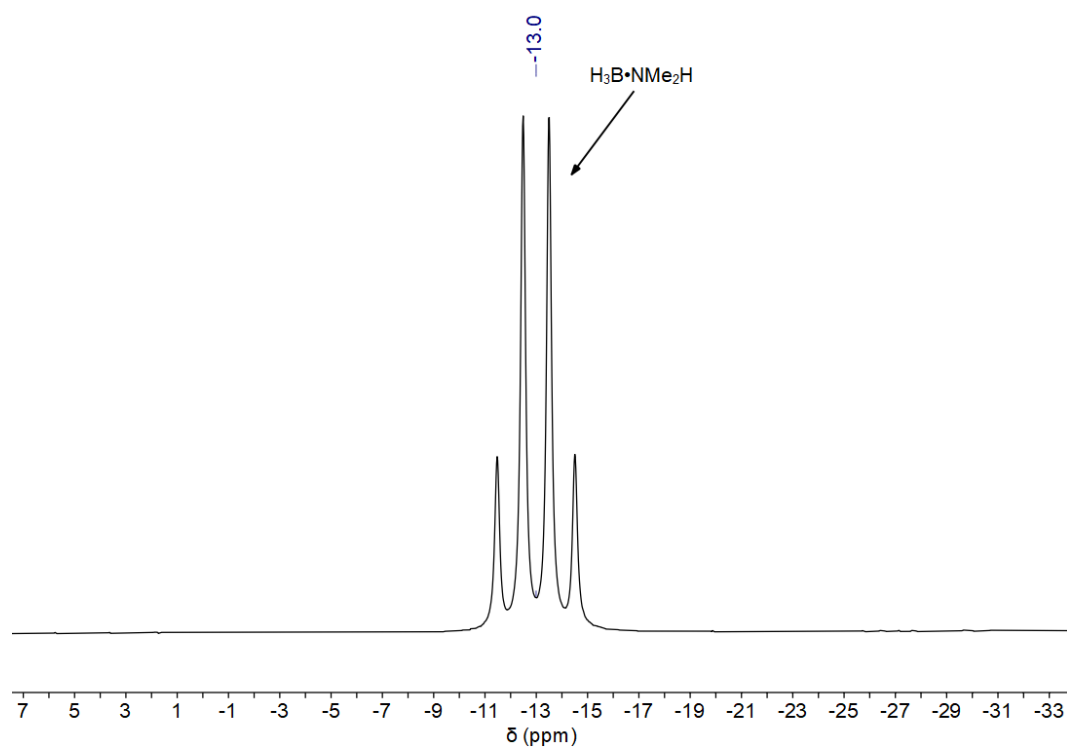

**Figure S53.**  $^{11}\text{B}$  NMR spectrum of dehydrocoupling of  $\text{H}_3\text{B}\cdot\text{NMe}_2\text{H}$ . Conditions: room temperature, toluene, 2.5 mol% **5** (25 °C, toluene- $d_8$ , 96.32 MHz).

### 3.20. NMR spectra of catalytic dehydrocoupling of $\text{H}_3\text{B}\cdot\text{NMe}_2\text{H}$ with complex 7

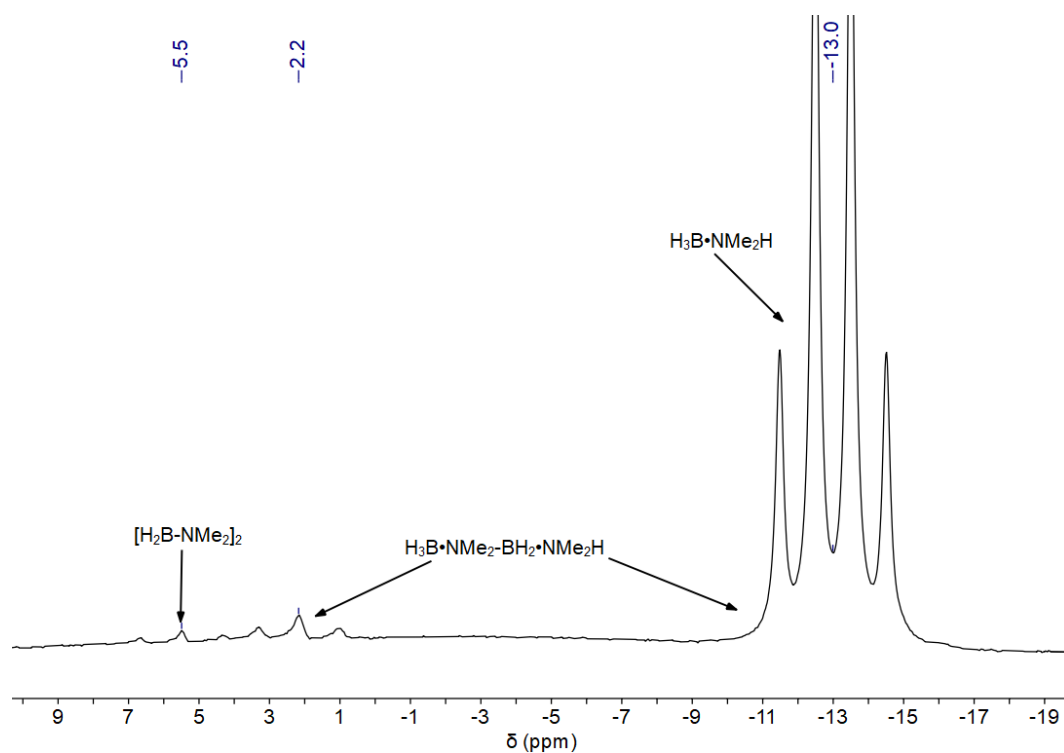

**Figure S54.**  $^{11}\text{B}$  NMR spectrum of dehydrocoupling of  $\text{H}_3\text{B}\cdot\text{NMe}_2\text{H}$ . Conditions: room temperature, toluene, 2.5 mol% **7** (25 °C, toluene- $d_8$ , 96.32 MHz).

### 3.21. NMR spectra of catalytic dehydrocoupling of $\text{H}_3\text{B}\cdot\text{NMe}_2\text{H}$ with complex **9**

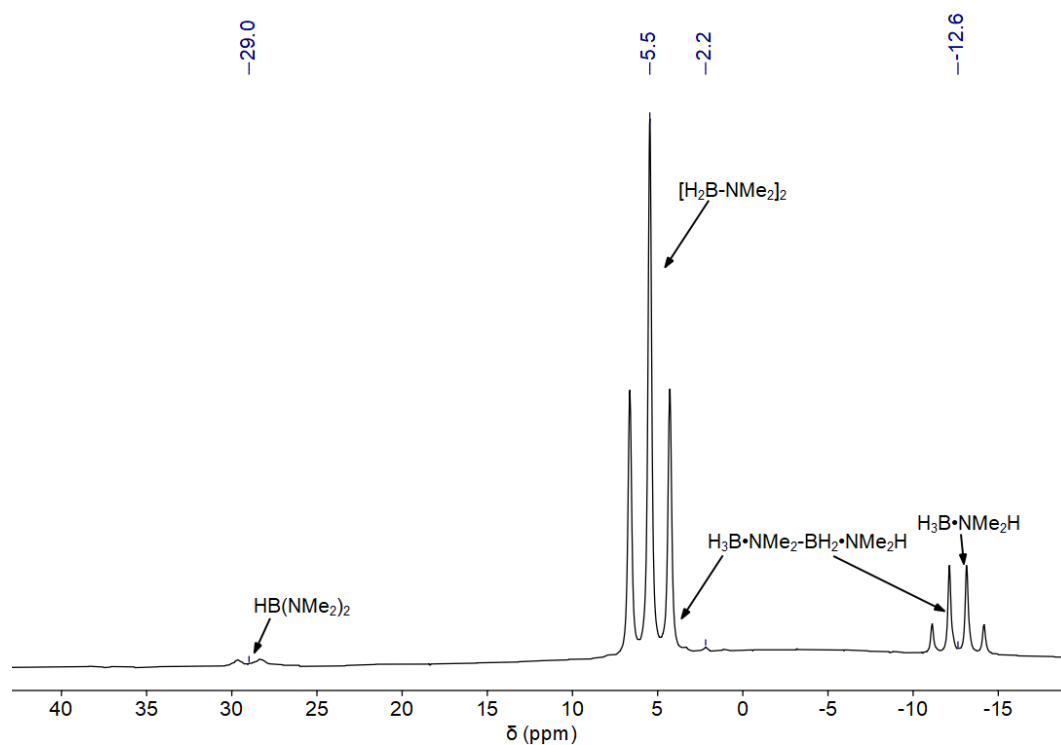

**Figure S55.**  $^{11}\text{B}$  NMR spectrum of dehydrocoupling of  $\text{H}_3\text{B}\cdot\text{NMe}_2\text{H}$ . Conditions: room temperature, toluene, 2.5 mol% **9** (25 °C, toluene- $d_8$ , 96.32 MHz).

### 3.22. NMR spectra of catalytic dehydrocoupling of $\text{H}_3\text{B}\cdot\text{NMe}_2\text{H}$ with complex **10**

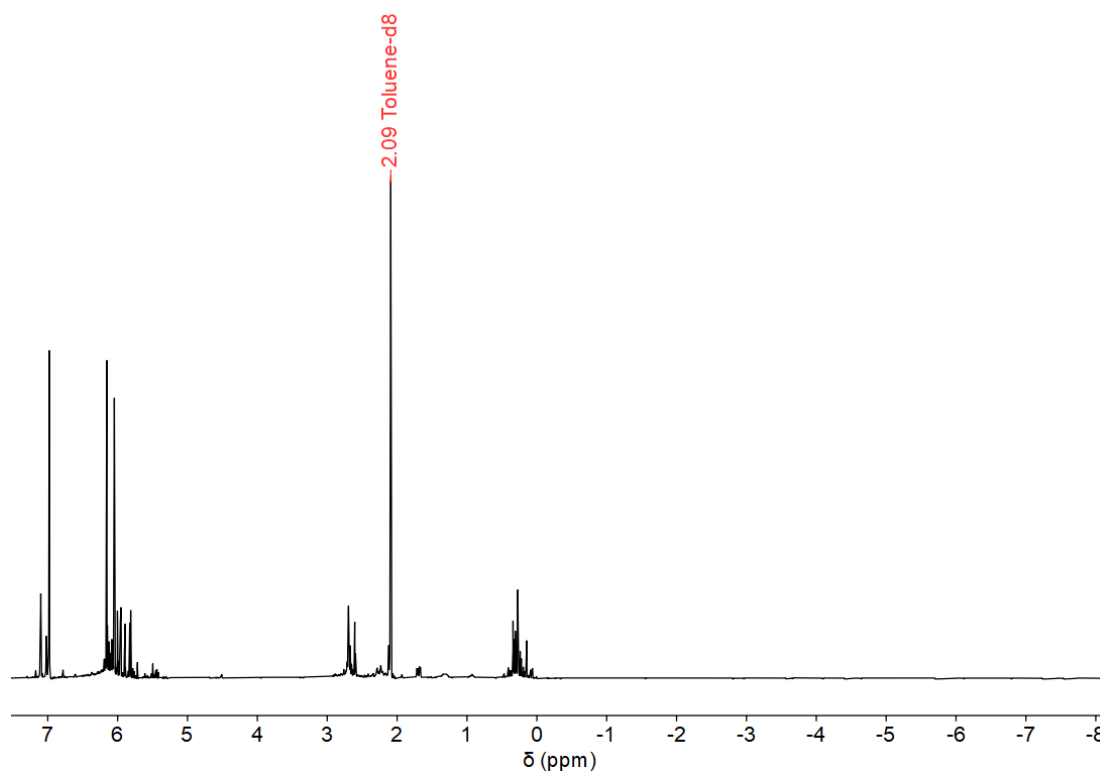

**Figure S56.**  $^1\text{H}$  NMR spectra of dehydrocoupling of  $\text{H}_3\text{B}\cdot\text{NMe}_2\text{H}$ . Conditions: room temperature, toluene, 2.5 mol% **10** (25 °C, toluene- $d_8$ , 400.13 MHz).

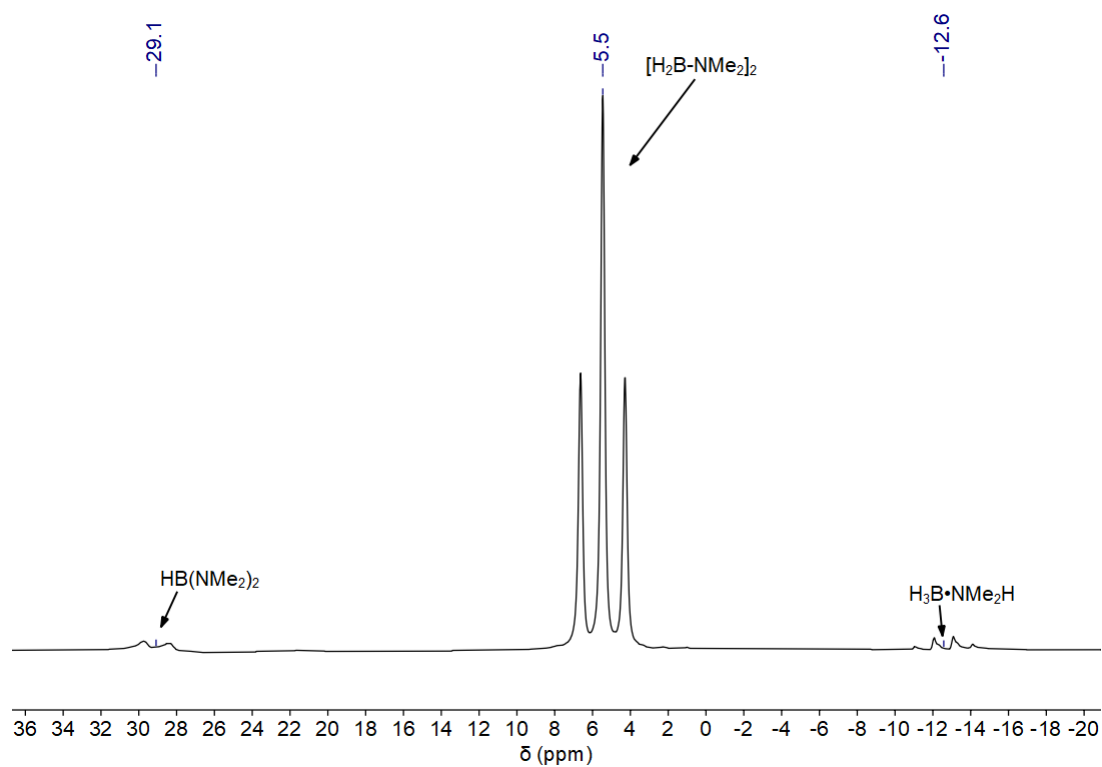

**Figure S57.**  $^{11}\text{B}$  NMR spectrum of dehydrocoupling of  $\text{H}_3\text{B}\cdot\text{NMe}_2\text{H}$ . Conditions: room temperature, toluene, 2.5 mol% **10** (25 °C, toluene- $d_8$ , 96.32 MHz).

### 3.23. NMR spectra of catalytic dehydrocoupling of deuterated amine boranes

#### 3.23.1. NMR spectra after dehydrocoupling of $\text{H}_3\text{B}\cdot\text{NMe}_2\text{D}$

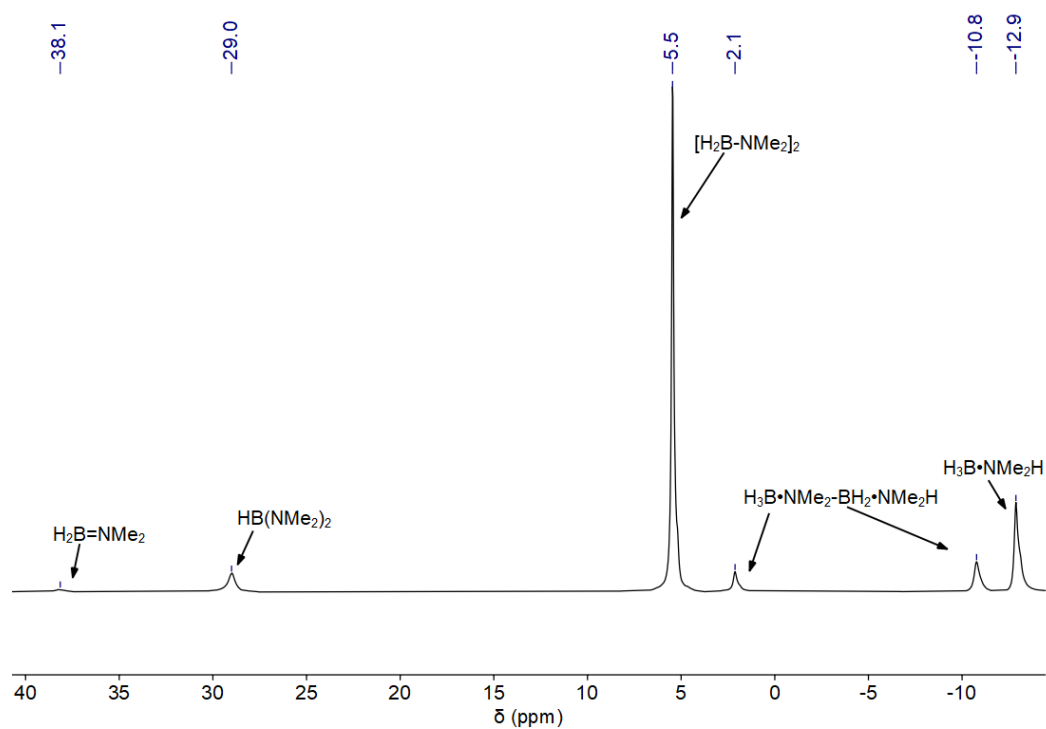

**Figure S58.**  $^{11}\text{B}\{^1\text{H}\}$  spectrum of dehydrocoupling of  $\text{H}_3\text{B}\cdot\text{NMe}_2\text{D}$ . Conditions: room temperature, toluene, 2.5 mol% **1**, 5.2 mol% MeLi (25 °C, toluene- $d_8$ , 96.32 MHz).

### 3.23.2. NMR spectra after dehydrocoupling of $D_3B \cdot NMe_2H$

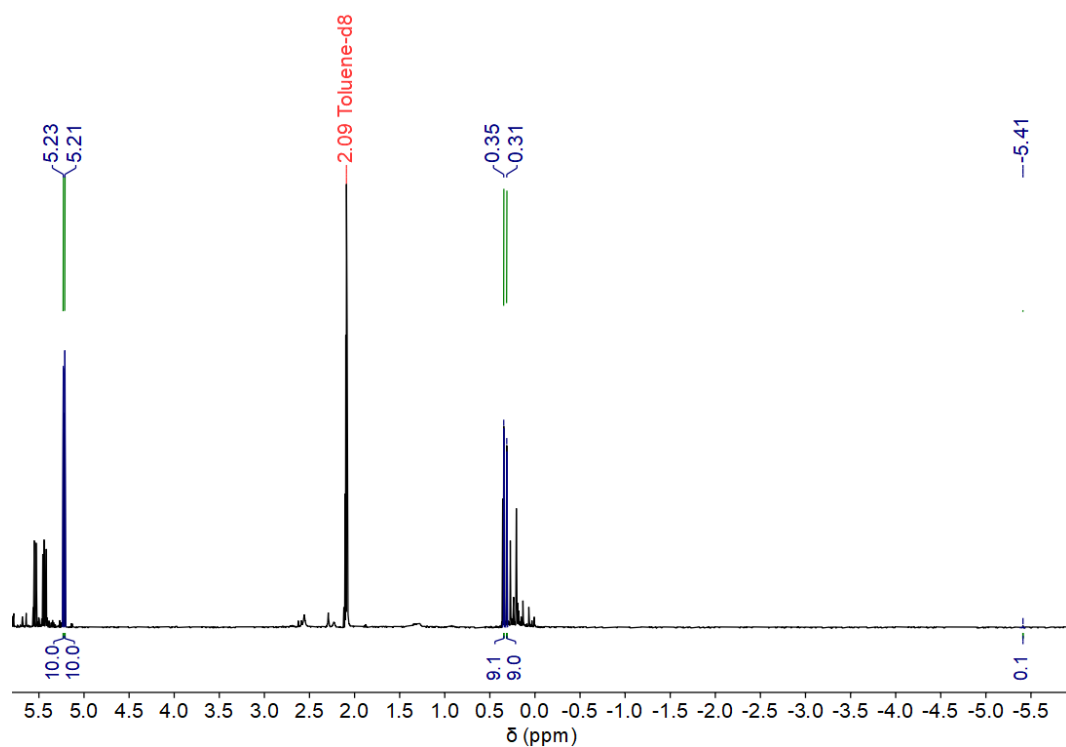

**Figure S59.**  $^1H$  NMR spectrum of dehydrocoupling of  $D_3B \cdot NMe_2H$ . Conditions: room temperature, toluene, 2.5 mol% **1**, 5.2 mol% MeLi. The  $CH_2$  resonance of protonated **7** at -5.41 ppm is absent, indicating the presence of a  $CD_2$  group by exclusive transfer of B-D to the Zr complex **7** (25 °C, toluene- $d_8$ , 300.20 MHz).

### 3.23.3. NMR spectra after dehydrocoupling of $D_3B \cdot NMe_2D$

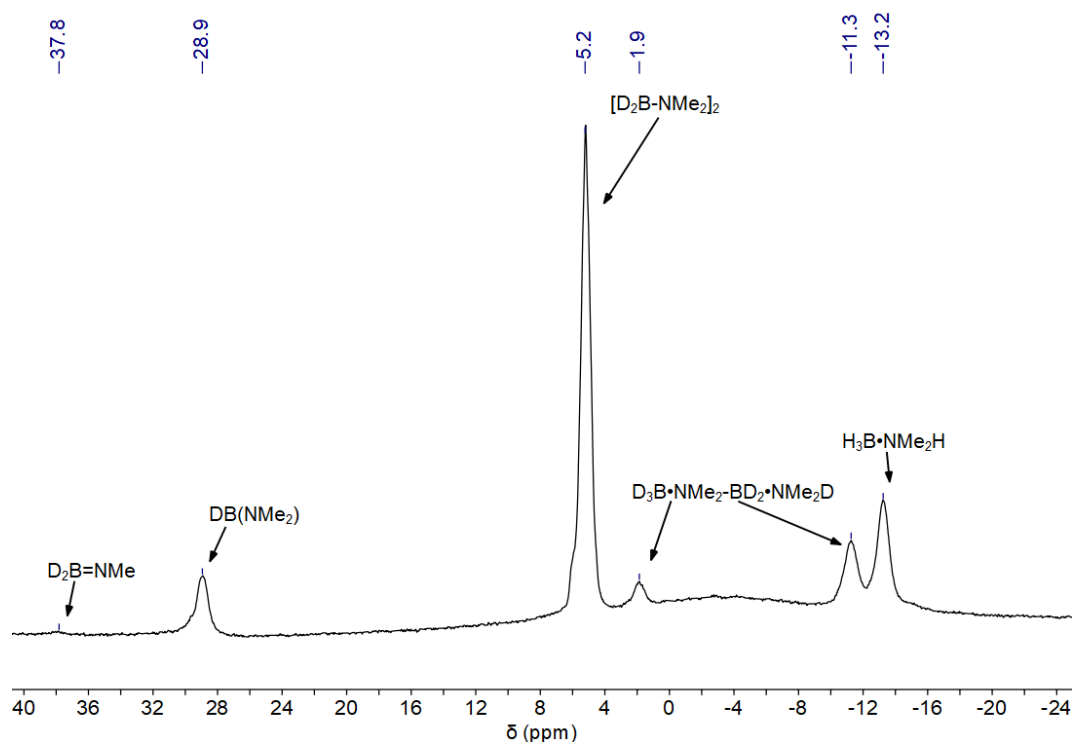

**Figure S60.**  $^{11}B$  spectrum of dehydrocoupling of  $D_3B \cdot NMe_2D$ . Conditions: room temperature, toluene, 2.5 mol% **1**, 5.2 mol% MeLi (25 °C, toluene- $d_8$ , 96.32 MHz).



### 3.24. NMR spectra of dehydrocoupling of $\text{H}_3\text{B}\cdot\text{NMe}_2\text{H}$ , activation with $\text{Li}[\text{NMe}_2\cdot\text{BH}_3]$

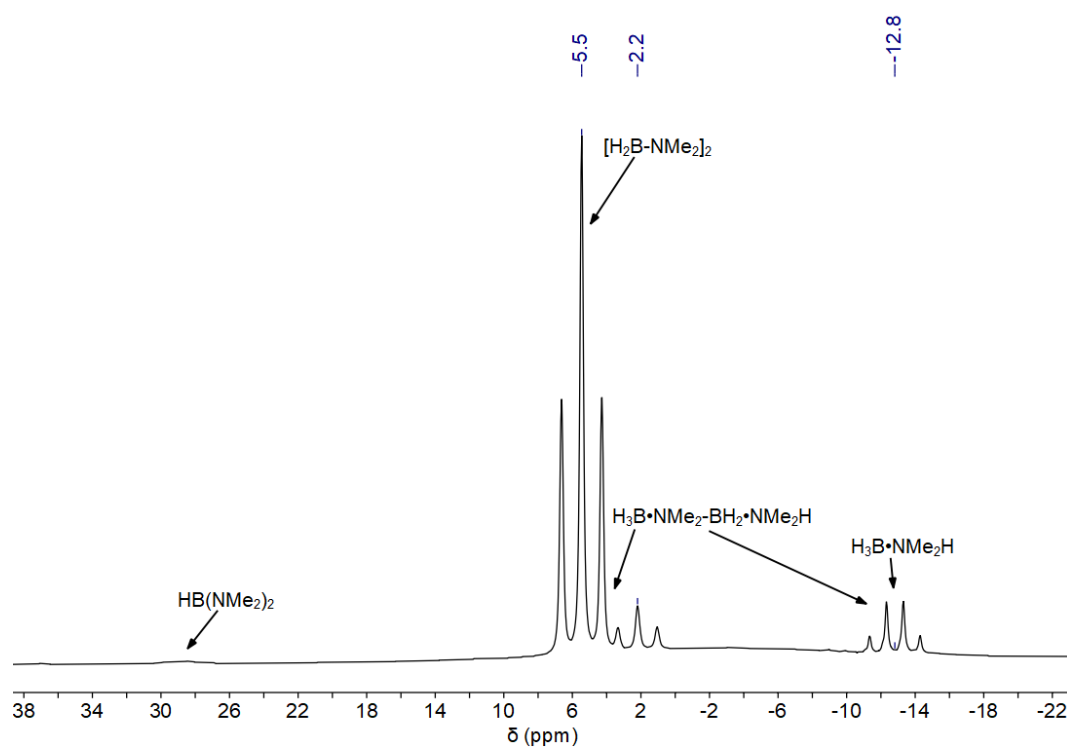

**Figure S61.**  $^{11}\text{B}$  NMR spectrum of catalytic dehydrocoupling of  $\text{H}_3\text{B}\cdot\text{NMe}_2\text{H}$ . Conditions: room temperature, toluene, 2.5 mol% **1**, 5.0 mol%  $\text{Li}[\text{NMe}_2\cdot\text{BH}_3]$  (25 °C, toluene- $d_8$ , 96.32 MHz).

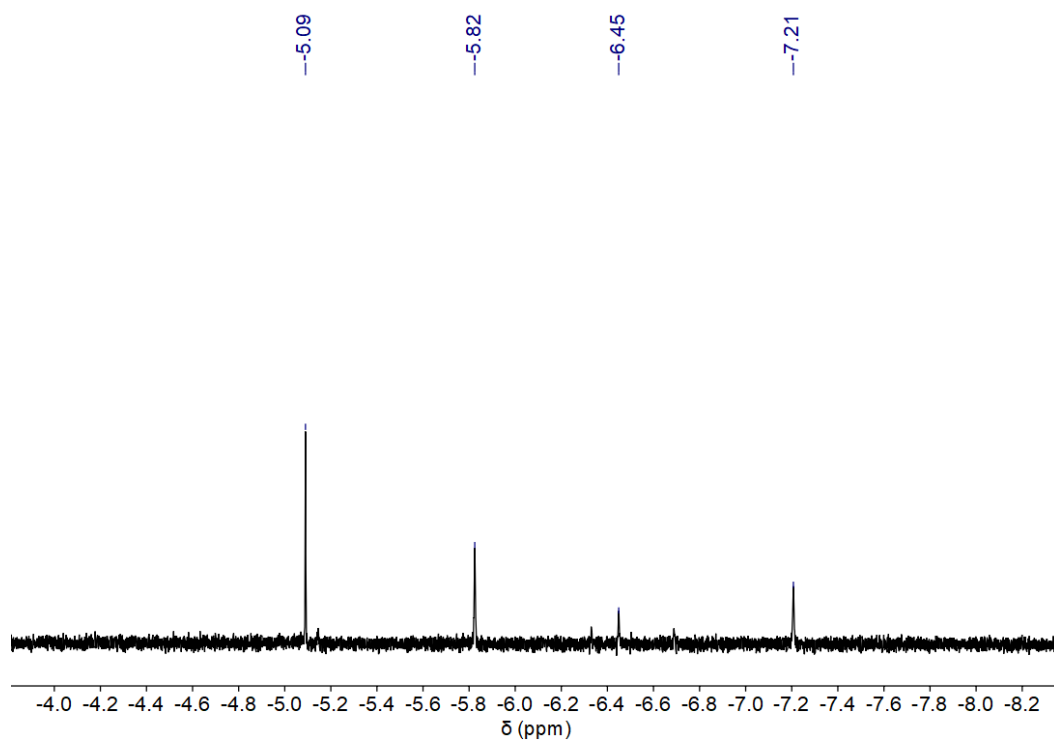

**Figure S62.**  $^1\text{H}$  NMR spectrum of the high field region of a stoichiometric reaction of **1** with  $\text{Li}[\text{NMe}_2\cdot\text{BH}_3]$ . Conditions: room temperature, benzene, 0.07 mmol **1**, 0.14 mmol  $\text{Li}[\text{NMe}_2\cdot\text{BH}_3]$  (25 °C, benzene- $d_6$ , 300.13 MHz).

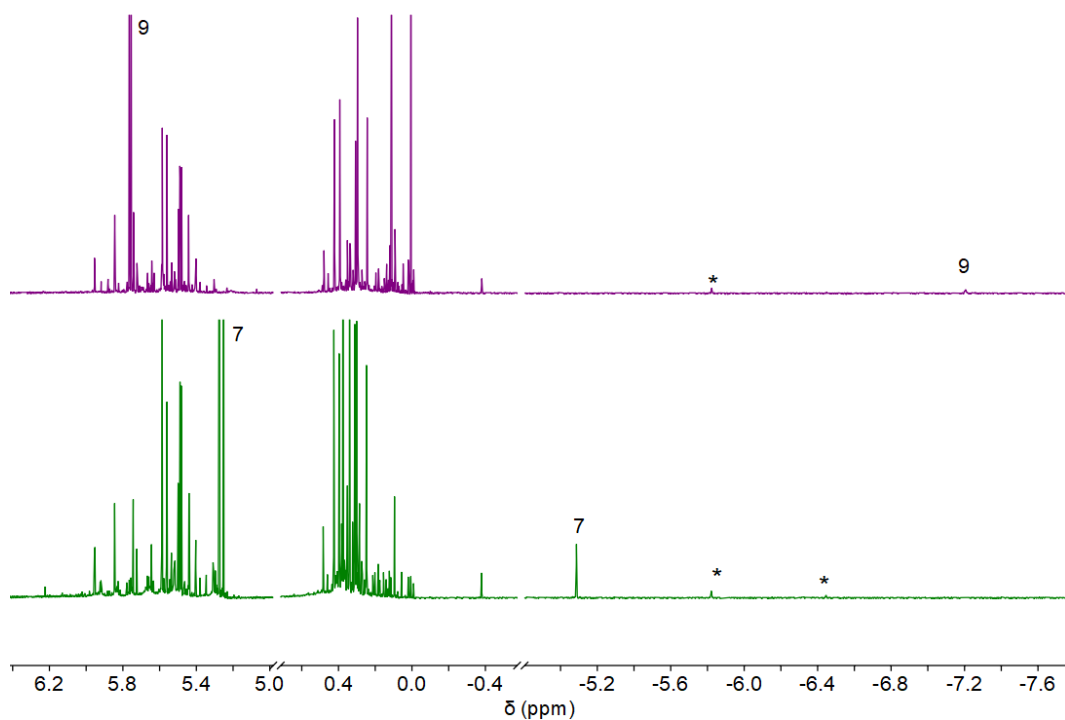

**Figure S63.**  $^1\text{H}$  NMR spectra of stoichiometric reaction of  $\text{H}_3\text{B}\cdot\text{NMe}_2\text{H}$  with **1**. Conditions: room temperature, benzene, 1.33 mmol  $\text{H}_3\text{B}\cdot\text{NMe}_2\text{H}$  (green: 0.07 mmol **1**, 0.14 mmol  $\text{Li}[\text{NMe}_2\cdot\text{BH}_3]$  with vacuo, purple: 0.07 mmol **1**, 0.14 mmol  $\text{Li}[\text{NMe}_2\cdot\text{BH}_3]$  without vacuo) (25 °C, benzene- $d_6$ , 300.20 MHz). \* corresponds to unknown species.

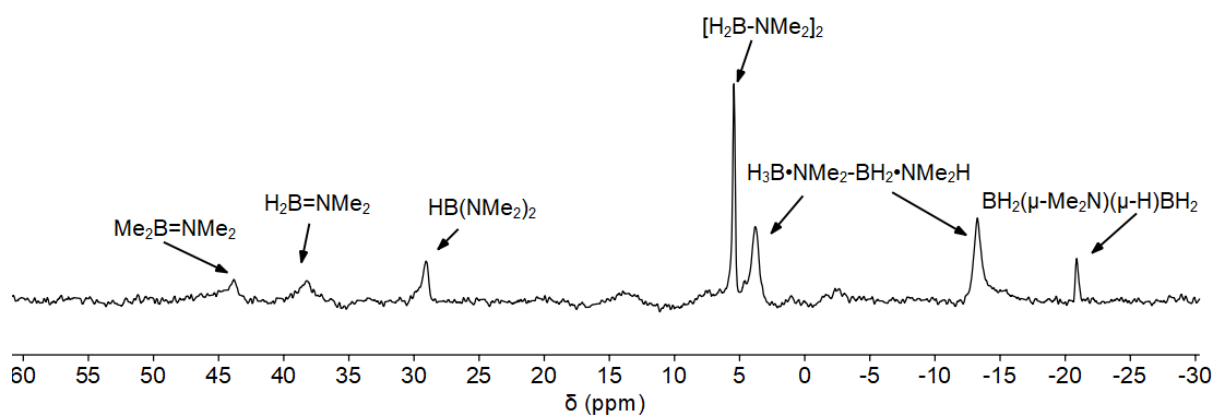

**Figure S64.**  $^{11}\text{B}$  NMR spectrum stoichiometric reaction of  $\text{H}_3\text{B}\cdot\text{NMe}_2\text{H}$  with **1**. Conditions: room temperature, toluene, 0.07 mmol **1**, 0.14 mmol  $\text{Li}[\text{NMe}_2\cdot\text{BH}_3]$  (25 °C, benzene- $d_6$ , 96.32 MHz).

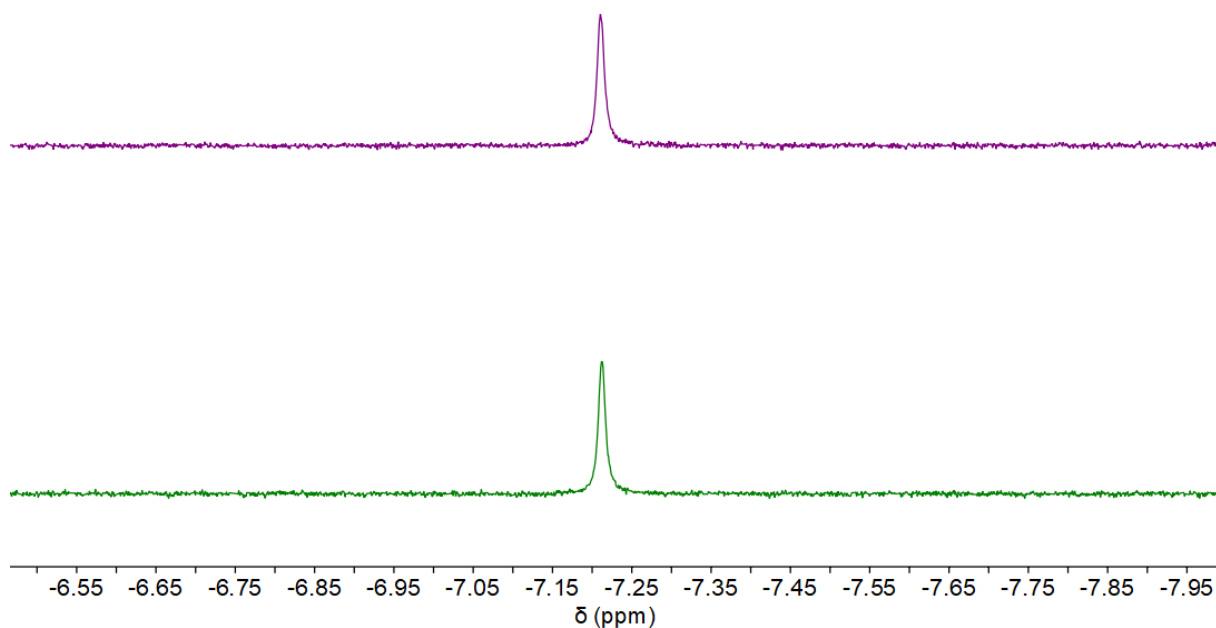

**Figure S65.** Comparison of  $^1\text{H}\{^{11}\text{B}\}$  (purple) and  $^1\text{H}$  NMR spectra (green) of stoichiometric reaction of  $\text{H}_3\text{B}\cdot\text{NMe}_2\text{H}$  with **1**. Conditions: room temperature, toluene, 0.07 mmol **1**, 0.56 mmol  $\text{Li}[\text{NMe}_2\text{BH}_3]$  (25 °C, benzene- $d_6$ , 300.20 MHz).

### 3.25. NMR spectra of stoichiometric experiments

#### 3.25.1. Comparison of the stoichiometric reaction of **4** with $\text{BH}_3\cdot\text{THF}$

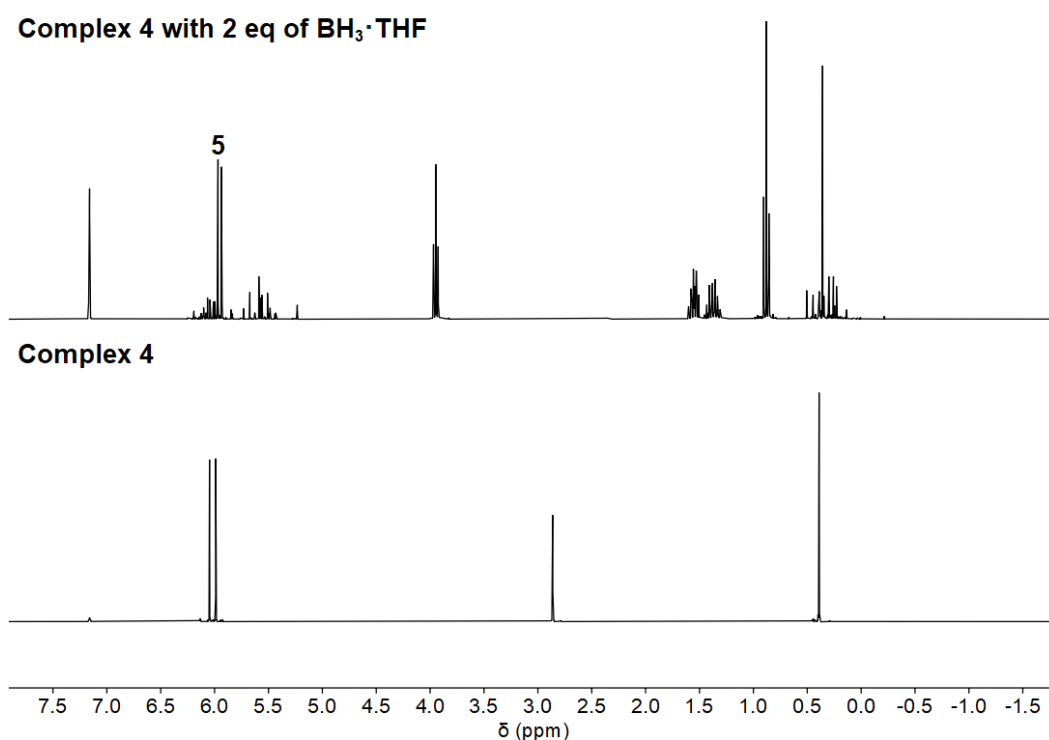

**Figure S66.**  $^1\text{H}$  NMR spectrum of stoichiometric reaction of **4** with  $\text{BH}_3\cdot\text{THF}$  (25 °C, benzene- $d_6$ , 300.13 MHz).

### 3.25.2. NMR spectrum of the stoichiometric reaction of $\text{H}_3\text{B}\cdot\text{NMe}_2$ with **1**/MeLi

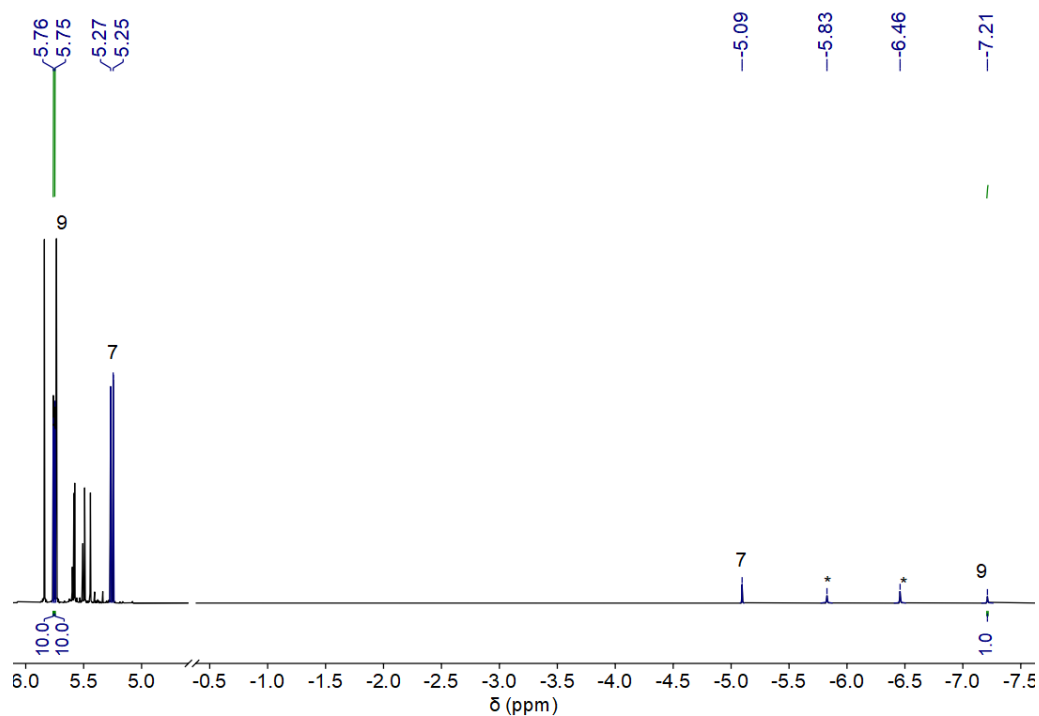

**Figure S67.**  $^1\text{H}$  NMR spectrum of stoichiometric reaction of  $\text{H}_3\text{B}\cdot\text{NMe}_2$  with **1**/MeLi. Conditions: room temperature, benzene, 0.02 mmol **1**, 0.05 mmol MeLi (25 °C, benzene- $d_6$ , 300.20 MHz). The region between 0.5 and 5.0 ppm which shows the products of dehydrocoupling of  $\text{H}_3\text{B}\cdot\text{NMe}_2$  has been omitted. \* corresponds to unknown species.

### 3.25.3. NMR spectrum of the stoichiometric reaction of $\text{H}_3\text{B}\cdot\text{NMe}_2\text{H}$ with **1**/MeLi

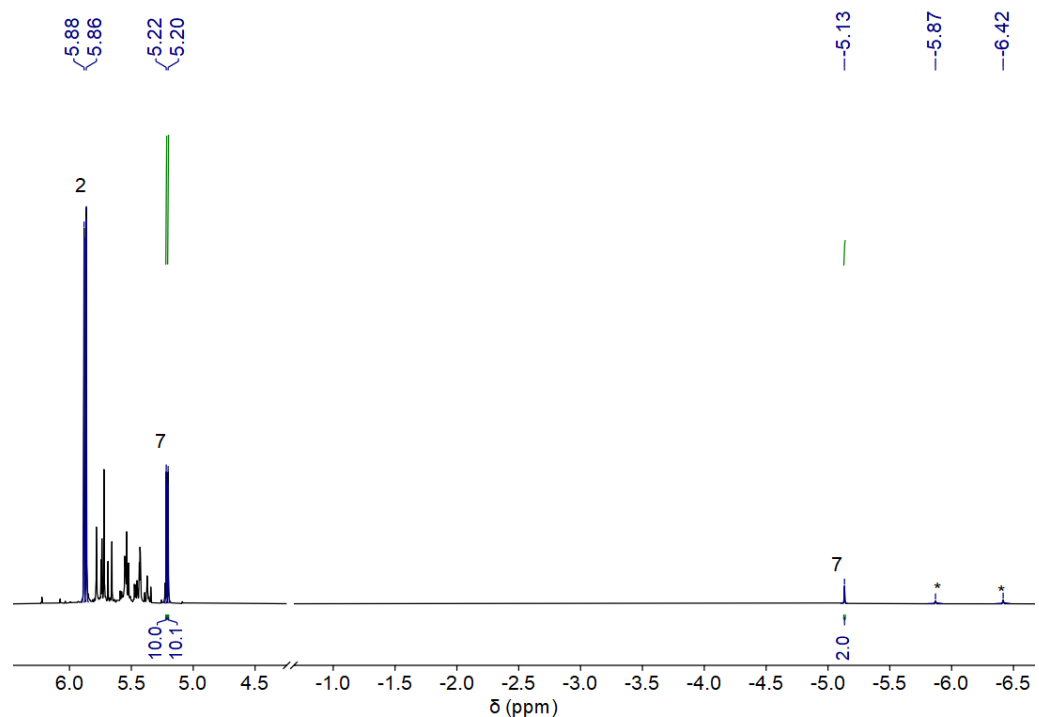

**Figure S68.**  $^1\text{H}$  NMR spectrum of stoichiometric reaction of  $\text{H}_3\text{B}\cdot\text{NMe}_2\text{H}$  with **1**/MeLi. Conditions: room temperature, toluene, 0.04 mmol **1**, 0.07 mmol MeLi (25 °C, toluene- $d_8$ , 300.20 MHz). The region between -1.0 and 4.5 ppm which shows the products of dehydrocoupling of  $\text{H}_3\text{B}\cdot\text{NMe}_2$  has been omitted.

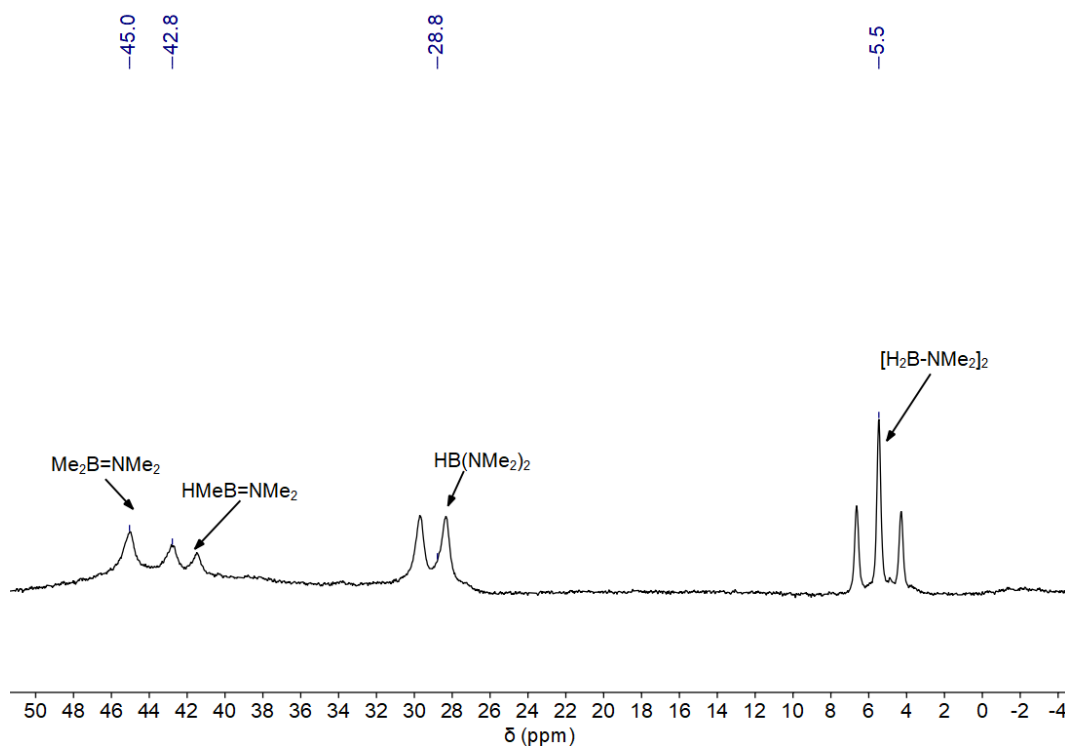

**Figure S69.**  $^{11}\text{B}$  NMR spectrum of stoichiometric reaction of  $\text{H}_3\text{B}\cdot\text{NMe}_2\text{H}$  with **1**/MeLi. Conditions: room temperature, toluene, 0.04 mmol **1**, 0.07 mmol MeLi. (25 °C, toluene- $d_8$ , 96.32 MHz).

### 3.25.4. NMR spectrum of stoichiometric reaction of $\text{D}_3\text{B}\cdot\text{NMe}_2\text{H}$ with **1**/MeLi

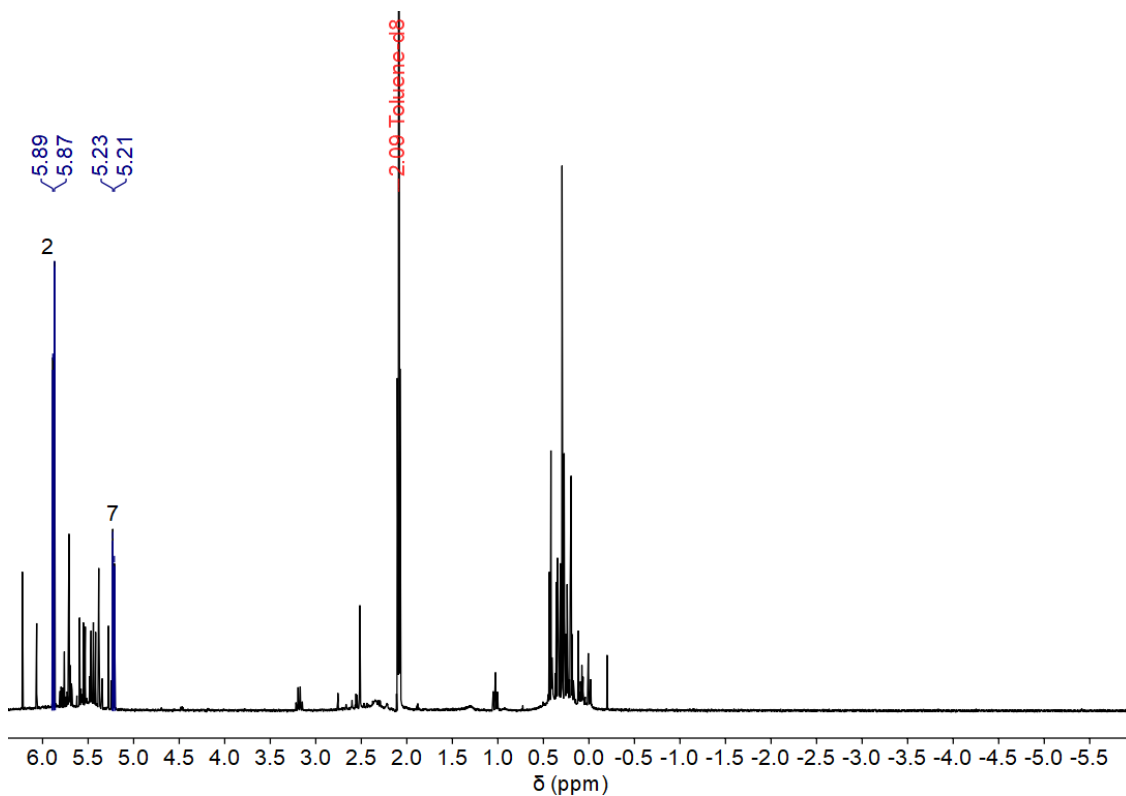

**Figure S70.**  $^1\text{H}$  NMR spectrum of stoichiometric reaction of  $\text{D}_3\text{B}\cdot\text{NMe}_2\text{H}$  with **1**/MeLi. Conditions: room temperature, toluene, 0.06 mmol **1**, 0.14 mmol MeLi (25 °C, toluene- $d_8$ , 300.20 MHz).

### 3.25.5. NMR spectrum of stoichiometric reaction of H<sub>3</sub>B·NMe<sub>2</sub>D with 1/MeLi

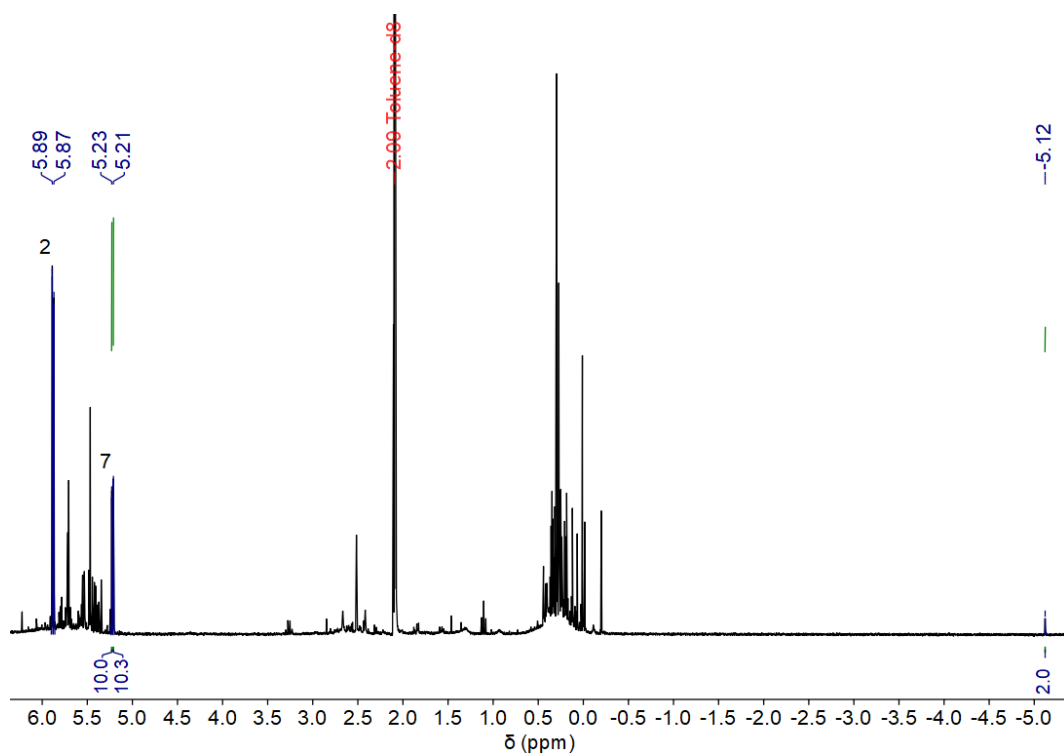

Figure S71. <sup>1</sup>H NMR spectrum of stoichiometric reaction of H<sub>3</sub>B·NMe<sub>2</sub>D with 1/MeLi. Conditions: room temperature, toluene, 0.06 mmol 1, 0.14 mmol MeLi (25 °C, toluene-*d*<sub>8</sub>, 300.20 MHz).

### 3.25.6. NMR spectrum of stoichiometric reaction of H<sub>3</sub>B·NMe<sub>2</sub>H with complex 2

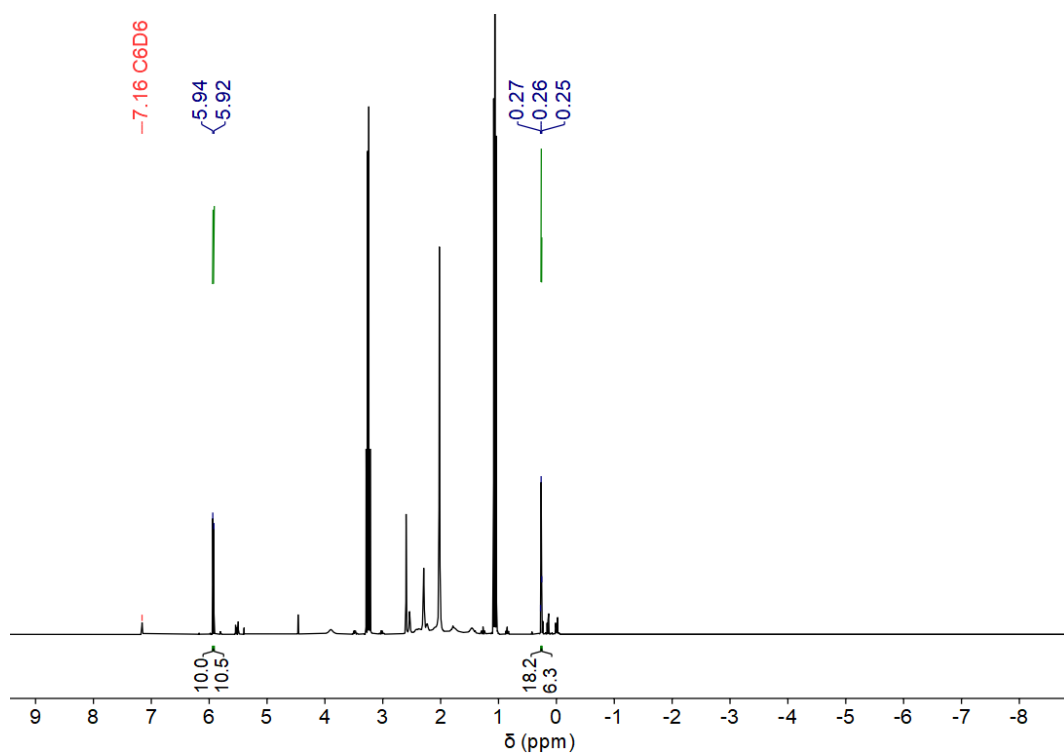

Figure S72. <sup>1</sup>H NMR spectra of stoichiometric reaction of H<sub>3</sub>B·NMe<sub>2</sub>H with complex 2. Conditions: room temperature, benzene, 0.03 mmol 2, 0.06 mmol H<sub>3</sub>B·NMe<sub>2</sub>H (25 °C, benzene-*d*<sub>6</sub>, 400.13 MHz).

### 3.25.7. NMR spectrum of stoichiometric reaction of $\text{H}_3\text{B}\cdot\text{NMe}_2\text{H}$ with complex **4**

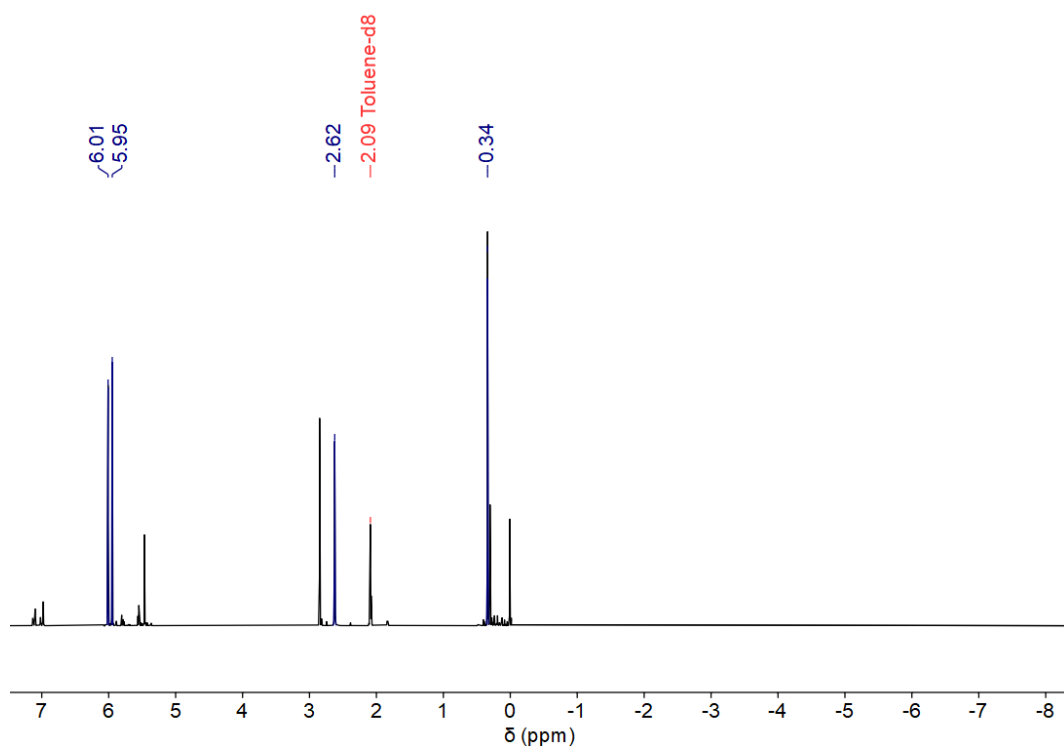

**Figure S73.**  $^1\text{H}$  NMR spectrum of stoichiometric reaction of  $\text{H}_3\text{B}\cdot\text{NMe}_2\text{H}$  with complex **4**. Conditions: room temperature, toluene, 0.06 mmol **4**, 0.14 mmol MeLi (25 °C, toluene- $d_8$ , 300.20 MHz).

### 3.25.8. NMR spectra of stoichiometric reaction of $\text{Li}[\text{NMe}_2\cdot\text{BH}_3]$ with complex **6**

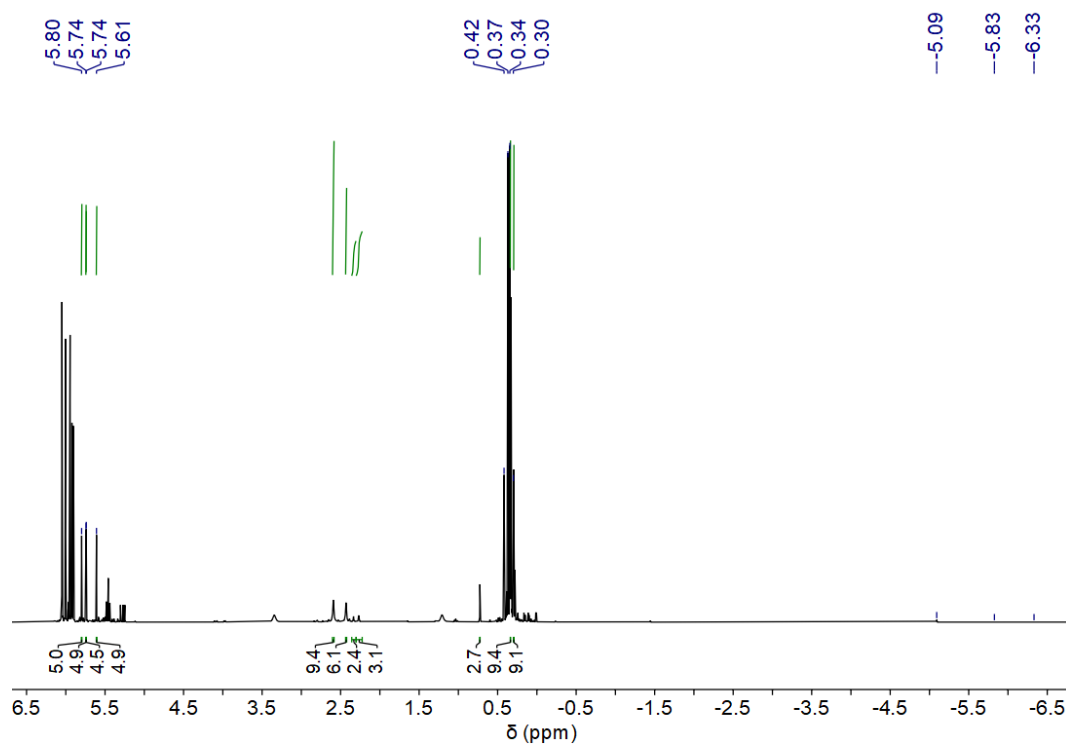

**Figure S74.**  $^1\text{H}$  NMR spectra of stoichiometric reaction of  $\text{Li}[\text{NMe}_2\cdot\text{BH}_3]$  with complex **6**. Conditions: room temperature, benzene, 0.02 mmol **6**, 0.02 mmol  $\text{Li}[\text{NMe}_2\cdot\text{BH}_3]$  (25 °C, benzene- $d_6$ , 400.13 MHz).

### 3.25.9. NMR spectra of the stoichiometric reaction of D<sub>3</sub>B·NMe<sub>2</sub>H with complex 10

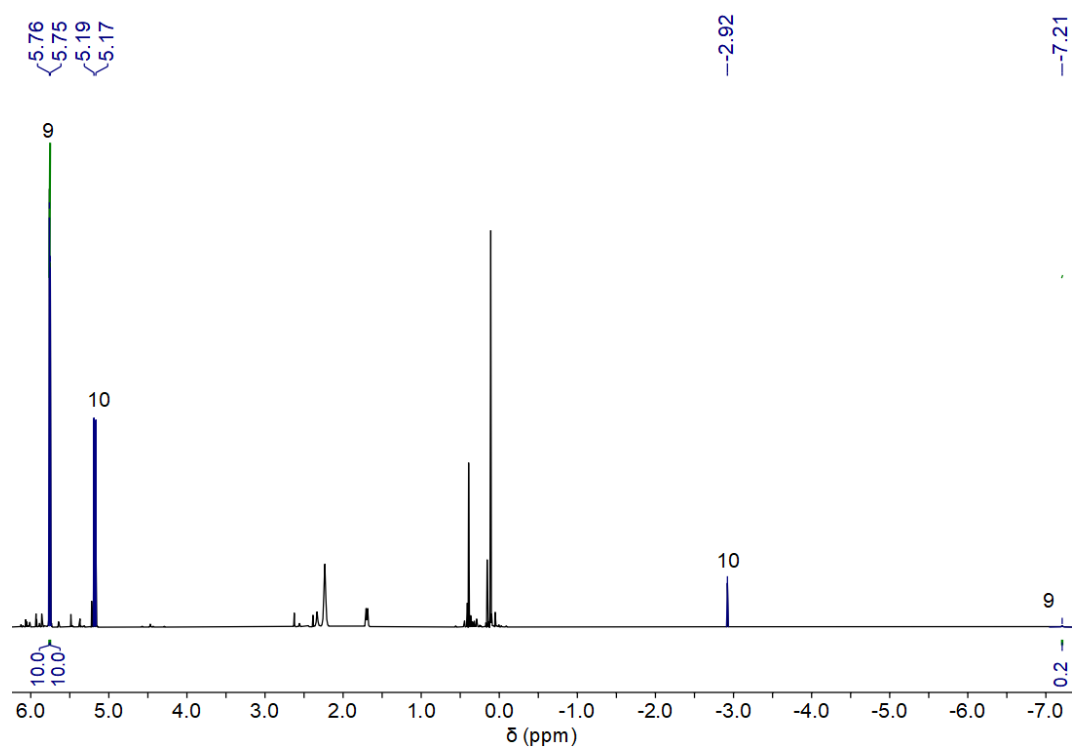

**Figure S75.** <sup>1</sup>H NMR spectrum of stoichiometric reaction of D<sub>3</sub>B·NMe<sub>2</sub>H with complex 10. Conditions: room temperature, benzene, 0.04 mmol 1. (25 °C, benzene-*d*<sub>6</sub>, 300.20 MHz).



## 4. Details of UV/Vis spectroscopy

### 4.1. General information

UV-Vis studies were carried out using a Varian CARY 4000 spectrometer. To ensure the necessary anaerobic conditions for the oxygen and water sensitive zirconocene catalyst system the measurements were performed in a thermostatically controlled Schlenk vessel with a dip optrode (10 mm slit width) and fiber optics input and output.<sup>[1]</sup> Directly before each experiment the baseline was measured. The spectra were smoothed by Origin 2019b.

UV-Vis analysis of **6** and **9** was performed using an *analytikjena specord s 600* diode array photometer. The samples were dissolved in Toluene in a 1 cm quartz cuvette with a Schlenk-Valve. If necessary, the samples were diluted using Schlenk techniques.

### 4.2. Experimental details

#### 4.2.1. Complex 1

In a glovebox complex **1** (6.90 mg, 0.01 mmol) was transferred into a three-neck reaction vessel and dissolved in 31.7 mL of toluene and the measurement was started. The measurements were carried out at 25 °C.

#### 4.2.2. Dilution of MeLi

MeLi (120  $\mu$ L, 0.19 mmol) was added to 16.0 mL of toluene and was titrated with toluene in 5.0 mL steps. The measurements were carried out at 40 °C.

#### 4.2.3. Complex 1 with MeLi

MeLi (12.5  $\mu$ L, 0.02 mmol) was subsequently added to the reaction vessel containing **1** in 31.7 mL of toluene and the measurement started. The measurements were carried out at 25 °C.

#### 4.2.4. Catalytic dehydrocoupling of $H_3B \cdot NMe_2H$

In a glovebox complex **1** (6.90 mg, 0.01 mmol) and  $H_3B \cdot NMe_2H$  (47 mg, 0.80 mmol) were transferred into a three-neck reaction vessel. All components were dissolved in 20.1 mL of toluene. MeLi (12.5  $\mu$ L, 0.02 mmol) was added to the solution and the measurement was started. The measurements were carried out at 25 °C.

### 4.3. UV/Vis spectra

#### 4.3.1. Complex 1

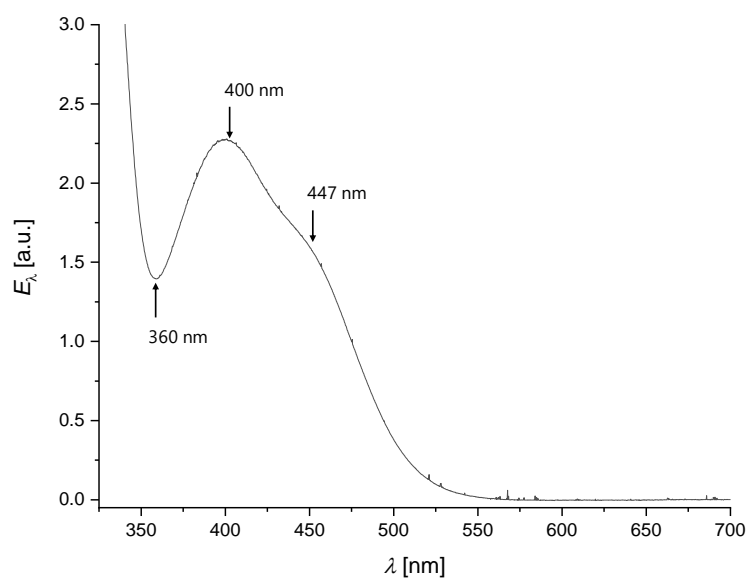

Figure S76. UV-Vis spectra of **1** (0.01 mmol in 31.7 mL of toluene).

#### 4.3.2. Complex 2

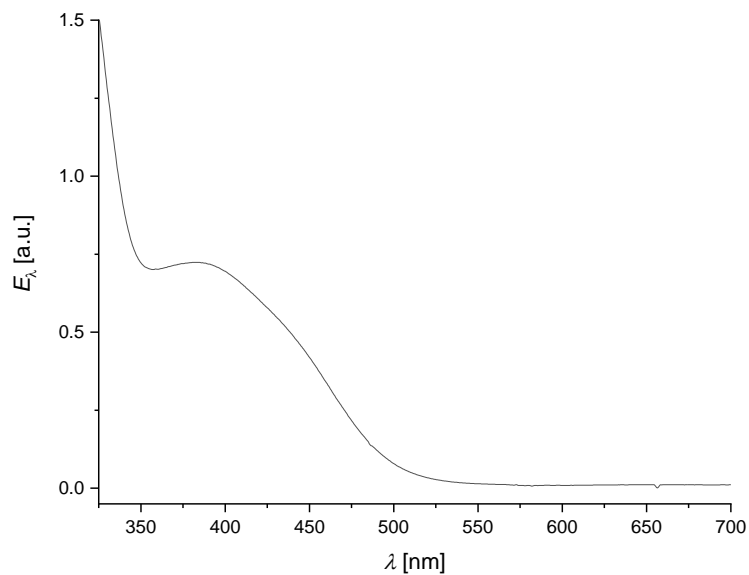

Figure S77. UV-Vis spectra of **2** (0.008 mmol in 6 mL of toluene).

### 4.3.3. Complex 6

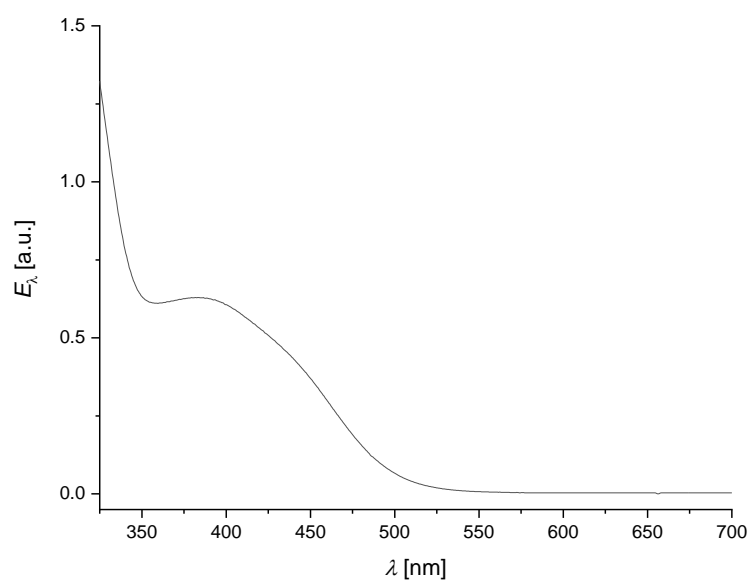

Figure S78. UV-Vis spectra of **6** (0.008 mmol in 6 mL of toluene).

### 4.3.4. Complex 9

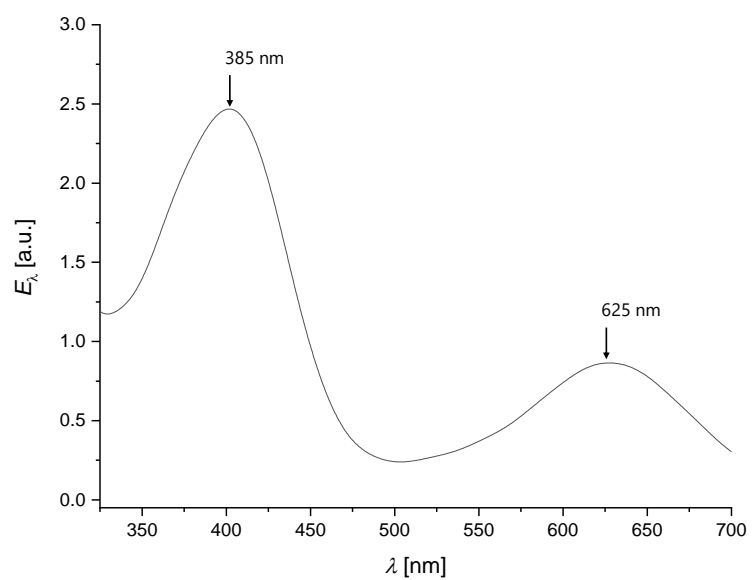

Figure S79. UV-Vis spectra of **9** (0.005 mmol in 4 mL of toluene).

### 4.3.5. Dilution of MeLi

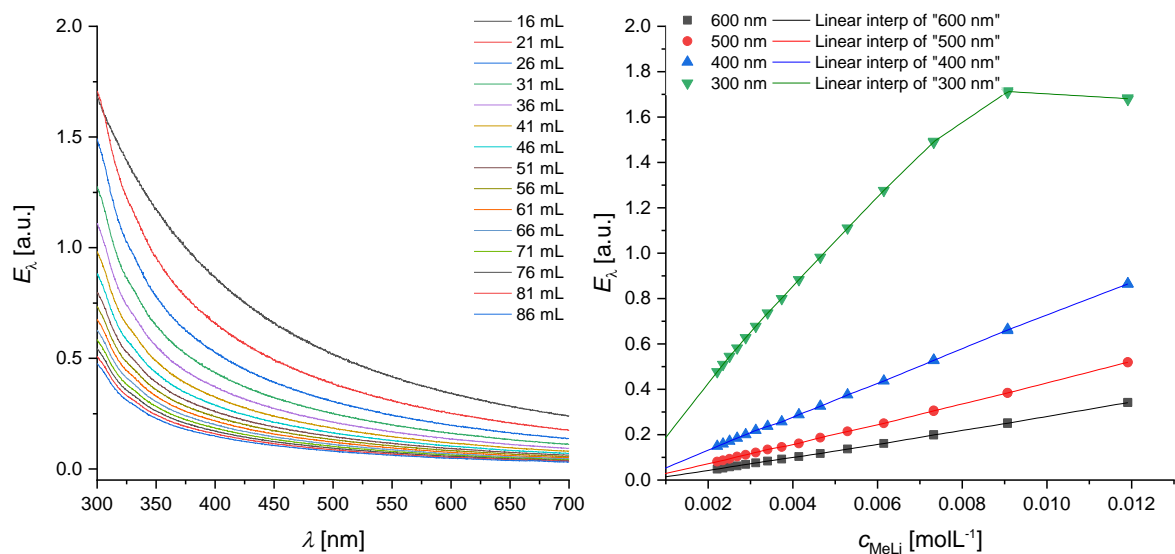

**Figure S80.** UV-Vis spectra of the dilution of MeLi (120  $\mu\text{L}$ , 0.19056 mmol) in toluene at 40 °C (left). Plot of the extinction against  $c_{\text{MeLi}}$  (right).

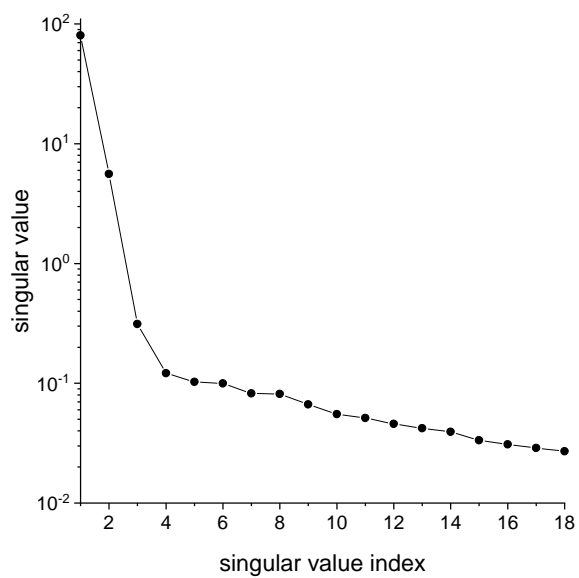

**Figure S81.** Singular Value Decomposition of the dilution of MeLi in toluene.

### 4.3.6. Complex 1 with MeLi

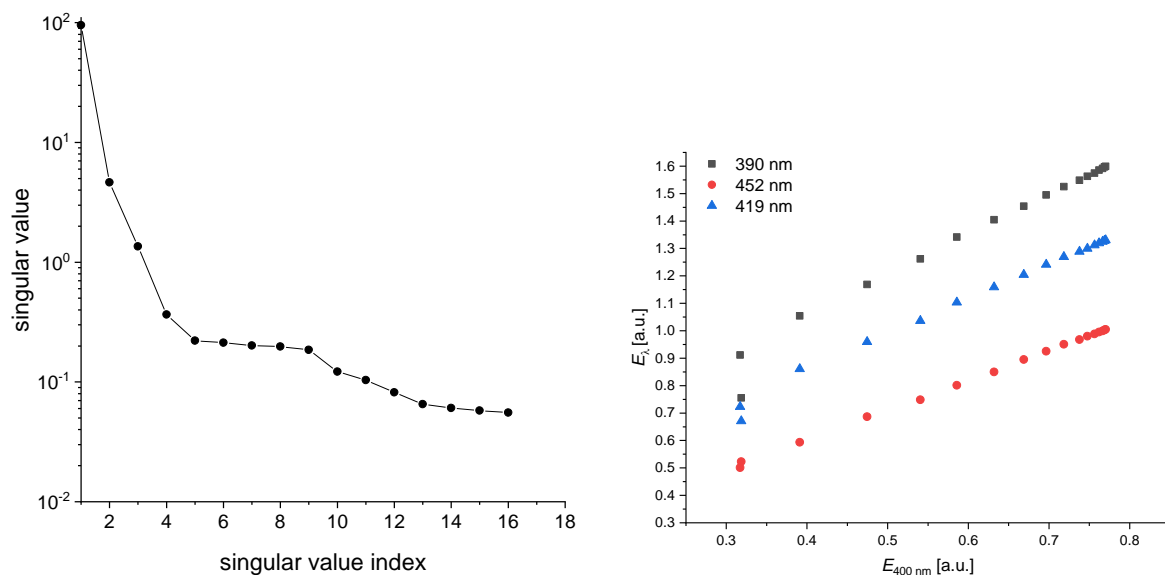

**Figure S82.** Singular Value Decomposition of the **1** activation with MeLi in toluene (left). Extinction diagram of the activation of **1** with MeLi (right).

### 4.3.7. UV/Vis spectra of dehydrocoupling of $\text{H}_3\text{B}\cdot\text{NMe}_2\text{H}$ with **1**/MeLi

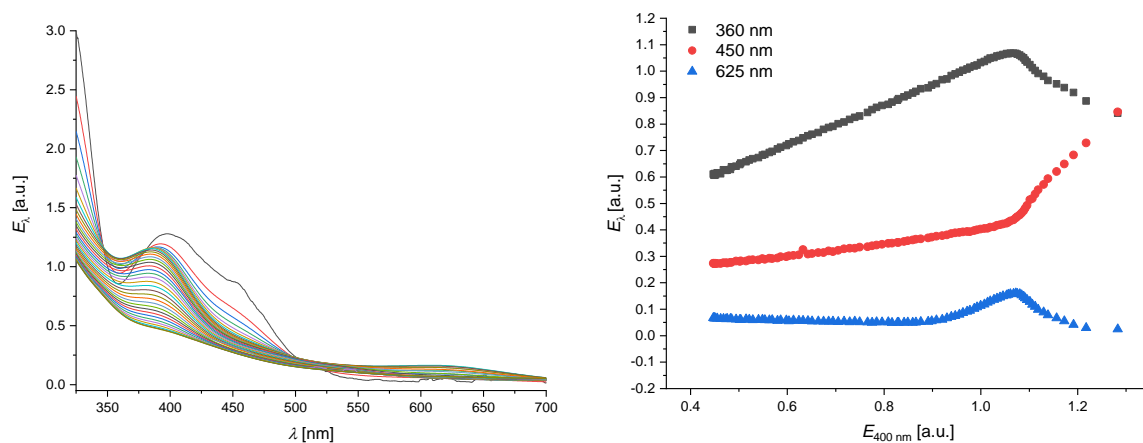

**Figure S83.** Spectra of UV-Vis monitoring of a catalytic dehydrocoupling of  $\text{H}_3\text{B}\cdot\text{NMe}_2\text{H}$  with 2.5 mol% **1** and 5.2 mol% MeLi in 16 mL of toluene at 25 °C, cycle time 90 min (left). Extinction diagram of the catalytic reaction (right).

## 5. Details of vibrational spectroscopy

In this chapter the experimental IR and Raman spectra are presented. Additionally, the overlays of the calculated and experimental infrared spectra are displayed. The used level of theory is given at each specific spectrum.

### 5.1. Experimental and calculated vibrational spectra

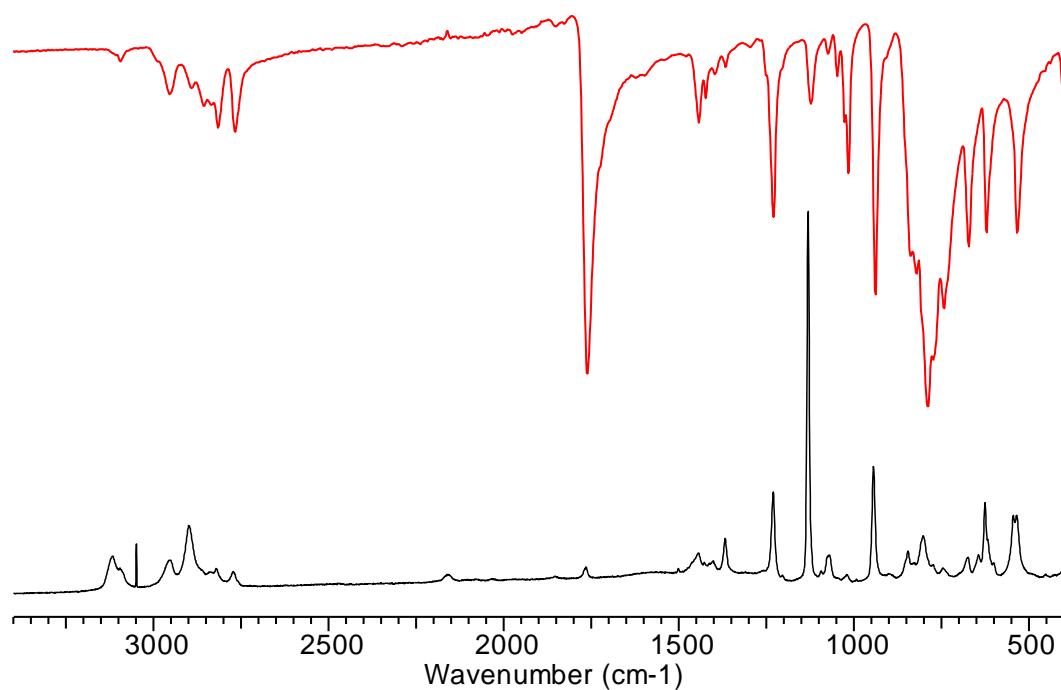

Figure S84. IR (red) and Raman (black) spectrum of complex **4**.

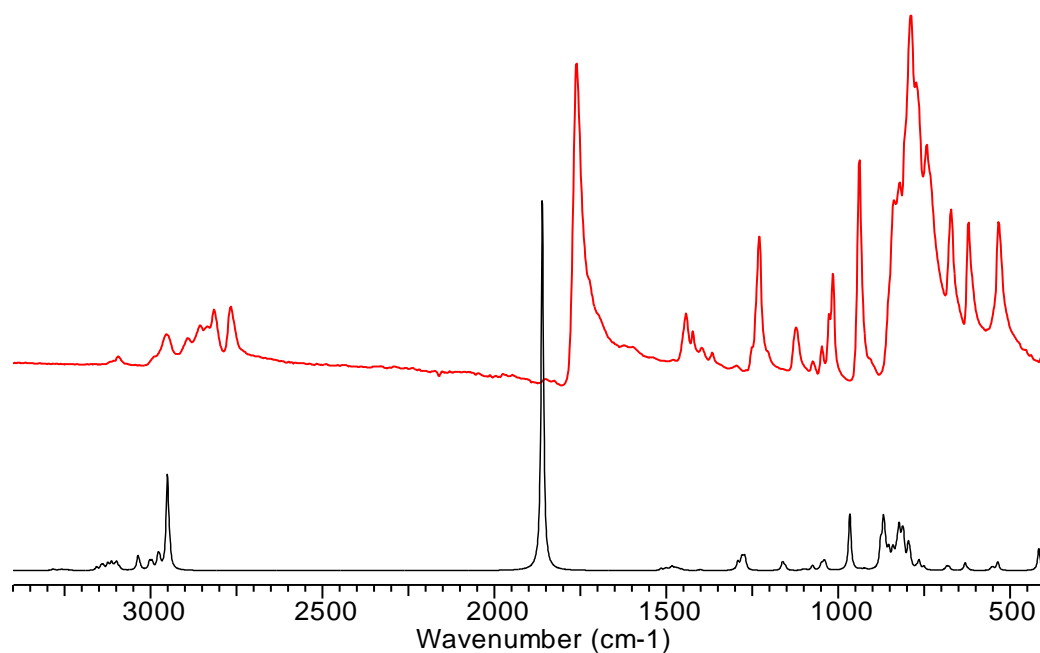

Figure S85. Calculated (black, B3LYP/GD3BJ/def2tzvp) and experimental (red) IR spectrum of **4**.

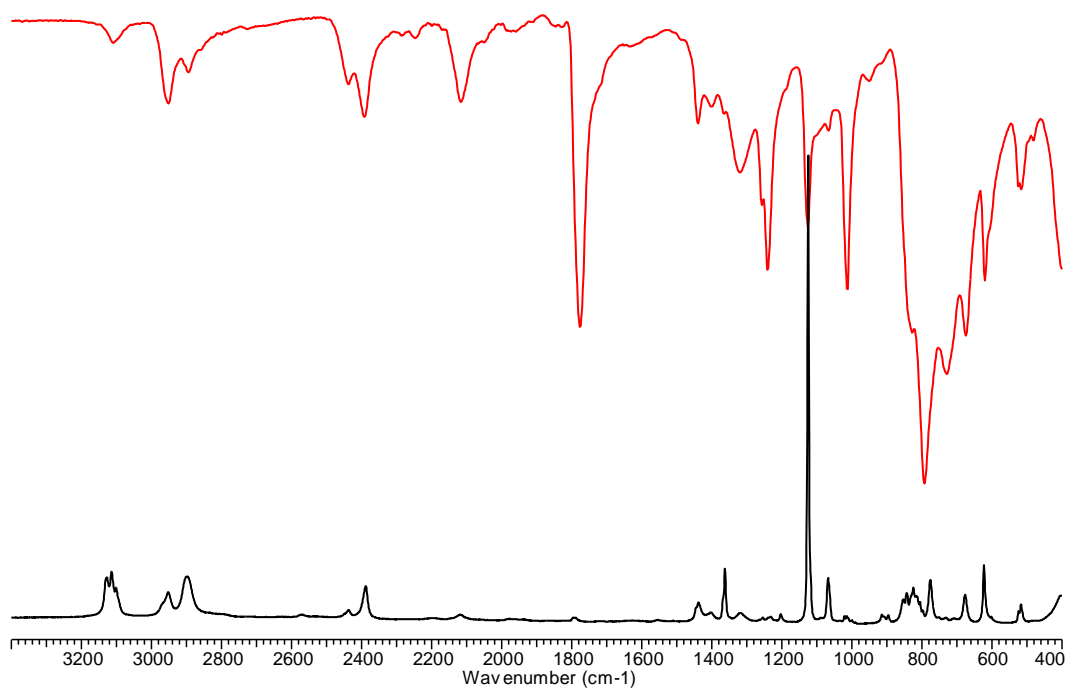

**Figure S86.** IR (red) and Raman (black) spectrum of complex 5.

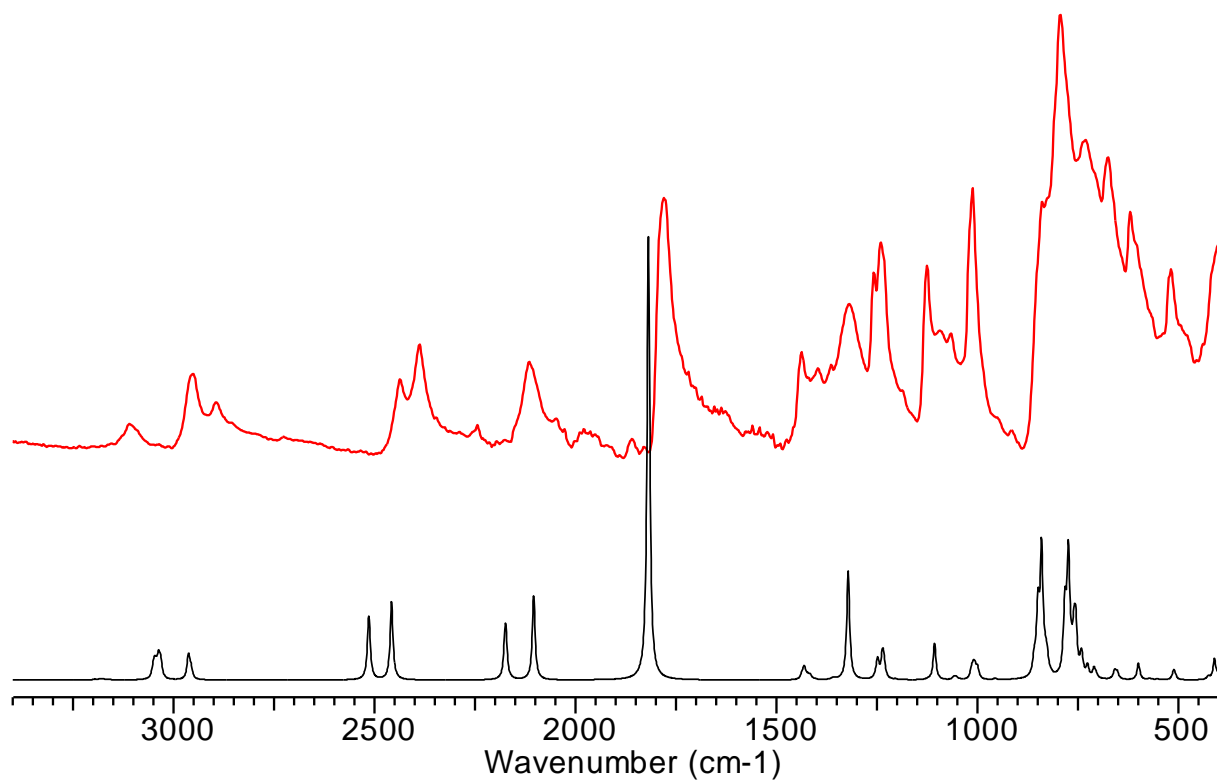

**Figure S87.** Calculated (black, BP86/TZVP/LANL2DZ) and experimental (red) IR spectrum of 5.

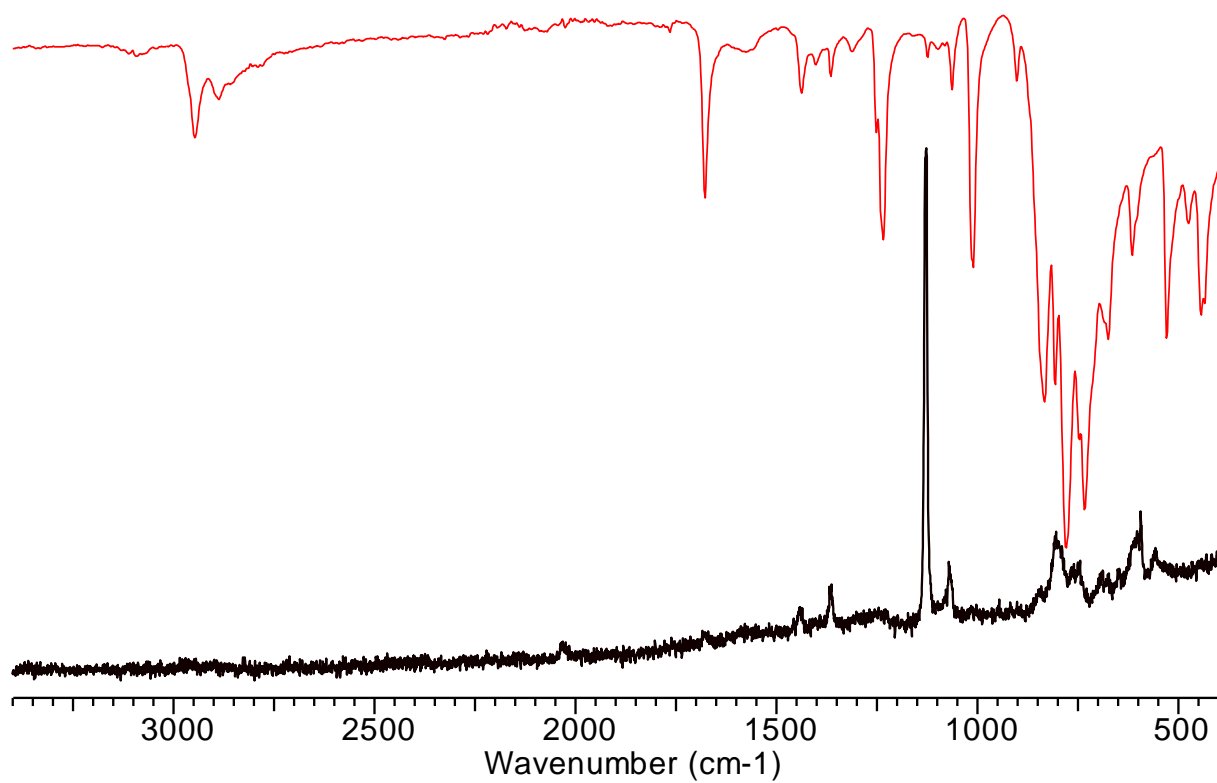

Figure S88. IR (red) and Raman (black) spectrum of complex 7.

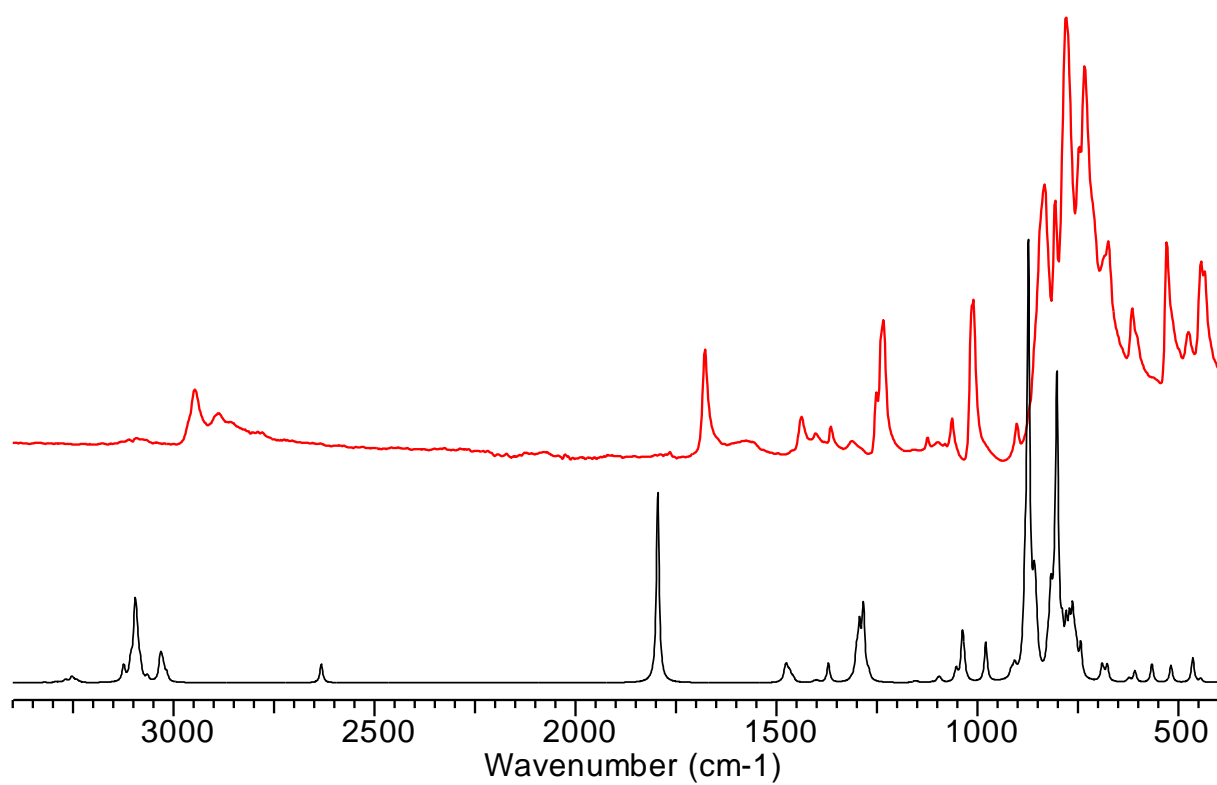

Figure S89. Calculated (black, B3LYP/GD3BJ/def2tzvp) and experimental (red) IR spectrum of 7.



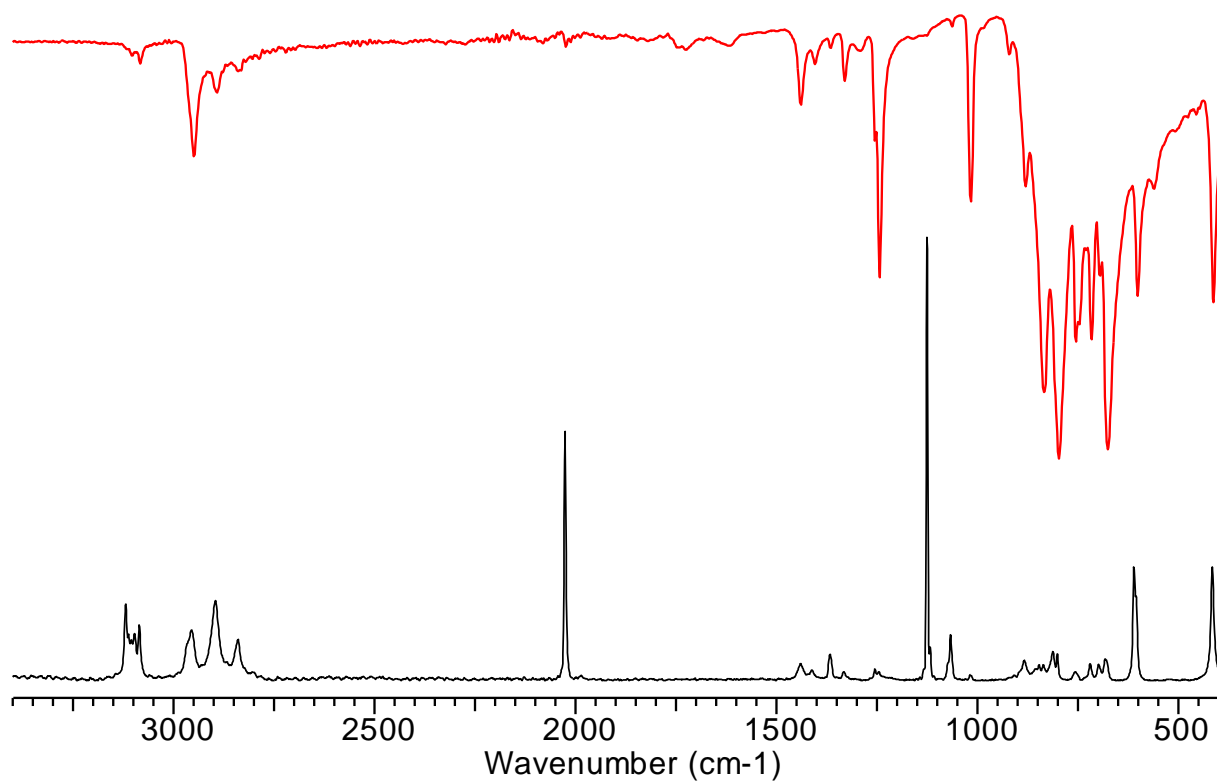

Figure S90. IR (red) and Raman (black) spectrum of complex **8**.

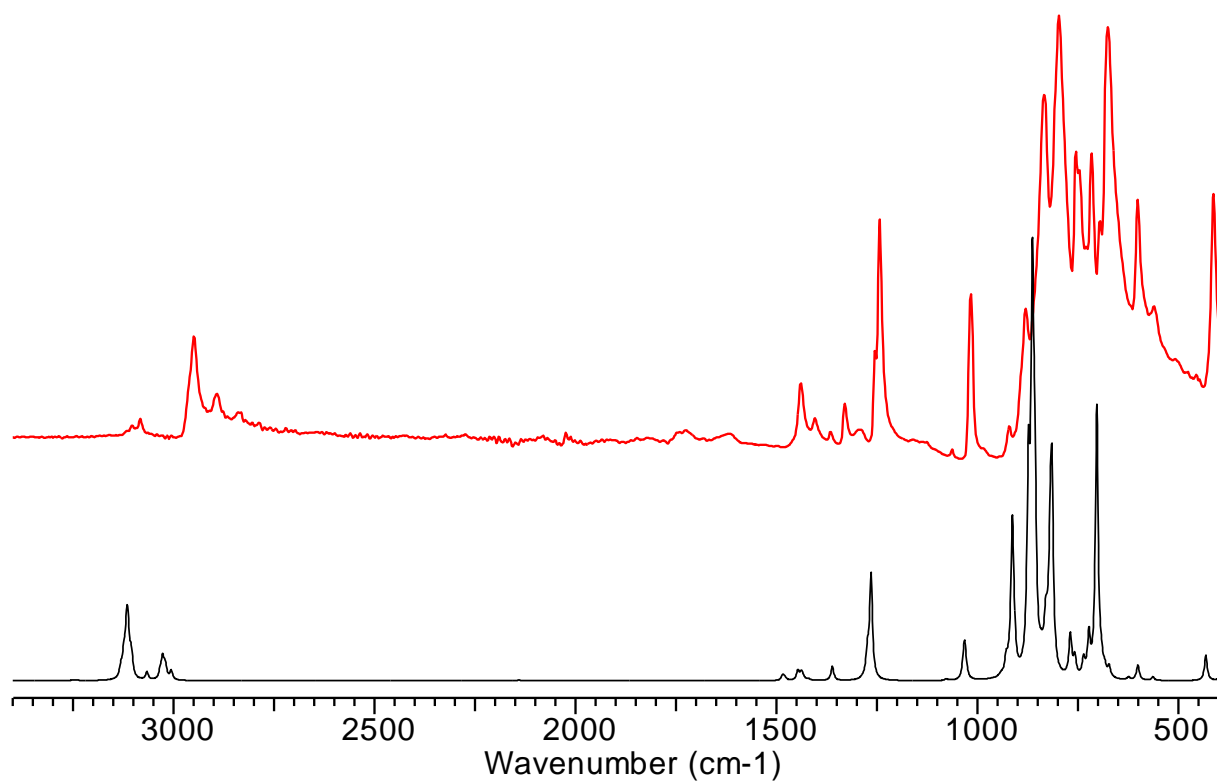

Figure S91. Calculated (black, B3LYP/GD3BJ/def2svp) and experimental (red) IR spectrum of **8**.

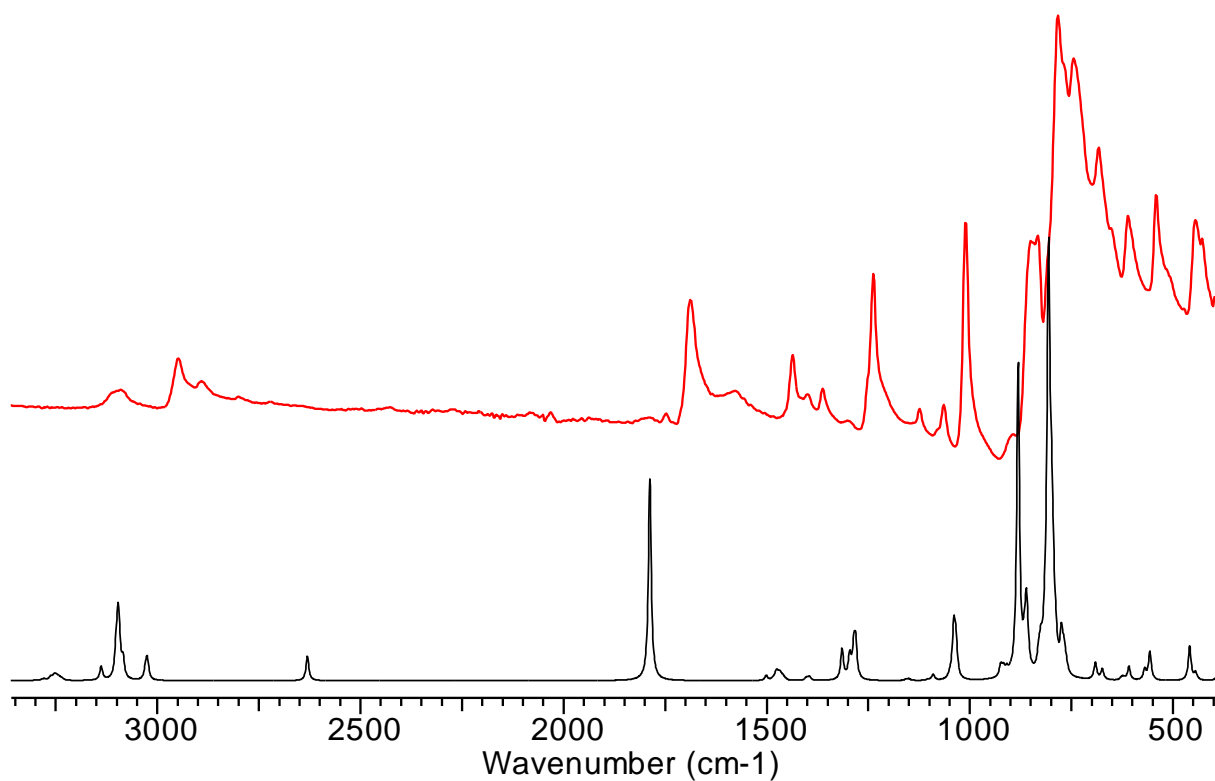

Figure S92. Calculated (black, B3LYP/GD3BJ/def2tzvp) and experimental (red) IR spectrum of **10**.

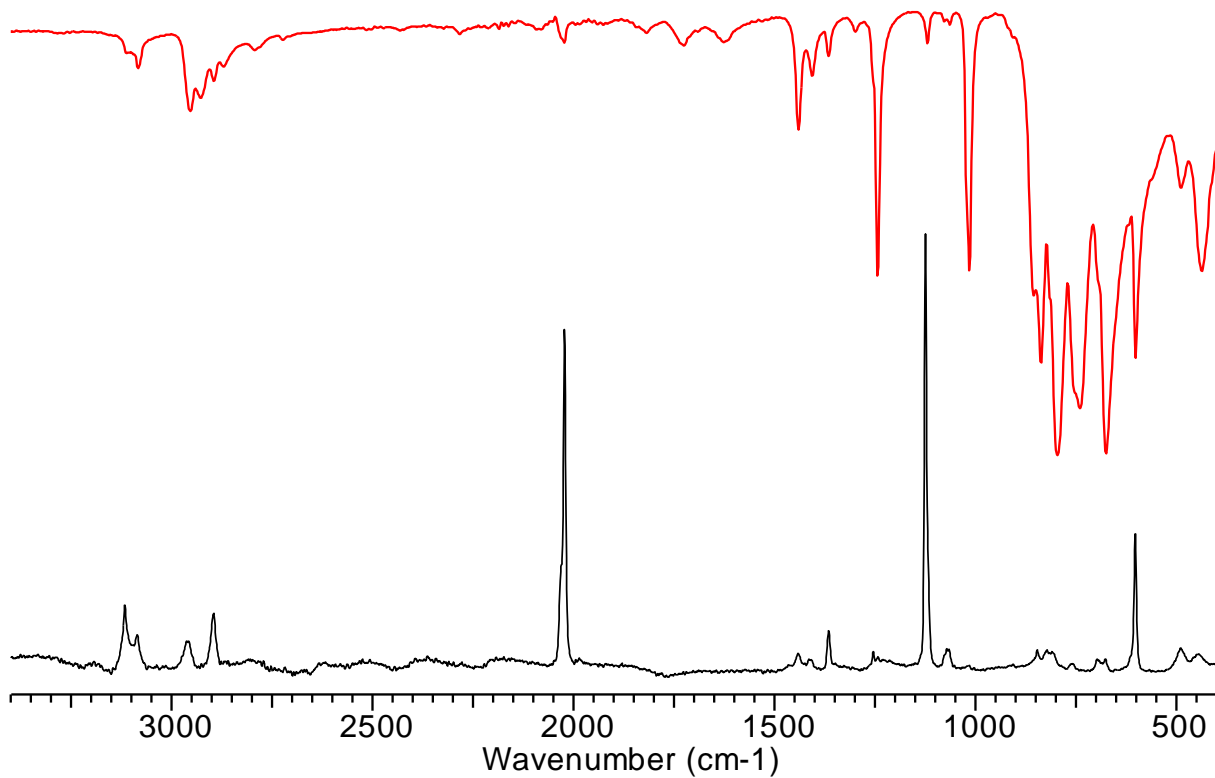

Figure S93. IR (red) and Raman (black) spectrum of complex **11**

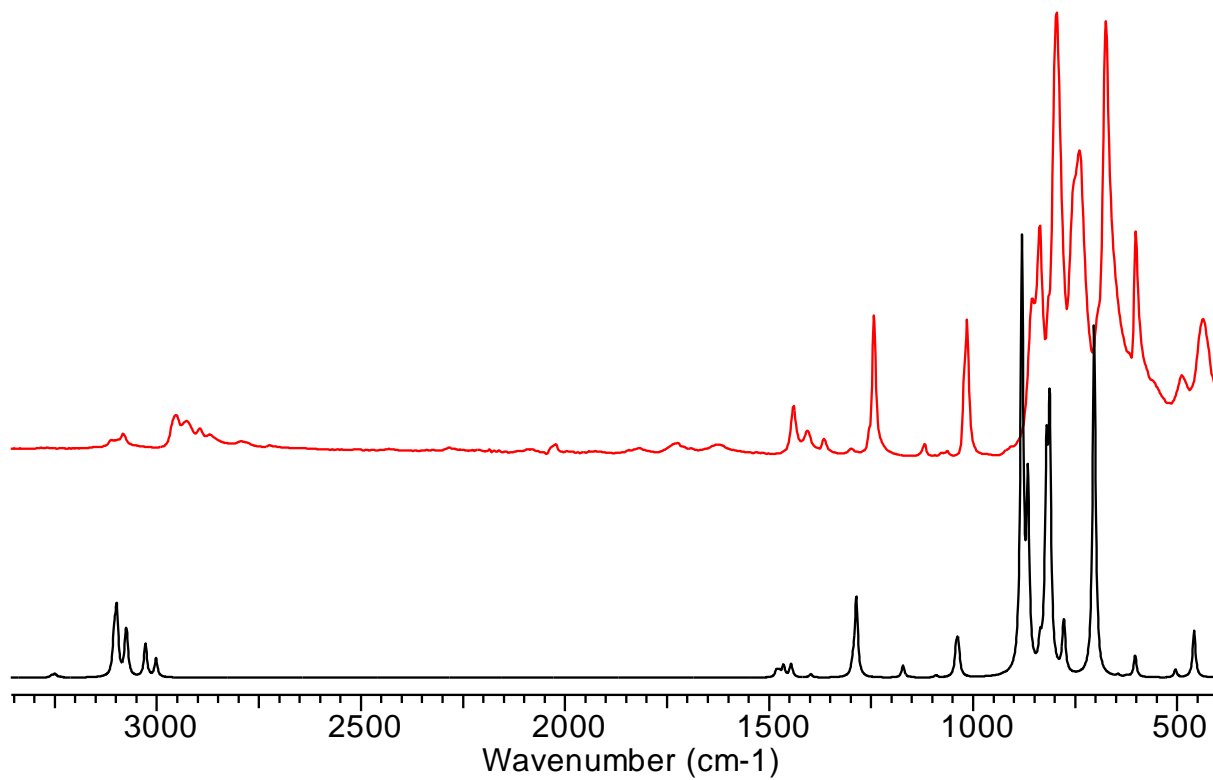

**Figure S94.** Calculated (black, B3LYP/GD3BJ/def2tzvp) and experimental (red) IR spectrum of **11**.

## 6. Computational details

All calculations were carried out with the Gaussian 09 package of molecular orbital program.<sup>[2]</sup> In our calculations, we have used the real-size molecules. First calculations were performed with the pure density functional (DF) BP86<sup>[3]</sup> in combination with the LANL2DZ<sup>[4]</sup> basis set and corresponding effective core potential (ECP) at Zr and the TZVP<sup>[5]</sup> basis set on all other atoms. During a series of unsatisfied calculations, we realised that might be the usage of dispersion correction is more feasibly for the optimization of transition state structures as described before for the mechanistic elucidation of the dehydrocoupling of  $\text{H}_3\text{B}\cdot\text{NMe}_2\text{H}$  using titanocene as catalyst.<sup>[6]</sup> Therefore we switched to the famous hybrid functional density functional method B3LYP<sup>[3,7]</sup> in combination with basis set def2tzvp<sup>[8]</sup> and the empirical dispersion correction GD3BJ<sup>[9]</sup> for all other calculations described herein. Vibrational frequencies were also computed, to include zero-point vibrational energies in thermodynamic parameters and to characterise all structures as minima on the potential energy surface. In order to identify minimum isomeric structures, we carried out relaxed potential energy scans (PES) using BP86 or B3LYP Method and LANL2DZ or def2svp basis set to identify the conformers with the lowest energy. Transition states were proved to be correct using intrinsic reaction coordinates calculation in both directions. Some of these results are presented as selected examples in the following chapter. Our goal was to compare the structures and energetics of all examined reactions of the zirconium complexes. On the basis of the calculated Gibbs free energy we confirmed the observed reaction behaviour. To get an easier access to the calculated structures we have created a multiple xyz file for all optimised structures. This file can be loaded separately as supporting information and opened with e.g. Mercury.<sup>[10]</sup>

### 6.1. Investigation of the metal free dehydrogenation of amine boranes and formation of amino boranes and diboranes

In this chapter the main results of our calculations on metal-free dehydrogenation and formation of the observed products are described. We evaluated these reactions, corresponding transition states and energy values to compare these directly with the calculated values for the metal-centred reactions at the same level of theory.

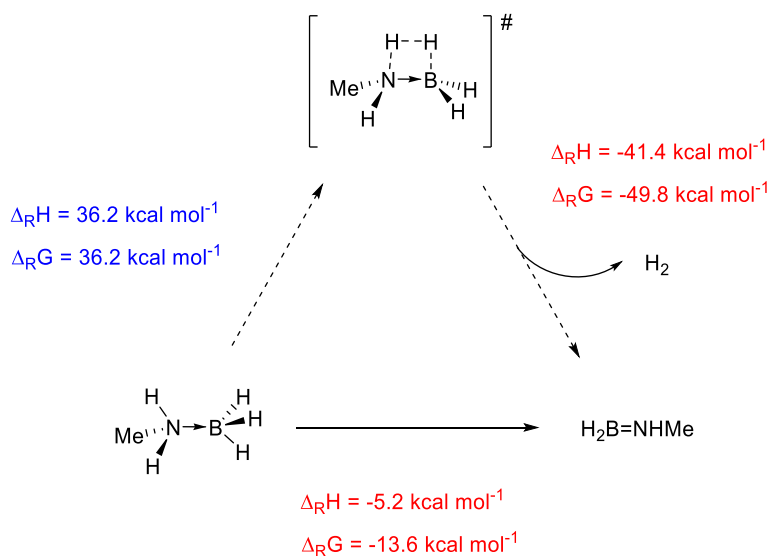

Figure S95. Calculated energies for metal-free intramolecular dehydrogenation of  $\text{H}_3\text{B}\cdot\text{NMe}_2\text{H}$ .

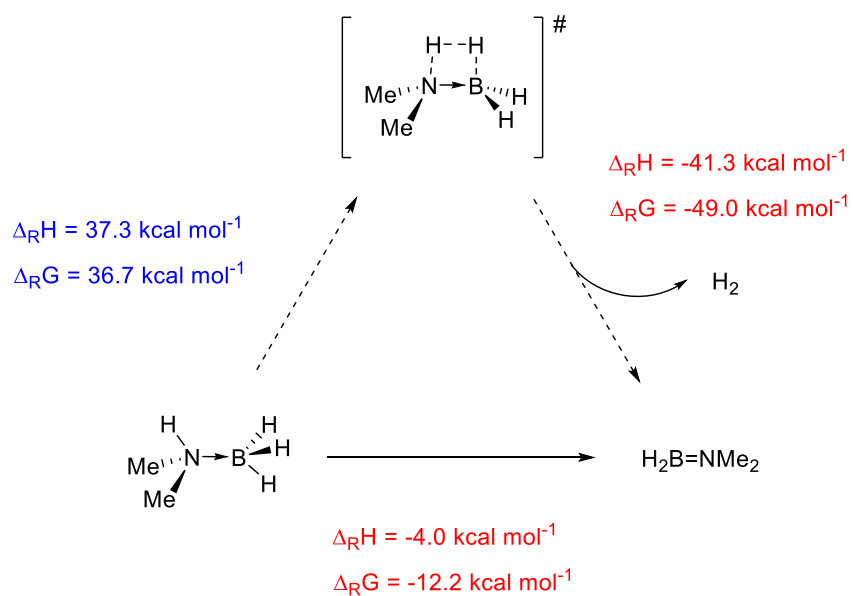

**Figure S96.** Calculated energies for metal-free intramolecular dehydrogenation of  $\text{H}_3\text{B}\cdot\text{NMe}_2\text{H}$ .

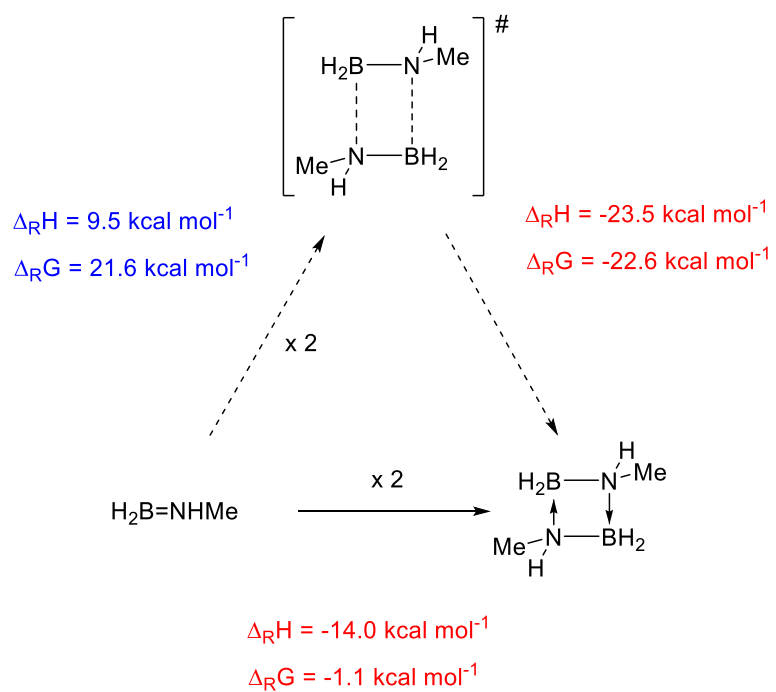

**Figure S97.** Calculated energies for metal-free formation of  $(\text{H}_2\text{BNMeH})_2$ .

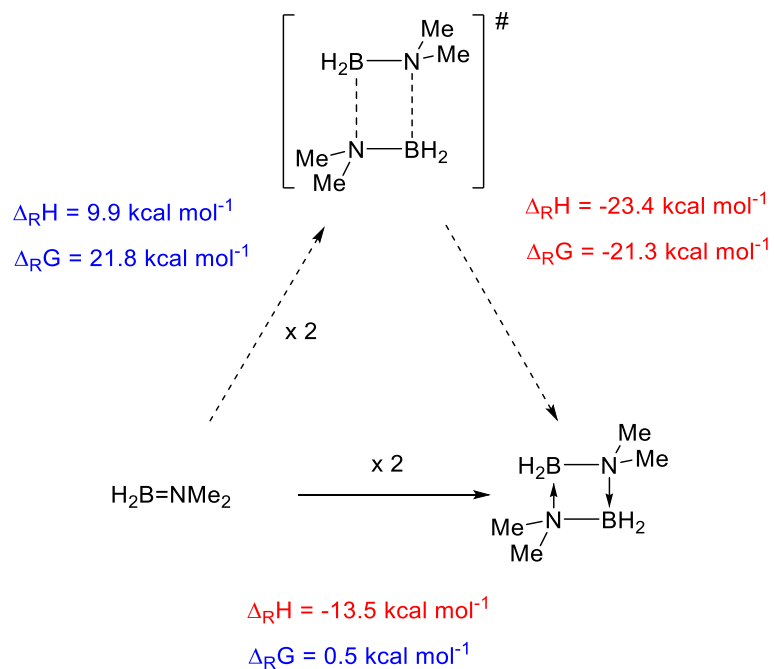

**Figure S98.** Calculated energies for metal-free formation of  $(\text{H}_2\text{BNMeH})_2$ .

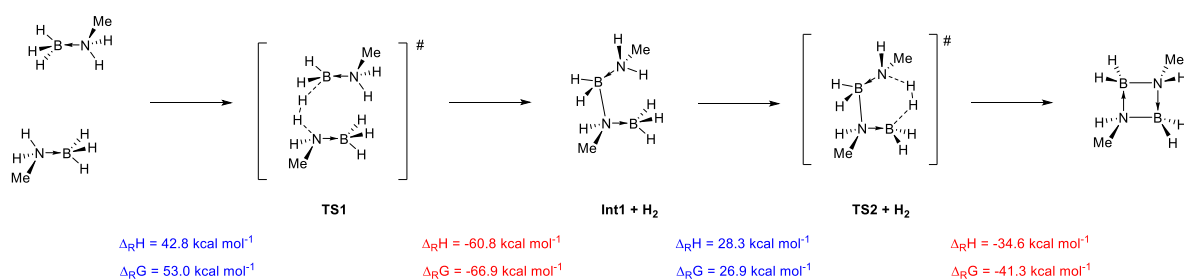

**Figure S99.** Calculated energies of metal-free intermolecular dehydration of  $\text{H}_3\text{B}\cdot\text{NMeH}_2$ .

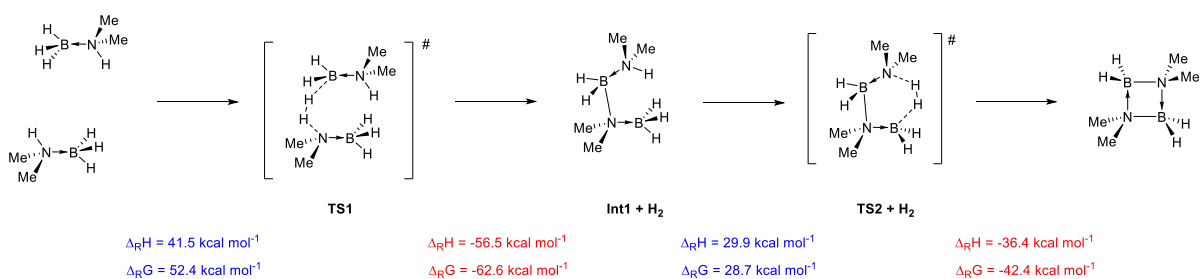

**Figure S100.** Calculated energies of metal-free intermolecular dehydrocoupling of  $\text{H}_3\text{B}\cdot\text{NMe}_2\text{H}$ .

## 6.2. Investigation of the formation of linear diborazane by reaction of amino borane and amin borane

For this study, the 2D potential energy surface (2D-PES) was calculated for the convergence of amine borane to amino borane. With the help of the three-dimensional representation two main reaction paths were identified. A more careful analysis revealed that along the first reaction path an additional thermodynamic basin was found. This corresponds to the formation of the  $\mu$ -aminodiborane and free amine, which were also observed experimentally.

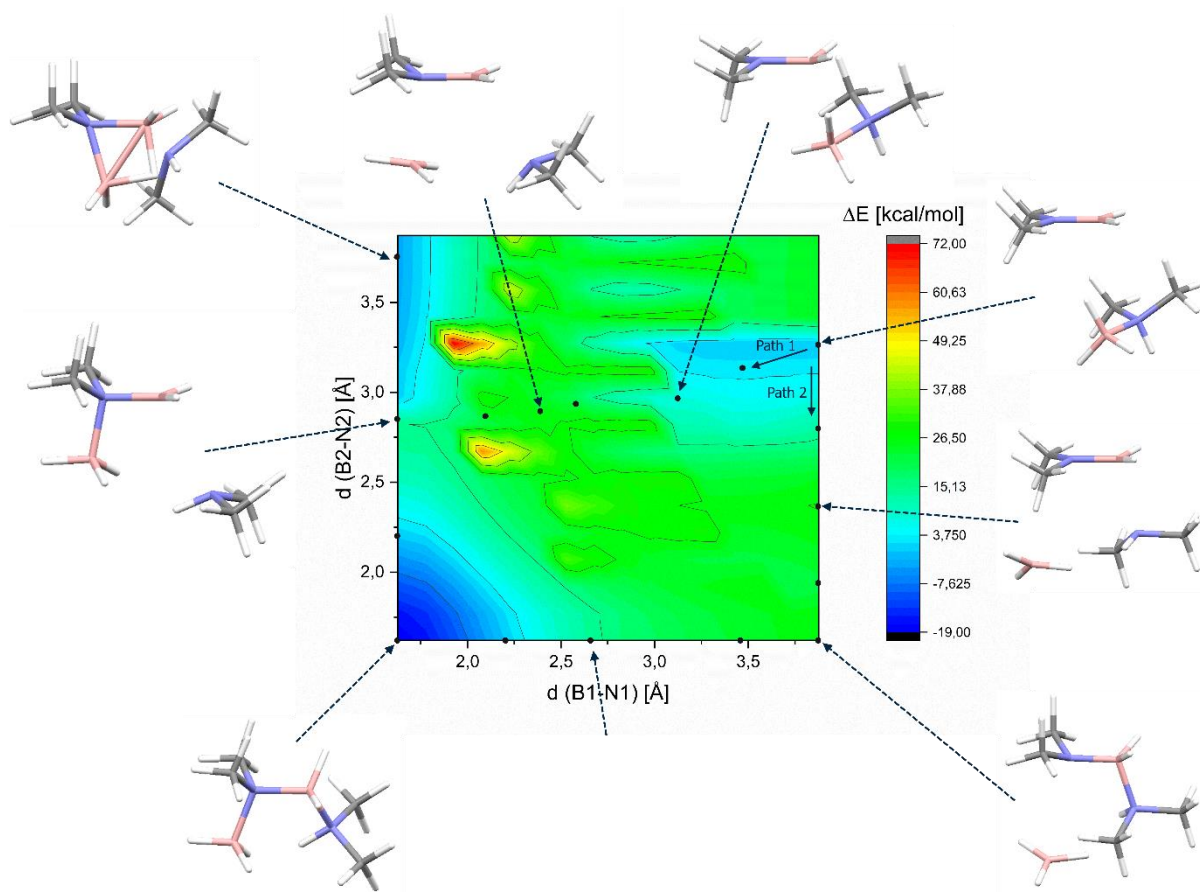

Figure S101. Calculated 2D PES of the convergence of  $\text{H}_3\text{B-NMe}_2\text{H}$  to  $\text{H}_2\text{BNMe}_2$ .

## Coupling of $\text{H}_2\text{BNMe}_2$ and $\text{H}_3\text{B}\cdot\text{NMe}_2\text{H}$

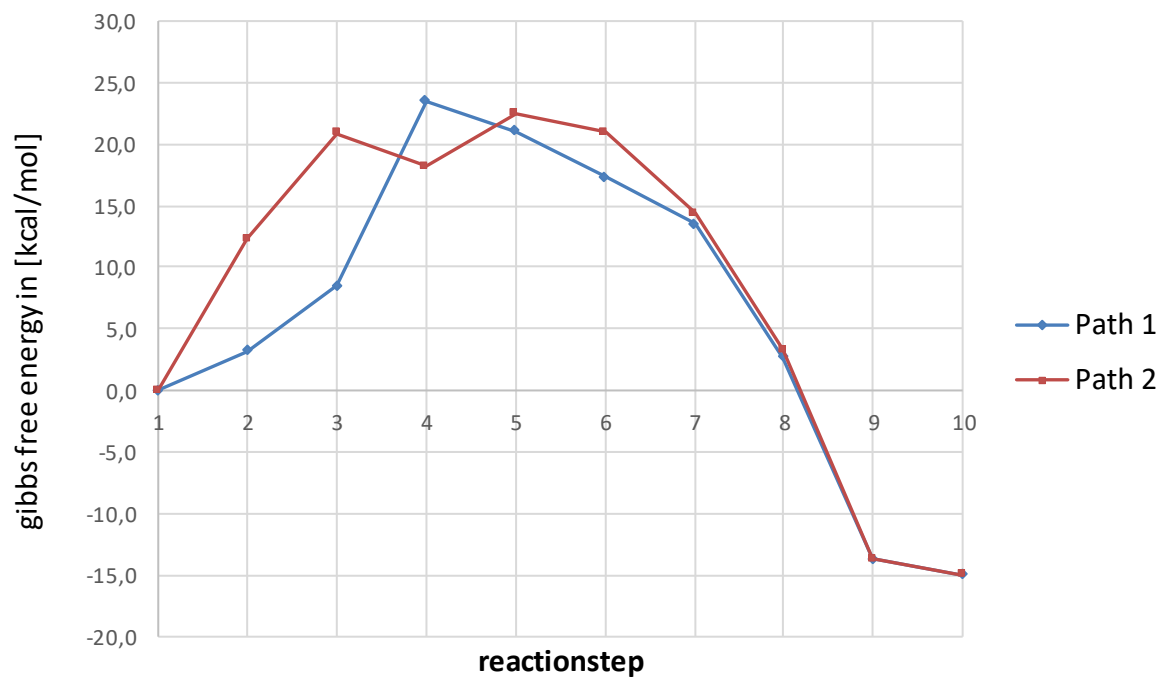

**Figure S102.** Calculated energy profile of the two different calculated reaction paths.



### 6.3. Investigation of the on-metal dehydrogenation of amine borane

In this chapter the main results of our calculations of on-metal dehydrogenation and formation of the observed products are described. Furthermore, we tried to investigate the interconversion process from the postulated dihydrate complex  $[\text{Zr}_2\text{H}_2]$  to the experimentally observed complexes **7** and **9**.

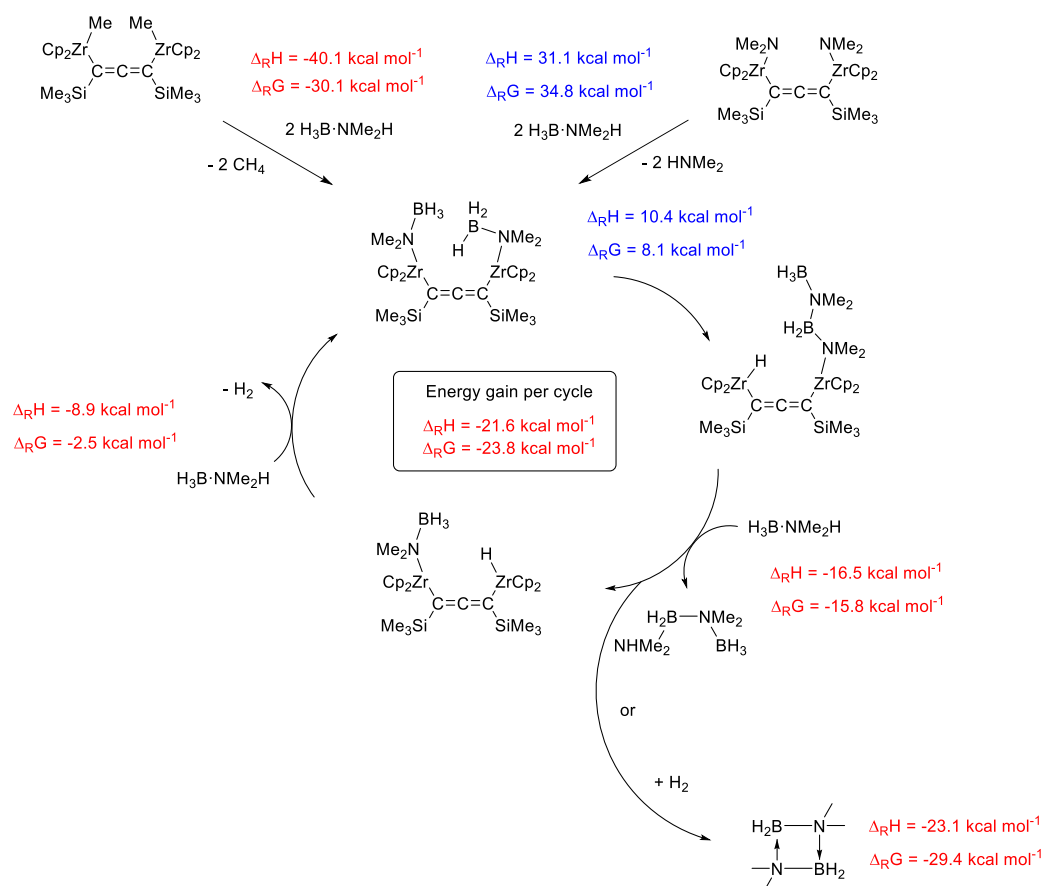

**Figure S103.** Proposed reaction sequence for dehydrogenation and formation of cyclic diborazane at the allenediide bridged catalyst system.

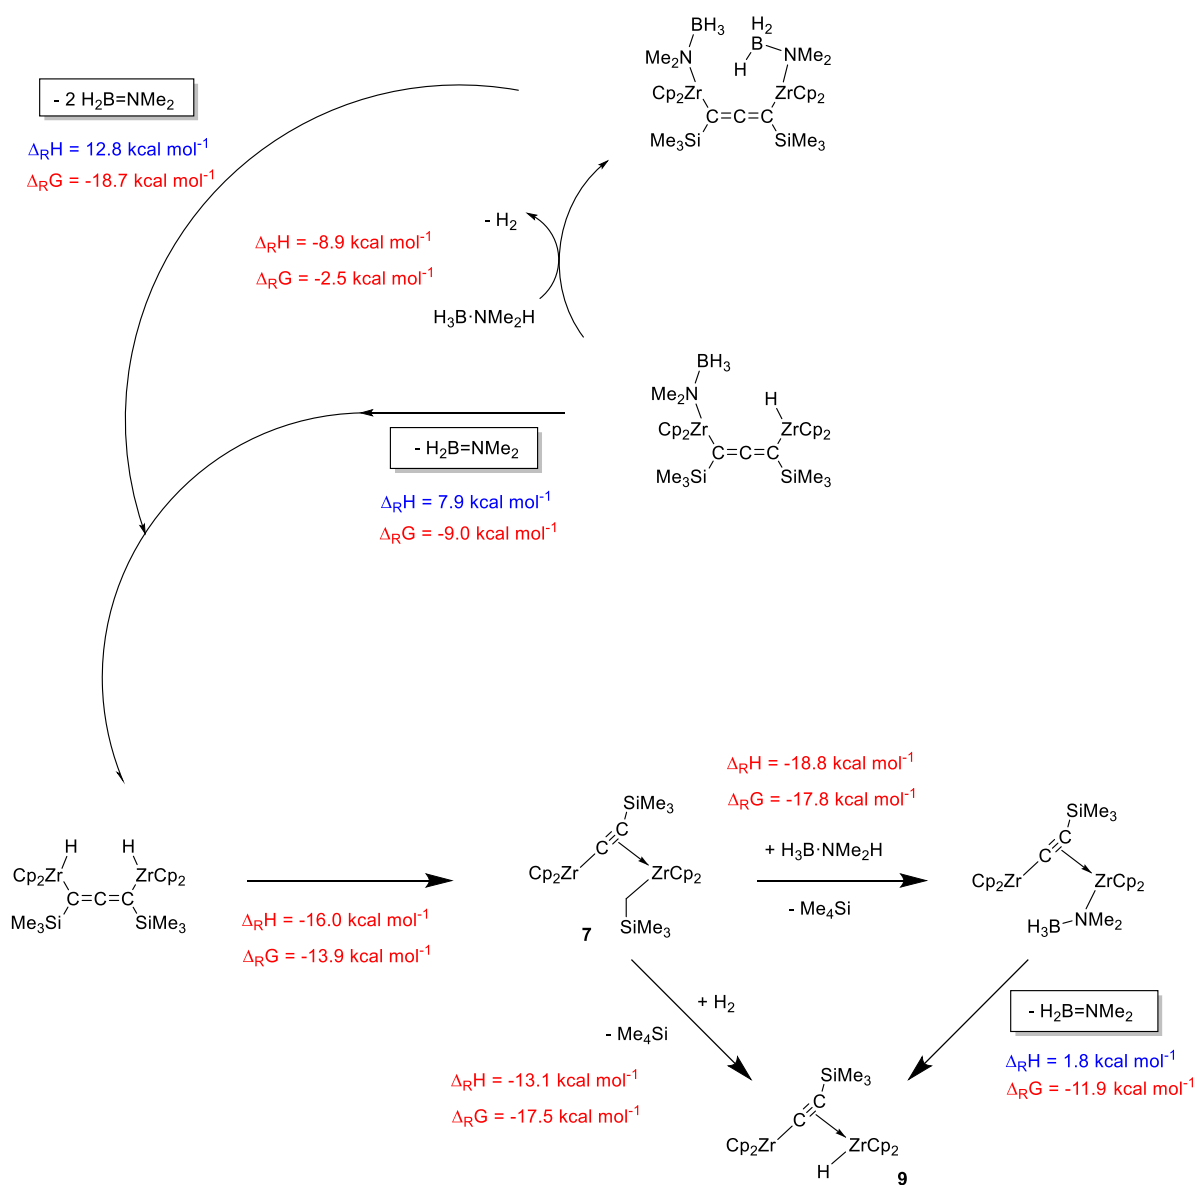

**Figure S104.** Thermodynamic consideration of a possible conversion of the alleediide bridged catalyst system into the complexes **7** and **9**.

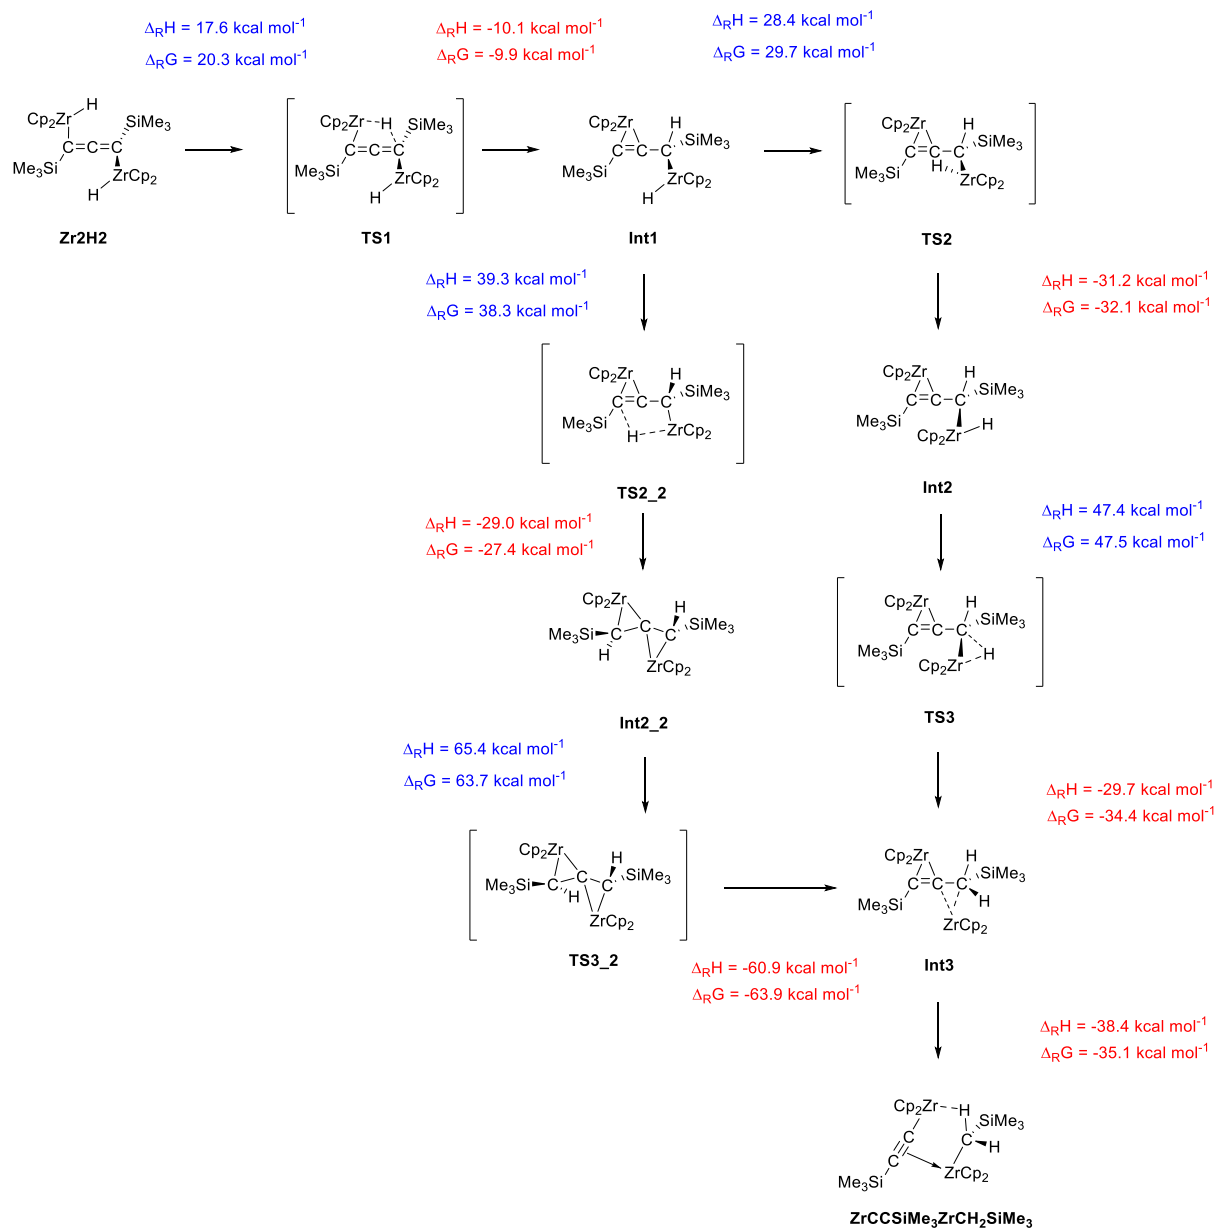

**Figure S105.** Details of calculations for the transformation of the assumed [Zr<sub>2</sub>H<sub>2</sub>] complex into the complex **7** including transition state structures. The high energy barriers along both considered pathways reveal that the observed reaction must follow a herein unconsidered pathway.

## 6.4. Investigation of the bond situation in complexes **7**, **9** and **10**

As we describe in the main section “Discussion of the bond situation in dinuclear complexes **7**, **9**, and **10** and possible implications for catalysis” of this Paper we first calculated the gibbs free energies of the different connectivity modes as well as their transition state energies of **7** and **10**.

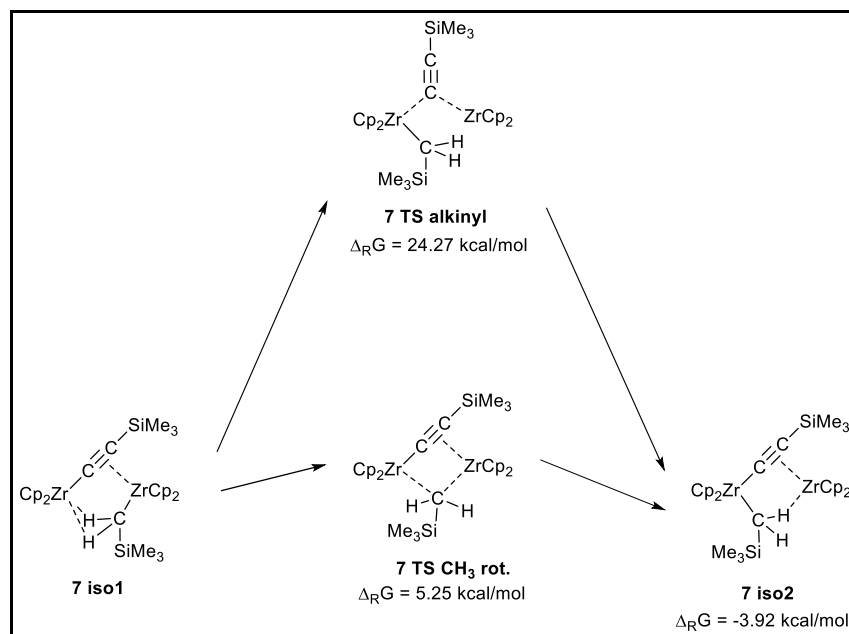

**Figure S106.** Gibbs free energies of different isomers of **7** as well as their transition states at B3LYP/GD3BJ/def2tzvp level of theory (All energies are referred to **7 iso1**).

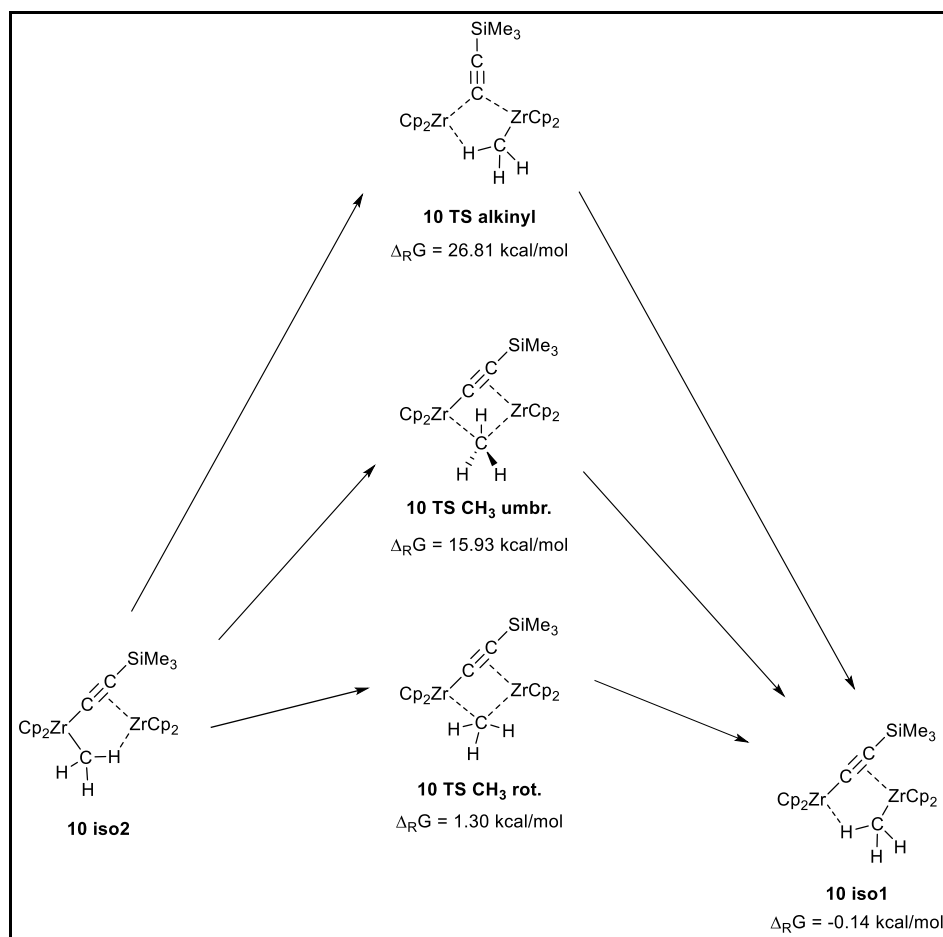

**Figure S107.** Gibbs free energies of different isomers of **10** as well as their transition states at B3LYP/GD3BJ/def2tzvp level of theory (All energies are referred to **10 iso2**).

Followed by this we had a briefly look on the electronical situation of these Complexes. Therefore, we proofed the stability of the wave functions with respect to restricted/unrestricted Hartree-Fock RHF/UHF or restricted/unrestricted Kohn-Sham RKS/UKS instabilities, in order to analyse the potential binuclear Zr(III/III) complexes. In this context we proofed the different optimized structures (B3LYP/GD3BJ/def2tzvp) of the both connectivity motives Zr(IV/II) and Zr(III/III) of **7** and **10**. While the KS wave function based on the hybrid DF (B3LYP), for all four structures, showed no instabilities, the HF solution exhibited a low-lying, "broken-symmetry" open-shell singlet state for both Zr(III/III) motif of **7** and **9**. While the structures that were optimised using the B3LYP functional show good agreement with experimental structures the electronic energy should only be considered as a rough approximation due to incorrect treatment of the non-dynamic correlation. With a closer look on the HF spin density plots (Figures S106-108) of these Zr(III/III) complexes **7**, **9** and **10** they are best described as ligand assisted (CCSiMe<sub>3</sub>) antiferromagnetic coupled binuclear zirconium (III) complexes.

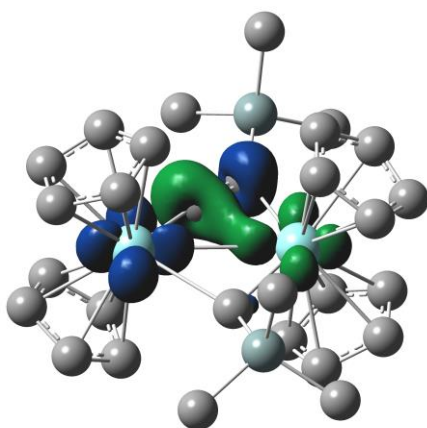

**Figure S108.** Plot of the spin density of complex **7** at HF/def2tzvp level of theory (iso0.007).

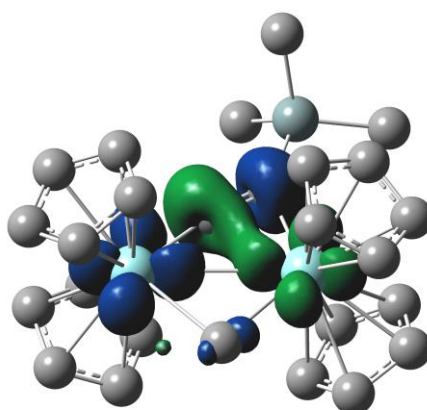

**Figure S109.** Plot of the spin density of complex **9** at HF/def2tzvp level of theory (iso0.007).

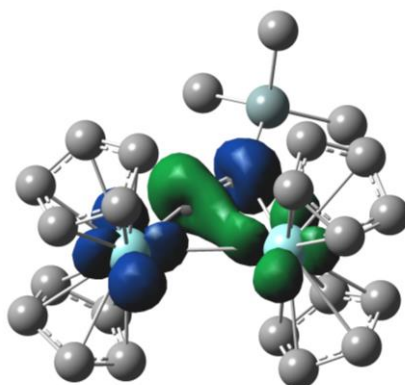

**Figure S110.** Plot of the spin density of complex **10** at HF/def2tzvp level of theory (iso0.007).

## 6.5. Summary of thermodynamic values for all calculated molecular structures

**Table S2.** Calculated values for all optimised structures. The energetically lowest isomer was marked with a star and its energies were used for the thermodynamic calculations.

| Compound                       | Nimag | HF           | ZPE [kcal/mol] | H <sub>tot</sub> [a.u.] | G <sub>tot</sub> [a.u.] | Method     | Basisset | min. Iso |
|--------------------------------|-------|--------------|----------------|-------------------------|-------------------------|------------|----------|----------|
| hydrogen                       | 0     | -1.177586    | 6.174720       | -1.164441               | -1.179255               | BP86       | TZVP     | *        |
| hydrogen                       | 0     | -1.179790    | 6.315280       | -1.166421               | -1.181216               | B3LYP-GDBJ | def2tzvp | *        |
| methane Td                     | 0     | -40.529900   | 27.335680      | -40.482518              | -40.503674              | BP86       | TZVP     | *        |
| methane Td                     | 0     | -40.539445   | 27.988260      | -40.491030              | -40.512156              | B3LYP-GDBJ | def2tzvp | *        |
| tetramtehylsilane Td           | 0     | -449.265859  | 89.967320      | -449.112077             | -449.152750             | BP86       | TZVP     | *        |
| tetramtehylsilane Td           | 0     | -449.314979  | 92.142700      | -449.157868             | -449.198267             | B3LYP-GDBJ | def2tzvp | *        |
| dimethylamin                   | 0     | -135.2083552 | 56.113770      | -135.113517             | -135.144447             | BP86       | TZVP     | *        |
| Borane D3h                     | 0     | -26.6252078  | 16.458580      | -26.595150              | -26.616524              | B3LYP-GDBJ | def2tzvp |          |
| methylaminborane               | 0     | -122.5888307 | 61.790720      | -122.484573             | -122.516355             | B3LYP-GDBJ | def2tzvp |          |
| dimethylaminborane             | 0     | -161.8752203 | 77.290660      | -161.745093             | -161.779939             | BP86       | TZVP     | *        |
| dimethylaminborane             | 0     | -161.9163385 | 79.494870      | -161.782803             | -161.817481             | B3LYP-GDBJ | def2tzvp | *        |
| TS dehyd. methylaminborane     | 1     | -122.5240219 | 57.342420      | -122.426820             | -122.458704             | B3LYP-GDBJ | def2tzvp |          |
| TS dehyd. Dimethylaminborane   | 1     | -161.8148850 | 72.598780      | -161.691898             | -161.727843             | BP86       | TZVP     |          |
| TS dehyd. Dimethylaminborane   | 1     | -161.8496369 | 74.728310      | -161.723435             | -161.758932             | B3LYP-GDBJ | def2tzvp |          |
| MeHNBH2                        | 0     | -121.4081214 | 48.001700      | -121.326382             | -121.356845             | B3LYP-GDBJ | def2tzvp |          |
| Me2NBH2 C2V                    | 0     | -160.6944934 | 63.699980      | -160.586542             | -160.619686             | BP86       | TZVP     | *        |
| Me2NBH2 C2V                    | 0     | -160.7336574 | 65.606910      | -160.622769             | -160.655736             | B3LYP-GDBJ | def2tzvp | *        |
| linear diborazane iso1         | 0     | -322.5841544 | 143.640980     | -322.343075             | -322.390613             | BP86       | TZVP     |          |
| linear diborazane iso2         | 0     | -322.5841545 | 143.6405       | -322.343076             | -322.390614             | BP86       | TZVP     | *        |
| linear diborazane iso2         | 0     | -322.6712157 | 148.28239      | -322.423079             | -322.470053             | B3LYP-GDBJ | def2tzvp |          |
| linear diborazane Int1         | 0     | -322.6712158 | 148.28347      | -322.423077             | -322.470052             | B3LYP-GDBJ | def2tzvp |          |
| cyclic diborazane              | 0     | -242.8431560 | 100.11565      | -242.675116             | -242.715384             | B3LYP-GDBJ | def2tzvp |          |
| cyclic dimethyl diborazane C2v | 0     | -321.4089583 | 131.03279      | -321.189039             | -321.233442             | BP86       | TZVP     | *        |

|                                          |   |               |           |              |              |            |              |   |
|------------------------------------------|---|---------------|-----------|--------------|--------------|------------|--------------|---|
| cyclic dimethyl diborazane C2v           | 0 | -321.4932799  | 135.24129 | -321.267042  | -321.310625  | B3LYP-GDBJ | def2tzvp     | * |
| TS to cyclic diborazane via CA           | 1 | -242.8023918  | 97.49872  | -242.637628  | -242.679338  | B3LYP-GDBJ | def2tzvp     |   |
| TS to cyclic dimethyl diborazane via CA  | 1 | -321.3683997  | 128.62801 | -321.15138   | -321.198947  | BP86       | TZVP         |   |
| TS to cyclic dimethyl diborazane via CA  | 1 | -321.45292    | 132.70243 | -321.229705  | -321.276682  | B3LYP-GDBJ | def2tzvp     |   |
| TS1 dehydrogenation of 2 MAB sp Step3    | 1 | -245.1007104  | 117.91028 | -244.900978  | -244.948233  | B3LYP-GDBJ | def2tzvp     |   |
| TS1 dehydrogenation of 2 MAB 2H2 at once | 1 | -245.1131206  | 115.91495 | -244.917162  | -244.963015  | B3LYP-GDBJ | def2tzvp     |   |
| Int1 dehydrogenation of 2 MAB            | 0 | -244.0213506  | 113.09108 | -243.831506  | -243.873629  | B3LYP-GDBJ | def2tzvp     |   |
| TS2 dehydrogenation of 2 MAB             | 1 | -243.9674273  | 107.06032 | -243.786457  | -243.83073   | B3LYP-GDBJ | def2tzvp     |   |
| TS1 dehydrogenation of 2 DMAB            | 1 | -323.7577075  | 153.09982 | -323.499478  | -323.55146   | B3LYP-GDBJ | def2tzvp     |   |
| TS2 dehydrogenation of 2 DMAB            | 1 | -322.6145704  | 141.97784 | -322.375494  | -322.424324  | B3LYP-GDBJ | def2tzvp     |   |
| ZrClZrCl iso1 Cl inin                    |   | not           | converged |              |              | B3LYP-GDBJ | def2tzvp     |   |
| ZrClZrCl iso2 Cl inout                   | 0 | -2722.576683  | 365.05853 | -2721.951059 | -2722.069612 | B3LYP-GDBJ | def2tzvp     |   |
| ZrClZrCl iso3 Cl outout                  | 0 | -2722.576404  | 365.30846 | -2721.950469 | -2722.068421 | B3LYP-GDBJ | def2tzvp     |   |
| ZrClZrMe iso1 Me inin                    | 0 | -2302.200271  | 386.36967 | -2301.540154 | -2301.6583   | B3LYP-GDBJ | def2tzvp     |   |
| ZrClZrMe iso2 inout                      | 0 | -2302.194764  | 386.18525 | -2301.534775 | -2301.654533 | B3LYP-GDBJ | def2tzvp     |   |
| ZrMeZrCl iso3 inout                      | 0 | -2302.194549  | 386.13773 | -2301.534612 | -2301.654024 | B3LYP-GDBJ | def2tzvp     |   |
| ZrMeZrCl iso4 outout                     | 0 | -2302.194218  | 386.77812 | -2301.533719 | -2301.651438 | B3LYP-GDBJ | def2tzvp     |   |
| ZrHZrH iso1 H inin                       | 0 | -1801.9464423 | 358.46668 | -1801.331793 | -1801.451657 | BP86       | TZVP/LANL2DZ | * |
| ZrHZrH iso1 H inin                       | 0 | -1803.1386609 | 371.43105 | -1802.505463 | -1802.61952  | B3LYP-GDBJ | def2tzvp     |   |
| ZrHZrH iso2 H outin                      | 0 | -1801.9457936 | 358.4967  | -1801.331155 | -1801.451288 | BP86       | TZVP/LANL2DZ |   |
| ZrHZrH iso3 H inout                      | 0 | -1801.9457986 | 358.58546 | -1801.331082 | -1801.450551 | BP86       | TZVP/LANL2DZ |   |
| ZrHZrH iso4 H outout                     | 0 | -1801.9390522 | 359.13216 | -1801.324091 | -1801.440304 | BP86       | TZVP/LANL2DZ |   |
| ZrMeZrMe iso1 Me inin                    | 0 | -1880.5956336 | 393.08804 | -1879.92156  | -1880.048073 | BP86       | TZVP/LANL2DZ | * |
| ZrMeZrMe iso1 Me inin sing. point        | 0 | -1881.8079262 | 405.07715 | -1881.119925 | -1881.230412 | B3LYP-GDBJ | def2tzvp     |   |
| ZrMeZrMe iso1 Me inin opt                | 0 | -1881.8181913 | 407.4314  | -1881.12387  | -1881.242601 | B3LYP-GDBJ | def2tzvp     | * |
| ZrMeZrMe iso2 Me outin                   | 0 | -1880.5923380 | 393.38829 | -1879.917945 | -1880.044316 | BP86       | TZVP/LANL2DZ |   |
| ZrMeZrMe iso2 Me outin sing. Point       | 0 | -1881.8017101 | 405.21062 | -1881.113558 | -1881.223959 | B3LYP-GDBJ | def2tzvp     |   |
| ZrMeZrMe iso2 Me outin opt               | 0 | -1881.8118475 | 406.86068 | -1881.117896 | -1881.23997  | B3LYP-GDBJ | def2tzvp     | * |
| ZrMeZrMe iso3 Me outout                  | 0 | -1880.5918287 | 394.01732 | -1879.917063 | -1880.040566 | BP86       | TZVP/LANL2DZ |   |



|                                               |   |               |            |              |              |            |              |   |
|-----------------------------------------------|---|---------------|------------|--------------|--------------|------------|--------------|---|
| ZrMeZrMe iso3 Me outout                       | 0 | -1881.8118148 | 407.26656  | -1881.117664 | -1881.237504 | B3LYP-GDBJ | def2tzvp     |   |
| ZrNMe2ZrNMe2 iso1                             | 0 | -2070.0143888 | 450.872680 | -2069.244149 | -2069.377813 | BP86       | TZVP/LANL2DZ | * |
| ZrNMe2ZrNMe2 iso1                             | 0 | -2071.2755485 | 466.624380 | -2070.482260 | -2070.610521 | B3LYP-GDBJ | def2tzvp     | * |
| ZrNMe2ZrNMe2 iso2                             | 0 | -2070.0060475 | 451.000790 | -2069.235608 | -2069.369263 | BP86       | TZVP/LANL2DZ |   |
| ZrNMe2ZrNMe2 iso3                             | 0 | -2070.0055196 | 451.305470 | -2069.235037 | -2069.365251 | BP86       | TZVP/LANL2DZ |   |
| ZrNMe2ZrNMe2 iso4                             | 0 | -2070.0105908 | 450.341930 | -2069.240871 | -2069.374804 | BP86       | TZVP/LANL2DZ |   |
| ZrNMe2BH3ZrH iso1 inin                        | 0 | -1962.6375533 | 425.849350 | -1961.910415 | -1962.036385 | BP86       | TZVP/LANL2DZ | * |
| ZrNMe2BH3ZrH iso1 inin                        | 0 | -1963.8909117 | 441.799910 | -1963.140821 | -1963.260887 | B3LYP-GDBJ | def2tzvp     | * |
| ZrNMe2BH3ZrH iso2 inin                        | 0 | -1962.6368989 | 426.520670 | -1961.908938 | -1962.034424 | BP86       | TZVP/LANL2DZ |   |
| ZrNMe2BH3ZrH iso3 inin                        | 0 | -1962.6317081 | 426.199420 | -1961.904138 | -1962.031027 | BP86       | TZVP/LANL2DZ |   |
| ZrNMe2BH3ZrH iso4 B outin                     | 0 | -1962.6372628 | 425.834110 | -1961.910073 | -1962.036756 | BP86       | TZVP/LANL2DZ |   |
| ZrNMe2BH3ZrH iso5 B inout                     | 0 | -1962.6329203 | 426.453920 | -1961.905013 | -1962.030812 | BP86       | TZVP/LANL2DZ |   |
| ZrNMe2BH3ZrH iso6 outout                      | 0 | -1962.6336454 | 426.213270 | -1961.905819 | -1962.033910 | BP86       | TZVP/LANL2DZ |   |
| ZrHZrH_DMAB_Int1                              | 0 | -1965.0763241 | 451.767710 | -1964.307568 | -1964.438697 | B3LYP-GDBJ | def2tzvp     |   |
| ZrNMe2BH3ZrNMe2BH3 iso1 inin                  | 0 | -2123.3294084 | 493.036700 | -2122.489258 | -2122.627112 | BP86       | TZVP/LANL2DZ | * |
| ZrNMe2BH3ZrNMe2BH3 iso1 inin                  | 0 | -2124.6382645 | 511.689720 | -2123.771317 | -2123.901208 | B3LYP-GDBJ | def2tzvp     |   |
| ZrNMe2BH3ZrNMe2BH3 iso1 int1                  | 0 | -2124.6418511 | 510.351160 | -2123.776477 | -2123.908455 | B3LYP-GDBJ | def2tzvp     |   |
| ZrNMe2BH3ZrNMe2BH3 iso1 int2                  | 0 | -2124.6295349 | 510.035030 | -2123.764708 | -2123.897360 | B3LYP-GDBJ | def2tzvp     |   |
| ZrNMe2BH3ZrNMe2BH3_2mz_sp_Int3_tzvp2          | 0 | -2124.6322023 | 506.218530 | -2123.776711 | -2123.899317 | B3LYP-GDBJ | def2tzvp     |   |
| ZrNMe2BH3ZrNMe2BH3_2mz_opt_Int3_tzvp3         | 0 | -2124.6397435 | 508.540650 | -2123.776347 | -2123.913194 | B3LYP-GDBJ | def2tzvp     | * |
| ZrNMe2BH3ZrNMe2BH3_ZrHB_bonded_opt_freq_Int1  | 0 | -2124.6267561 | 507.768990 | -2123.764455 | -2123.900896 | B3LYP-GDBJ | def2tzvp     |   |
| ZrNMe2BH3ZrNMe2BH3_ZrHB_bonded-b3lyp_opt_freq | 1 | -2124.6204000 | 508.812510 | -2123.757703 | -2123.889987 | B3LYP-GDBJ | def2tzvp     |   |
| ZrNMe2BH3ZrNMe2BH3_b3lyp_opt_freq_abcleavInt2 | 0 | -2124.6295349 | 510.035030 | -2123.764708 | -2123.897360 | B3LYP-GDBJ | def2tzvp     |   |
| ZrNMe2BH3ZrNMe2BH3_b3lyp_opt_freq_abcleavTS1  | 1 | -2124.6166876 | 509.472530 | -2123.752974 | -2123.884888 | B3LYP-GDBJ | def2tzvp     |   |
| ZrHZrH_2DMAB_b3lyp_freq_iso1                  | 0 | -2127.0145433 | 532.417620 | -2126.109749 | -2126.258306 | B3LYP-GDBJ | def2tzvp     |   |
| ZrNMe2BH3ZrNMe2BH3 iso2 inin                  | 0 | -2123.3258207 | 494.033280 | -2122.484690 | -2122.620251 | BP86       | TZVP/LANL2DZ |   |
| ZrNMe2BH3ZrNMe2BH3 iso3 outin                 | 0 | -2123.3264888 | 493.225700 | -2122.486250 | -2122.623257 | BP86       | TZVP/LANL2DZ |   |
| ZrNMe2BH3ZrNMe2BH3 iso4 outout                | 0 | -2123.3262390 | 493.973960 | -2122.485374 | -2122.619952 | BP86       | TZVP/LANL2DZ |   |

|                                          |   |               |            |              |              |            |              |   |
|------------------------------------------|---|---------------|------------|--------------|--------------|------------|--------------|---|
| ZrNMe2BH3ZrNMe2BH3 iso5 inin             | 0 | -2123.3243420 | 493.796580 | -2122.483617 | -2122.618958 | BP86       | TZVP/LANL2DZ |   |
| ZrNMe2BH3ZrNMe2BH3 iso6 inin             | 0 | -2123.3185933 | 494.283260 | -2122.477599 | -2122.610812 | BP86       | TZVP/LANL2DZ |   |
| ZrDiDMABZrH iso 1                        | 0 | -2123.3112398 | 491.73454  | -2122.472965 | -2122.615033 | BP86       | TZVP/LANL2DZ |   |
| ZrDiDMABZrH iso2                         | 0 | -2123.3139841 | 492.04464  | -2122.475464 | -2122.614604 | BP86       | TZVP/LANL2DZ | * |
| ZrDiDMABZrH iso2                         | 0 | -2124.6192868 | 509.92556  | -2123.754743 | -2123.888349 | B3LYP-GDBJ | def2tzvp     | * |
| ZrCCSiMe3ZrCH2SiMe3 sing                 | 0 | -1801.9810779 | 362.127210 | -1801.360945 | -1801.476921 | BP86       | TZVP/LANL2DZ | * |
| ZrCCSiMe3ZrCH2SiMe3 sing                 | 0 | -1803.1695811 | 375.095900 | -1802.530892 | -1802.641671 | B3LYP-GDBJ | def2tzvp     |   |
| ZrCCSiMe3ZrCH2SiMe3 trip                 | 0 | -1801.9373784 | 360.97108  | -1801.318057 | -1801.441395 | BP86       | TZVP/LANL2DZ |   |
| ZrCCSiMe3ZrCH2SiMe3 sing iso2            | 0 | -1803.1729651 | 374.32702  | -1802.535010 | -1802.64791  | B3LYP-GDBJ | def2tzvp     |   |
| ZrCCSiMe3ZrCH2SiMe3 iso2 TS CH3_1wrongTS | 1 | -1803.1689955 | 374.40746  | -1802.531812 | -1802.641643 | B3LYP-GDBJ | def2tzvp     |   |
| ZrCCSiMe3ZrCH2SiMe3 iso2 TS CH2TMS rot.  | 1 | -1803.1605963 | 374.49170  | -1802.523170 | -1802.633302 | B3LYP-GDBJ | def2tzvp     |   |
| ZrCCSiMe3ZrCH2SiMe3 iso2 TS alkynyl      | 1 | -1803.1250976 | 373.07566  | -1802.489228 | -1802.602995 | B3LYP-GDBJ | def2tzvp     |   |
| ZrCCSiMe3ZrCH2SiMe3_H2_TS2               | 1 | -1804.316733  | 383.101560 | -1803.663672 | -1803.778891 | B3LYP-GDBJ | def2tzvp     |   |
| ZrCCSiMe3ZrCH2SiMe3_H2_Int2              | 0 | -1804.324105  | 385.14723  | -1803.66814  | -1803.783559 | B3LYP-GDBJ | def2tzvp     |   |
| ZrCCSiMe3ZrDMAB iso 1                    | 0 | -1514.5794360 | 348.26695  | -1513.985283 | -1514.09279  | BP86       | TZVP/LANL2DZ |   |
| ZrCCSiMe3ZrDMAB iso 2                    | 0 | -1514.6188310 | 349.02625  | -1514.023532 | -1514.130243 | BP86       | TZVP/LANL2DZ | * |
| ZrCCSiMe3ZrDMAB iso 2                    | 0 | -1515.7996463 | 361.72586  | -1515.185845 | -1515.289202 | B3LYP-GDBJ | def2tzvp     | * |
| ZrCCSiMe3ZrH iso1 sing                   | 0 | -1353.9396980 | 282.693690 | -1353.456036 | -1353.552025 | BP86       | TZVP/LANL2DZ | * |
| ZrCCSiMe3ZrH iso1 sing                   | 0 | -1355.0583114 | 292.663250 | -1354.560246 | -1354.652465 | B3LYP-GDBJ | def2tzvp     | * |
| ZrCCSiMe3ZrH iso2 sing                   | 0 | -1353.9394425 | 282.561520 | -1353.455922 | -1353.552181 | BP86       | TZVP/LANL2DZ |   |
| ZrCCSiMe3ZrH trip                        | 0 | -1353.9081220 | 281.590810 | -1353.425597 | -1353.524795 | BP86       | TZVP/LANL2DZ |   |
| ZrCCCHZr TS1                             | 1 | -1803.1092222 | 371.202960 | -1802.477398 | -1802.587197 | B3LYP-GDBJ | def2tzvp     |   |
| ZrCCCHZr Int1                            | 0 | -1803.1290998 | 373.565800 | -1802.493422 | -1802.602950 | B3LYP-GDBJ | def2tzvp     |   |
| ZrCCCHZr TS2                             | 1 | -1803.0835794 | 373.919130 | -1802.448163 | -1802.555603 | B3LYP-GDBJ | def2tzvp     |   |
| ZrCCCHZr TS2_2                           | 1 | -1803.0641057 | 371.944400 | -1802.430770 | -1802.541842 | B3LYP-GDBJ | def2tzvp     |   |
| ZrCCCHZr Int2                            | 0 | -1803.1339716 | 373.934190 | -1802.497961 | -1802.606710 | B3LYP-GDBJ | def2tzvp     |   |
| ZrCCCHZr Int2_2                          | 0 | -1803.1141298 | 374.442650 | -1802.477024 | -1802.585440 | B3LYP-GDBJ | def2tzvp     |   |
| ZrCCCHZr TS3                             | 1 | -1803.0574056 | 373.424450 | -1802.422438 | -1802.530991 | B3LYP-GDBJ | def2tzvp     |   |
| ZrCCCHZr TS3_2                           | 1 | -1803.0044991 | 370.728230 | -1802.372795 | -1802.484007 | B3LYP-GDBJ | def2tzvp     |   |

|                                                 |   |               |            |              |              |             |             |   |
|-------------------------------------------------|---|---------------|------------|--------------|--------------|-------------|-------------|---|
| ZrCCCHZr Int3                                   | 0 | -1803.1073663 | 373.959160 | -1802.469770 | -1802.585760 | B3LYP-GDBJ  | def2tzvp    |   |
| ZrNMe2BH3ZrNMe2BH3 iso2 inin                    | 0 | -2122.8245002 | 511.572440 | -2121.957939 | -2122.088209 | B3LYP-GDBJ  | def2svp     |   |
| ZrNMe2BH3ZrNMe2BH3 iso2 TS1                     | 1 | -2122.7662449 | 507.116070 | -2121.906400 | -2122.035415 | B3LYP-GDBJ  | def2svp     |   |
| ZrCCSiMe3ZrH_2_DMABiso 1                        | 0 | -1677.386441  | 453.233320 | -1676.617418 | -1676.744214 | B3LYP-GDBJ  | def2svp     | * |
| ZrCCSiMe3ZrH_2_DMABiso 2                        | 0 | -1677.375716  | 452.946230 | -1676.606782 | -1676.735301 | B3LYP-GDBJ  | def2svp     |   |
| ZrCCSiMe3ZrH_2_DMABiso 3                        | 0 | -1677.382508  | 452.915980 | -1676.613839 | -1676.743501 | B3LYP-GDBJ  | def2svp     |   |
| ZrCCSiMe3ZrH_DMAB_Int1                          | 0 | -1516.995146  | 373.18729  | -1516.361164 | -1516.470179 | B3LYP-GDBJ  | def2tzvp    | * |
| ZrCCSiMe3ZrH_DMAB_Int2                          | 0 | -1516.973399  | 369.49668  | -1516.345318 | -1516.455498 | B3LYP-GDBJ  | def2tzvp    | * |
| ZrCCSiMe3ZrH3_DMAoB_TS1 sp                      | 0 | -1516.968940  | 368.512200 | -1516.345099 | -1516.445368 | B3LYP-GDBJ  | def2tzvp    |   |
| ZrCCSiMe3ZrH3_DMAoB_TS1 opt                     | 1 | -1516.972909  | 369.375910 | -1516.345930 | -1516.452928 | B3LYP-GDBJ  | def2tzvp    |   |
| ZrCCSiMe3ZrH3_DMAoB_TS2 sp                      | 0 | -1516.966901  | 367.968320 | -1516.343213 | -1516.447374 | B3LYP-GDBJ  | def2tzvp    |   |
| ZrCCSiMe3ZrH3_DMAoB_TS2 opt                     | 1 | -1516.971008  | 368.654450 | -1516.344212 | -1516.457016 | B3LYP-GDBJ  | def2tzvp    |   |
| ZrCCSiMe3ZrH3_Int3                              | 0 | -1356.229746  | 302.35346  | -1355.715222 | -1355.811082 | B3LYP-GDBJ  | def2tzvp    | * |
| ZrCCSiMe3ZrH3_TS3                               | 1 | -1356.212137  | 300.615250 | -1355.699847 | -1355.796412 | B3LYP-GDBJ  | def2tzvp    |   |
| ZrCCSiMe3ZrCH2SiMe3_H2_TS2                      | 1 | -1804.316733  | 383.101560 | -1803.663672 | -1803.778891 | B3LYP-GDBJ  | def2tzvp    |   |
| ZrCCSiMe3ZrCH2SiMe3_H2_Int2                     | 0 | -1804.324105  | 385.14723  | -1803.66814  | -1803.783559 | B3LYP-GDBJ  | def2tzvp    |   |
| Cp2ZrCCSiMe3ZrMe iso1 2Zr3                      | 0 | -1394.3867388 | 310.597640 | -1393.858120 | -1393.954423 | B3LYP/GD3BJ | def2tzvp    | * |
| Cp2ZrCCSiMe3ZrMe iso2 Zr4Zr2                    | 0 | -1394.3864998 | 310.509640 | -1393.858009 | -1393.954205 | B3LYP/GD3BJ | def2tzvp    |   |
| Cp2ZrCCSiMe3ZrMe TS-iso1-iso2 CH3 rot           | 1 | -1394.3838625 | 310.071170 | -1393.856325 | -1393.952139 | B3LYP/GD3BJ | def2tzvp    |   |
| Cp2ZrCCSiMe3ZrMe TS-iso1-iso2 CH3 umbr.         | 1 | -1394.359707  | 309.859630 | -1393.832516 | -1393.928814 | B3LYP/GD3BJ | def2tzvp    |   |
| Cp2ZrCCSiMe3ZrMe TS-iso1-iso2 alkynyl           | 1 | -1394.3401941 | 309.263810 | -1393.813703 | -1393.911480 | B3LYP/GD3BJ | def2tzvp    |   |
| ZrCCSiMe3ZrCH3_H2_TS3_2                         | 0 | -1395.568022  | 317.79776  | -1395.024413 | -1395.129327 | B3LYP/GD3BJ | def2tzvp    |   |
| ZrCCSiMe3ZrCH3_H2_Int1                          | 0 | -1395.567825  | 317.70989  | -1395.024431 | -1395.128456 | B3LYP/GD3BJ | def2tzvp    |   |
| ZrCCSiMe3ZrCH3_H2_Int6_b3lyp_sp_freq_tzvp_step7 | 1 | -1395.568889  | 321.28122  | -1395.021933 | -1395.122748 | B3LYP/GD3BJ | def2tzvp    |   |
| ZrCCSiMe3ZrCH3_H2_scanTS5_sp_tzvp_step10        | 0 | -1395.559231  | 321.71253  | -1395.013969 | -1395.105881 | B3LYP/GD3BJ | def2tzvp    |   |
| ZrCCSiMe3ZrCH3_H2_scanTS5_sp_tzvp_step11        | 0 | -1395.559231  | 321.71253  | -1395.013969 | -1395.105881 | B3LYP/GD3BJ | def2tzvp    |   |
| ZrCCSiMe3ZrCH3_H2_Int5_b3lyp_opt_freq_tzvp      | 0 | -1395.60142   | 321.31869  | -1395.052895 | -1395.158128 | B3LYP/GD3BJ | def2tzvp    |   |
| hydogen                                         | 0 | -1.1795214    | 5.90726    | -1.166803    | -1.181649    | B3LYP/GD3BJ | def2tzvp/sp |   |
| dimethylaminborane                              | 0 | -161.9151723  | 79.04775   | -161.783022  | -161.816279  | B3LYP/GD3BJ | def2tzvp/sp |   |

|                   |    |              |           |              |              |             |             |  |
|-------------------|----|--------------|-----------|--------------|--------------|-------------|-------------|--|
| Me2NBH2 C2V       | 0  | -160.7326273 | 65.2668   | -160.622842  | -160.655295  | B3LYP/GD3BJ | def2tzvp/sp |  |
| ZrHZrH_cat        | 0  | -1803.133015 | 370.34881 | -1802.504882 | -1802.607224 | B3LYP/GD3BJ | def2tzvp/sp |  |
| ZrHZrH_DMAB_Int1  | 0  | -1965.06945  | 450.36683 | -1964.307122 | -1964.424006 | B3LYP/GD3BJ | def2tzvp/sp |  |
| ZrHZrH_DMAB_TS1   | -1 | -1965.008714 | 448.062   | -1964.250895 | -1964.364089 | B3LYP/GD3BJ | def2tzvp/sp |  |
| ZrHZrH_DMAB_Int2  | 0  | -1965.062178 | 448.21015 | -1964.302922 | -1964.417788 | B3LYP/GD3BJ | def2tzvp/sp |  |
| ZrHZrH_DMAB_Int3  | 0  | -1963.881297 | 438.32578 | -1963.139526 | -1963.251963 | B3LYP/GD3BJ | def2tzvp/sp |  |
| ZrHZrH_DMAB_TS2   | 0  | -1963.862091 | 436.80642 | -1963.12278  | -1963.235929 | B3LYP/GD3BJ | def2tzvp/sp |  |
| ZrHZrH_DMAB_Int4  | 0  | -1963.874597 | 436.99242 | -1963.134039 | -1963.249943 | B3LYP/GD3BJ | def2tzvp/sp |  |
| ZrHZrH_DMAB_Intx  | 0  | -1965.0637   | 448.58241 | -1964.30406  | -1964.418117 | B3LYP/GD3BJ | def2tzvp/sp |  |
| ZrHZrH_DMAB_cat   | 0  | -1963.881297 | 438.32571 | -1963.139526 | -1963.251963 | B3LYP/GD3BJ | def2tzvp/sp |  |
| ZrHZrH_2DMAB_Int1 | 0  | -2125.819701 | 518.52124 | -2124.943571 | -2125.069642 | B3LYP/GD3BJ | def2tzvp/sp |  |
| ZrHZrH_2DMAB_TS1  | -1 | -2125.77456  | 517.19334 | -2124.901714 | -2125.022267 | B3LYP/GD3BJ | def2tzvp/sp |  |
| ZrHZrH_2DMAB_Int2 | 0  | -2125.81529  | 516.64547 | -2124.941471 | -2125.067165 | B3LYP/GD3BJ | def2tzvp/sp |  |
| ZrHZrH_2DMAB_Int3 | 0  | -2124.632202 | 506.21853 | -2123.776711 | -2123.899317 | B3LYP/GD3BJ | def2tzvp/sp |  |
| ZrHZrH_2DMAB_TS2  | -1 | -2124.620293 | 504.35207 | -2123.767904 | -2123.890933 | B3LYP/GD3BJ | def2tzvp/sp |  |
| ZrHZrH_2DMAB_Int4 | 0  | -2124.622389 | 504.65338 | -2123.768897 | -2123.893011 | B3LYP/GD3BJ | def2tzvp/sp |  |
| ZrHZrH_DMAB_Int1  | 0  | -1963.290254 | 451.20558 | -1962.522505 | -1962.653584 | B3LYP/GD3BJ | def2svpp    |  |
| ZrHZrH_DMAB_TS1   | -1 | -1963.229069 | 449.1853  | -1962.465739 | -1962.590852 | B3LYP/GD3BJ | def2svpp    |  |
| ZrHZrH_2DMAB_Int1 | 0  | -2123.848334 | 520.00643 | -2122.965501 | -2123.105063 | B3LYP/GD3BJ | def2svpp    |  |
| ZrHZrH_2DMAB_TS1  | -1 | -2123.803953 | 518.34128 | -2122.924909 | -2123.058285 | B3LYP/GD3BJ | def2svpp    |  |

## 7. References

- [1] H. J. Drexler, A. Preetz, T. Schmid, D. Heller, "Kinetics of Homogeneous Hydrogenations: Measurement and Interpretation", chapter 10 in "Handbook of Homogeneous Hydrogenation", WILEY-VCH, J.G. de Vries, C.J. Elsevier, 257-295, 2007.
- [2] Gaussian 09, Revision E.01, M. J. Frisch, G. W. Trucks, H. B. Schlegel, G. E. Scuseria, M. A. Robb, J. R. Cheeseman, G. Scalmani, V. Barone, B. Mennucci, G. A. Petersson, H. Nakatsuji, M. Caricato, X. Li, H. P. Hratchian, A. F. Izmaylov, J. Bloino, G. Zheng, J. L. Sonnenberg, M. Hada, M. Ehara, K. Toyota, R. Fukuda, J. Hasegawa, M. Ishida, T. Nakajima, Y. Honda, O. Kitao, H. Nakai, T. Vreven, J. A. Montgomery, Jr., J. E. Peralta, F. Ogliaro, M. Bearpark, J. J. Heyd, E. Brothers, K. N. Kudin, V. N. Staroverov, T. Keith, R. Kobayashi, J. Normand, K. Raghavachari, A. Rendell, J. C. Burant, S. S. Iyengar, J. Tomasi, M. Cossi, N. Rega, J. M. Millam, M. Klene, J. E. Knox, J. B. Cross, V. Bakken, C. Adamo, J. Jaramillo, R. Gomperts, R. E. Stratmann, O. Yazyev, A. J. Austin, R. Cammi, C. Pomelli, J. W. Ochterski, R. L. Martin, K. Morokuma, V. G. Zakrzewski, G. A. Voth, P. Salvador, J. J. Dannenberg, S. Dapprich, A. D. Daniels, O. Farkas, J. B. Foresman, J. V. Ortiz, J. Cioslowski, and D. J. Fox, Gaussian, Inc., Wallingford CT, **2013**.
- [3] A. D. Becke, *Phys. Rev. A*, 1988, **38**, 3098–3100; b) J. P. Perdew, *Phys. Rev. B*, 1986, **33**, 8822–8824.
- [4] a) P. J. Hay and W. R. Wadt, *J. Chem. Phys.*, 1985, **82**, 270–283; b) P. J. Hay and W. R. Wadt, *J. Chem. Phys.*, 1985, **82**, 299–310.
- [5] A. Schäfer, C. Huber and R. Ahlrichs, *J. Chem. Phys.*, 1994, **100**, 5829–5835.
- [6] J. Zhu, E.-L. Zins and M. E. Alikhani, *Phys. Chem. Chem. Phys.*, 2018, **20**, 15687-15695.
- [7] a) S. H. Vosko, L. Wilk and M. Nusair, *Can. J. Phys.*, 1980, **58**, 1200–1211; b) C. Lee, W. Yang and R. G. Parr, *Phys. Rev. B*, 1988, **37**, 785–789; c) B. Miehlich, A. Savin, H. Stoll and H. Preuss, *Chem. Phys. Lett.*, 1989, **157**, 200–206; d) A. D. Becke, *J. Chem. Phys.*, 1993, **98**, 5648–5652.
- [8] F. Weigend and R. Ahlrichs, *Phys. Chem. Chem. Phys.*, 2005, **7**, 3297–3305.
- [9] S. Grimme, S. Ehrlich and L. Goerigk, *J. Comp. Chem.*, 2011, **32**, 1456-1465.
- [10] <https://www.ccdc.cam.ac.uk/support-and-resources/Downloads/>
